# Supplementary material
Source: PubMed Central journal article supplement (PMC5496005)

## Supporting Information

### **Conformationally superarmed S-ethyl glycosyl donors as effective building blocks for chemoselective oligosaccharide synthesis in one pot**

Mithila D. Bandara,<sup>1</sup> Jagodige P. Yasomanee,<sup>1</sup> Nigam P. Rath,<sup>1</sup> Christian M. Pedersen,<sup>2</sup> Mikael Bols,<sup>2</sup> and Alexei V. Demchenko<sup>\*,1</sup>

<sup>1</sup> Department of Chemistry and Biochemistry, University of Missouri – St. Louis  
One University Boulevard, St. Louis, MO 63121, USA;

<sup>2</sup> Department of Chemistry, University of Copenhagen, 2100 Copenhagen Ø, Denmark

## Content

|                                                         |     |
|---------------------------------------------------------|-----|
| General Experimental                                    | S1  |
| Preparation of Glycosyl Donors                          | S2  |
| Synthesis of Glycosyl Acceptors                         | S6  |
| General Procedures for Competition Experiments          | S7  |
| Synthesis of Disaccharides                              | S7  |
| One-Pot One-Addition Trisaccharide Synthesis            | S9  |
| X-ray Structure Determination of Disaccharide <b>10</b> | S11 |
| References                                              | S12 |
| NMR Spectra                                             | S13 |
| X-Ray Data for Disaccharide <b>10</b>                   | S45 |

## General Experimental

The reactions were performed using commercial reagents and the ACS grade solvents were purified and dried according to standard procedures. Column chromatography was performed on silica gel 60 (70-230 mesh), reactions were monitored by TLC on Kieselgel 60 F<sub>254</sub>. The compounds were detected by examination under UV light and by charring with 10% sulfuric acid in methanol. Solvents were removed under reduced pressure at <40 °C. CH<sub>2</sub>Cl<sub>2</sub> was distilled from CaH<sub>2</sub> directly prior to application. Acetonitrile was dried by refluxing with CaH<sub>2</sub> and then distilled and stored over molecular sieves (3 Å). Molecular sieves (3 or 4Å), used for reactions, were crushed and activated *in vacuo* at 390 °C during 8 h in the first instance and then for 2-3 h at 390 °C directly prior to application. Optical rotations were measured using a polarimeter. <sup>1</sup>H NMR spectra were recorded at 300 or 600 MHz, <sup>13</sup>C NMR spectra were recorded at 75 MHz or 150 MHz. The <sup>1</sup>H chemical shifts are referenced to the signal of the residual CHCl<sub>3</sub> (δ<sub>H</sub> = 7.24 ppm). The <sup>13</sup>C chemical shifts are referenced to the central signal of CDCl<sub>3</sub> (δ<sub>C</sub> = 77.23 ppm). HRMS determinations were made with the use of a mass spectrometer with FAB ionization and ion-trap detection.

## Preparation of Glycosyl Donors

**Ethyl 2-*O*-benzoyl-6-*O*-benzyl-1-thio- $\beta$ -D-glucopyranoside (S2).** A mixture of ethyl 2-*O*-benzoyl-4,6-*O*-benzylidene-1-thio- $\beta$ -D-glucopyranoside (**S1**,<sup>1</sup> 2.56 g, 6.15 mmol) and molecular sieves (3 Å, 3.0 g) in dry THF (80 mL) was stirred under argon for 1 h at rt. NaCNBH<sub>3</sub> (5.15 g, 81.8 mmol) and a 2 M solution of HCl in diethyl ether (40.9 mL, 81.8 mmol) were added and the resulting mixture was stirred for 30 min at rt. After that, the volatiles were removed under reduced pressure and the residue was diluted with CH<sub>2</sub>Cl<sub>2</sub> (~150 mL). The solid was filtered off through a pad of Celite and rinsed successively with CH<sub>2</sub>Cl<sub>2</sub>. The combined filtrate (~250 mL) was washed with water (50 mL), sat. aq. NaHCO<sub>3</sub> (50 mL), and water (3 x 50 mL). The organic phase was separated, dried over MgSO<sub>4</sub>, and concentrated *in vacuo*. The residue was purified by column chromatography on silica gel (ethyl acetate – hexane gradient elution) to afford the title compound in 82% yield (2.11 g, 5.04 mmol) as a white amorphous solid. Analytical data for **S2**:  $R_f$  = 0.25 (ethyl acetate/hexane, 3/7, v/v);  $[\alpha]_D^{27}$  -54.4 (c = 1, CHCl<sub>3</sub>); <sup>1</sup>H NMR (300 MHz, CDCl<sub>3</sub>):  $\delta$ , 1.21 (t, 3H,  $J$  = 7.4 Hz, CH<sub>2</sub>CH<sub>3</sub>), 2.68 (m, 2H, CH<sub>2</sub>CH<sub>3</sub>), 3.48 (m, 1H, H-5), 3.65-3.78 (m, 3H, H-3, 4, 6b), 3.90 (s, 1H, OH), 3.82 (s, 1H, OH), 4.51 (d, 1H,  $J_{1,2}$  = 9.5 Hz, H-1), 4.55 (br. s, 2H, CH<sub>2</sub>Ph), 5.06 (dd, 1H,  $J_{2,3}$  = 9.5 Hz, H-2), 7.29-8.04 (10H, aromatic) ppm; <sup>13</sup>C NMR (75 MHz, CDCl<sub>3</sub>):  $\delta$ , 15.2, 24.1, 70.1, 71.8, 73.0, 73.7, 76.7, 78.7, 83.3, 127.9 (x3), 128.5 (x4), 129.7, 130.1 (x2), 133.4, 137.7, 166.4 ppm; HR-FAB MS  $[M+Na]^+$  calcd for C<sub>22</sub>H<sub>26</sub>NaO<sub>6</sub>S<sup>+</sup> 441.1348, found 441.1334.

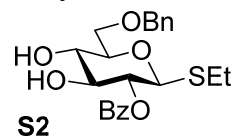

**Ethyl 2,6-di-*O*-benzyl-1-thio- $\beta$ -D-glucopyranoside (S4).** A mixture of ethyl 2-*O*-benzyl-4,6-*O*-benzylidene-1-thio- $\beta$ -D-glucopyranoside (**S3**,<sup>2</sup> 1.58 g, 3.92 mmol) and molecular sieves (3 Å, 2.0 g) in dry THF (65 mL) was stirred under argon for 1 h at rt. NaCNBH<sub>3</sub> (3.29 g, 52.0 mmol) and a 2 M solution of HCl in diethyl ether (26.1 mL, 52.0 mmol) were added and the resulting mixture was stirred for 30 min at rt. After that, the volatiles were removed under reduced pressure and the residue was diluted with CH<sub>2</sub>Cl<sub>2</sub> (~50 mL). The solid was filtered off through a pad of Celite and rinsed successively with CH<sub>2</sub>Cl<sub>2</sub>. The combined filtrate (~100 mL) was washed with water (20 mL), sat. aq. NaHCO<sub>3</sub> (20 mL), and water (3 x 20 mL). The organic phase was separated, dried over MgSO<sub>4</sub>, and concentrated *in vacuo*. The residue was purified by column chromatography on silica gel (ethyl acetate – hexane gradient elution) to afford the title compound in 98% yield (1.65 g, 4.07 mmol) as a white amorphous solid. Analytical data for **S4**:  $R_f$  = 0.25 (ethyl acetate/hexane, 3/7, v/v);  $[\alpha]_D^{26.6}$  -28.7 (c = 1, CHCl<sub>3</sub>); <sup>1</sup>H NMR (300 MHz, CDCl<sub>3</sub>):  $\delta$ , 1.32 (t, 3 H,  $J$  = 7.4 Hz, CH<sub>2</sub>CH<sub>3</sub>), 2.76 (m, 2H, CH<sub>2</sub>CH<sub>3</sub>), 3.05 (s, 1H, OH), 3.26 (dd, 1H,  $J_{2,3}$  = 8.6 Hz, H-2), 3.41-3.62 (m, 3H, H-3, 4, 5), 3.67-3.79 (m, 2H, H-6a, 6b), 4.46 (d, 1H,  $J_{1,2}$  = 9.6 Hz, H-1), 4.57 (dd, 2H,  $^2J$  = 13.7 Hz, CH<sub>2</sub>Ph), 4.81 (dd, 2H,  $^2J$  = 10.9 Hz, CH<sub>2</sub>Ph), 7.19-7.50 (m, 10H, aromatic) ppm; <sup>13</sup>C NMR (75 MHz, CDCl<sub>3</sub>):  $\delta$ , 15.3, 25.3, 70.6, 72.0, 73.8, 75.3, 77.8, 78.2, 80.9, 85.0, 127.9 (x2), 128.0, 128.3, 128.5 (x2), 128.7 (x2), 128.8 (x2), 137.9, 138.1 ppm; HR-FAB MS  $[M+Na]^+$  calcd for C<sub>22</sub>H<sub>28</sub>NaO<sub>5</sub>S<sup>+</sup> 427.1554, found 427.1555.

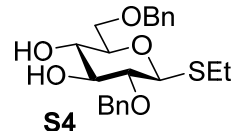

**Ethyl 2-*O*-benzoyl-1-thio- $\beta$ -D-glucopyranoside (S5).** Compound **S1** (0.71 g, 1.70 mmol) was dissolved in a mixture of trifluoroacetic acid in wet CH<sub>2</sub>Cl<sub>2</sub> (20 mL, 2/0.2/17.8, v/v/v) and the resulting mixture was stirred for 30 min at rt. After that, the reaction mixture was neutralized with trimethylamine (~3 mL) and

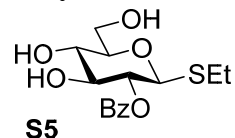

the volatiles were removed under reduced pressure. The residue was purified by column chromatography on silica gel (methanol - dichloromethane gradient elution) to afford the title compound in 86% yield (0.48 g, 1.46 mmol) as a white amorphous solid. Analytical data for **S5**:  $R_f = 0.27$  (methanol/dichloromethane, 1/9, v/v);  $[\alpha]_D^{19.9} -8.1$  ( $c = 1$ , MeOH);  $^1\text{H NMR}$  (300 MHz,  $\text{CD}_3\text{OD}$ ):  $\delta$ , 1.18 (t, 3H,  $J = 7.5$  Hz,  $\text{CH}_2\text{CH}_3$ ), 2.70 (m, 2H,  $\text{CH}_2\text{CH}_3$ ), 3.38-3.47 (m, 2H, H-5, 4), 3.64-3.73 (m, 2H, H-3, 6a), 3.89 (dd, 1H,  $J_{6a,6b} = 12.1$  Hz,  $J_{5,6b} = 1.8$  Hz, H-6b), 4.65 (d, 1H,  $J_{1,2} = 10.0$  Hz, H-1), 4.97 (dd, 1H,  $J_{2,3} = 9.3$  Hz, H-2), 7.45-8.00 (m, 5H, aromatic) ppm;  $^{13}\text{C NMR}$  (75 MHz,  $\text{CD}_3\text{OD}$ ):  $\delta$ , 15.2, 24.9, 62.8, 71.6, 74.5, 77.4, 82.2, 84.6, 129.5 ( $\times 2$ ), 130.7 ( $\times 2$ ), 131.5, 134.3, 167.2 ppm; HR-FAB MS  $[\text{M}+\text{Na}]^+$  calcd for  $\text{C}_{15}\text{H}_{20}\text{NaO}_6\text{S}^+$  351.0879, found 351.0875.

**Ethyl 2-O-benzyl-1-thio- $\beta$ -D-glucopyranoside (S6).** Compound **S3** (0.55 g, 1.36 mmol) was dissolved in a mixture of trifluoroacetic acid in wet  $\text{CH}_2\text{Cl}_2$  (20 mL, 1.5/0.2/14.8, v/v/v) and the resulting mixture was stirred for 30 min at rt. After that, the reaction mixture was neutralized with trimethylamine ( $\sim 2.5$  mL) and the volatiles were removed under reduced pressure. The residue was purified by column chromatography on silica gel (methanol - dichloromethane gradient elution) to afford the title compound in 85% yield (0.36 g, 1.16 mmol) as a white amorphous solid. Analytical data for **S6**:  $R_f = 0.35$  (methanol/dichloromethane, 1/9, v/v);  $[\alpha]_D^{21.5} -45.4$  ( $c = 1$ , MeOH);  $^1\text{H NMR}$  (300 MHz,  $\text{CD}_3\text{OD}$ ):  $\delta$ , 1.17 (t, 3H,  $J = 7.4$  Hz,  $\text{CH}_2\text{CH}_3$ ), 2.65 (m, 2H,  $\text{CH}_2\text{CH}_3$ ), 3.07 (dd, 1H,  $J_{2,3} = 8.8$  Hz, H-2), 3.11-3.26 (m, 2H, H-4, 5), 3.39 (dd, 1H,  $J_{3,4} = 8.8$  Hz, H-3), 3.54 (dd, 1H,  $J_{5,6a} = 5.5$  Hz,  $J_{6a,6b} = 12.0$  Hz, H-6a), 3.74 (dd, 1H,  $J_{5,6b} = 2.1$  Hz, H-6b), 4.36 (d, 1H,  $J_{1,2} = 9.7$  Hz, H-1), 4.70 (s, 2H,  $\text{CH}_2\text{Ph}$ ), 7.10-7.32 (m, 5H, aromatic) ppm;  $^{13}\text{C NMR}$  (75 MHz,  $\text{CD}_3\text{OD}$ ):  $\delta$ , 15.5, 25.5, 63.0, 71.8, 76.2, 79.8, 82.0, 82.9, 85.9, 128.8, 129.3 ( $\times 2$ ), 129.5 ( $\times 2$ ), 139.9 ppm; HR-FAB MS  $[\text{M}+\text{Na}]^+$  calcd for  $\text{C}_{15}\text{H}_{22}\text{NaO}_5\text{S}^+$  337.1086, found 337.1082.

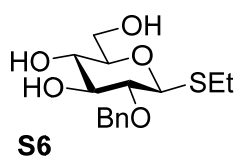

**Ethyl 2,6-di-O-benzoyl-1-thio- $\beta$ -D-glucopyranoside (S7).** A solution of BzCN (0.08 g, 0.81 mmol) in dry  $\text{CH}_3\text{CN}$  (10.0 mL) was added dropwise to a solution of **S5** (0.19 g, 0.58 mmol) and triethyl amine (6.0 mL) in dry  $\text{CH}_3\text{CN}$  (10.0 mL), and the resulting mixture was stirred under argon for 3 h at  $-30$  °C. MeOH ( $\sim 1$  mL) was added and the volatiles were removed under reduced pressure. The residue was purified by column chromatography on silica gel (ethyl acetate - hexane gradient elution) to afford the title compound in 70% yield (0.175 g, 0.41 mmol) as a white amorphous solid. Analytical data for **S7**:  $R_f = 0.37$  (ethyl acetate/hexane, 1/1, v/v);  $[\alpha]_D^{26.6} -7.7$  ( $c = 1$ , MeOH);  $^1\text{H NMR}$  (300 MHz,  $\text{CDCl}_3$ ):  $\delta$ , 1.24 (t, 3H,  $J = 7.4$  Hz,  $\text{CH}_2\text{CH}_3$ ), 2.71 (m, 2H,  $\text{CH}_2\text{CH}_3$ ), 3.16 (d, 1H,  $J = 3.9$  Hz, OH), 3.52 (d, 1H,  $J = 3.1$  Hz, OH), 3.57-3.72 (m, 2H,  $J_{5,6b} = 4.2$  Hz, H-4, 5), 3.84 (ddd, 1H,  $J_{3,4} = 9.3$  Hz, H-3), 4.57 (dd, 1H,  $J_{6a,6b} = 12.2$  Hz, 6a), 4.63 (d, 1H,  $J_{1,2} = 9.8$  Hz, H-1), 4.74 (dd, 1H, H-6b), 5.11 (dd, 1H,  $J_{2,3} = 9.3$  Hz, H-2), 7.51-8.04 (m, 10H, aromatic) ppm;  $^{13}\text{C NMR}$  (75 MHz,  $\text{CDCl}_3$ ):  $\delta$ , 15.2, 24.3, 63.9, 70.7, 73.0, 76.7, 78.2, 83.6, 128.7 ( $\times 4$ ), 129.6, 129.7, 130.1 ( $\times 2$ ), 130.2 ( $\times 2$ ), 133.6, 133.7, 166.5, 167.5 ppm; HR-FAB MS  $[\text{M}+\text{Na}]^+$  calcd for  $\text{C}_{22}\text{H}_{24}\text{NaO}_7\text{S}^+$  455.1141, found 455.1145.

**Ethyl 6-O-benzoyl-2-O-benzyl-1-thio- $\beta$ -D-glucopyranoside (S8).** A solution of BzCN (0.138 g, 1.02 mmol) in dry  $\text{CH}_3\text{CN}$  (15.0 mL) was added dropwise to a solution of **S6** (0.305 g, 0.970 mmol) and triethylamine (10.0 mL) in dry  $\text{CH}_3\text{CN}$  (15.0 mL) at  $-30$  °C and the resulting mixture

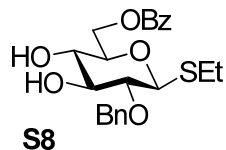

was stirred under argon for 3 h at that temperature. After that, MeOH (1.0 mL) was added to the reaction mixture and the volatiles were removed under reduced pressure. The residue was purified by column chromatography on silica gel (ethyl acetate – hexane gradient elution) to afford the title compound in 75% yield (0.30 g, 0.727 mmol) as a white amorphous solid. Analytical data for **S8**:  $R_f = 0.34$  (ethyl acetate/hexane, 1/1, v/v);  $[\alpha]_D^{21.5} -31.3$  ( $c = 1$ ,  $\text{CHCl}_3$ );  $^1\text{H NMR}$  (300 MHz,  $\text{CDCl}_3$ ):  $\delta$ , 1.30 (t, 3H,  $J = 7.4$  Hz,  $\text{CH}_2\text{CH}_3$ ), 2.75 (m, 2H,  $\text{CH}_2\text{CH}_3$ ), 3.11 (br. s, 1H, OH), 3.26 (dd, 1H,  $J_{2,3} = 9.7$  Hz, H-2), 3.39-3.56 (m, 3H, H-4, 5, OH), 3.58-3.64 (m, 1H, H-3), 4.48 (d, 1H,  $J_{1,2} = 9.7$  Hz, H-1), 4.51-4.60 (m, 2H, H-6a, 6b), 4.80 (dd,  $^2J = 10.9$  Hz,  $\text{CH}_2\text{Ph}$ ), 8.73-7.89 (m, 10H, aromatic) ppm;  $^{13}\text{C NMR}$  (75 MHz,  $\text{CDCl}_3$ ):  $\delta$ , 15.3, 25.3, 64.3, 70.2, 75.3, 77.8, 78.0, 80.9, 85.1, 128.3, 128.5 ( $\times 2$ ), 128.6 ( $\times 2$ ), 128.8 ( $\times 2$ ), 129.8, 130.0 ( $\times 2$ ), 138.0, 133.4, 167.2 ppm; HR-FAB MS  $[\text{M}+\text{Na}]^+$  calcd for  $\text{C}_{22}\text{H}_{24}\text{NaO}_7\text{S}^+$  441.1347, found 441.1346.

**Phenyl 2-O-benzoyl-6-O-benzyl-3,4-di-O-tert-butyldimethylsilyl-1-thio- $\beta$ -D-lucopyranoside (1).**

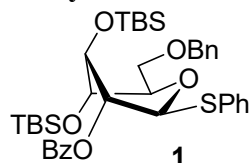

The synthesis of the title compound was performed in accordance with the reported procedure and its analytical data was in accordance with that previously described.<sup>3</sup>

**Phenyl 6-O-benzyl-2,3,4-tri-O-tert-butyldimethylsilyl-1-thio- $\beta$ -D-glucopyranoside (2).**

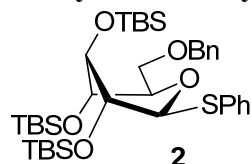

The synthesis of the title compound was performed in accordance with the reported procedure and its analytical data was in accordance with that previously described.<sup>4</sup>

**Phenyl 2,6-di-O-benzyl-3,4-di-O-tert-butyldimethylsilyl-1-thio- $\beta$ -D-glucopyranoside (3).**

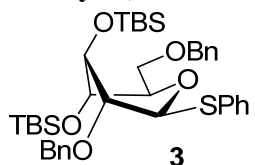

The synthesis of the title compound was performed in accordance with the reported procedure and its analytical data was in accordance with that previously described.<sup>3</sup>

**Ethyl 2-O-benzoyl-6-O-benzyl-3,4-di-O-tert-butyldimethylsilyl-1-thio- $\beta$ -D-glucopyranoside (5).**

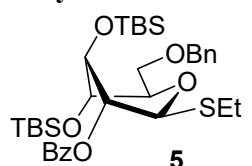

TBSOTf (2.7 mL, 12.0 mmol) was added to a solution of **S2** (1.67 g, 4.0 mmol) in 2,6-lutidine (12.0 mL) and the resulting mixture was heated at 130 °C for 1 h. After that, the reaction mixture was allowed to cool to rt, diluted with ethyl acetate (~250 mL), and washed with 1 M aq. HCl (3  $\times$  50 mL), water (50 mL), sat. aq.  $\text{NaHCO}_3$  (50 mL), and brine (2  $\times$  50 mL). The organic phase was separated, dried with  $\text{MgSO}_4$ , and concentrated *in vacuo*. The residue was purified by column chromatography on silica gel (ethyl acetate – toluene gradient elution) to afford the title compound in 92% yield (2.35 g, 3.64 mmol) as a colorless syrup. Analytical data for **5**:  $R_f = 0.71$  (ethyl acetate/ toluene, 1/9, v/v);  $[\alpha]_D^{26.9} -3.7$  ( $c = 1$ ,  $\text{CHCl}_3$ );  $^1\text{H NMR}$  (300 MHz,  $\text{CDCl}_3$ ):  $\delta$ , 0.05, 0.06, 0.07, 0.08 (4 s, 12H, 2  $\times$   $\text{SiMe}_2$ ), 0.83, 0.85 (2 s, 18H, 2  $\times$   $\text{Si}^t\text{Bu}$ ), 1.25 (t, 3H,  $J = 7.4$  Hz,  $\text{CH}_2\text{CH}_3$ ), 2.71 (m, 2H,  $\text{CH}_2\text{CH}_3$ ), 3.65 (dd, 1H,  $J_{6a,6b} = 9.7$  Hz, H-6a), 3.74-3.82 (m, 2H, H-4, 6b), 3.84-3.91 (m, 2H,  $J_{5,6a} = 6.6$  Hz, H-3, 5), 4.58 (dd, 2H,  $^2J = 12.0$  Hz,  $\text{CH}_2\text{Ph}$ ), 4.85 (d, 1H,  $J_{1,2} = 8.8$  Hz, H-1), 5.13 (dd, 1H,  $J_{2,3} = 4.1$  Hz, H-2), 7.22-8.04 (m, 10H, aromatic) ppm;  $^{13}\text{C NMR}$  (75 MHz,  $\text{CDCl}_3$ ):  $\delta$ , -4.2, -4.0, -3.6, -3.4, 0.2, 15.2, 18.2 ( $\times 2$ ), 24.6

( $\times 3$ ), 26.1 ( $\times 3$ ), 71.0, 71.5, 73.6, 74.5, 75.8, 81.6, 81.7, 127.8, 127.8 ( $\times 2$ ), 128.5 ( $\times 4$ ), 130.2 ( $\times 2$ ), 130.3, 133.3, 138.5, 165.7 ppm; HR-FAB MS  $[M+Na]^+$  calcd for  $C_{34}H_{54}NaO_6SSi_2^+$  669.3078, found 669.3064.

**Ethyl 2,6-di-*O*-benzyl-3,4-di-*O*-*tert*-butyldimethylsilyl-1-thio- $\beta$ -D-glucopyranoside (6).**

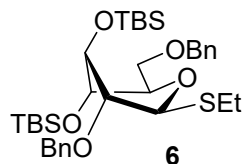

TBSOTf (1.05 mL, 4.60 mmol) was added to a solution of **S4** (0.85 g, 1.53 mmol) in 2,6-lutidine (5.0 mL) and the resulting mixture was heated at 130 °C for 1 h. After that, the reaction mixture was allowed to cool to rt, diluted with ethyl acetate (~100 mL) and washed with 1 M aq. HCl (3  $\times$  20 mL), water (20 mL), sat. aq. NaHCO<sub>3</sub> (20 mL) and brine (2  $\times$  20 mL). The organic phase was separated, dried with MgSO<sub>4</sub>, and concentrated *in vacuo*. The residue was purified by column chromatography on silica gel (ethyl acetate – toluene gradient elution) to afford the title compound in 90% yield (0.87g, 1.37 mmol) as a colorless syrup. Analytical data for **6**:  $R_f$  = 0.75 (ethyl acetate/ toluene, 1/9, v/v);  $[\alpha]_D^{26.8}$  -26.4 (c = 1, CHCl<sub>3</sub>); <sup>1</sup>H NMR (300 MHz, CDCl<sub>3</sub>):  $\delta$ , -0.04, -0.01, 0.01, 0.03 (4 s, 12H, 2  $\times$  SiMe<sub>2</sub>), 0.80, 0.84 (2 s, 18H, 2  $\times$  Si<sup>*t*</sup>Bu), 1.26 (t, 3H,  $J$  = 7.4 Hz, CH<sub>2</sub>CH<sub>3</sub>), 2.69 (m, 2H, CH<sub>2</sub>CH<sub>3</sub>), 3.33 (dd, 1H,  $J_{2,3}$  = 3.6 Hz, H-2), 3.56 (dd, 1H,  $J_{5,6a}$  = 6.6 Hz,  $J_{6a,6b}$  = 9.6 Hz, H-6a), 3.62-3.84 (m, 4H, H-3, 4, 5, 6b), 4.51 (dd, 2H, <sup>2</sup> $J$  = 12.0 Hz, CH<sub>2</sub>Ph), 4.51 (dd, 2H, <sup>2</sup> $J$  = 10.9 Hz, CH<sub>2</sub>Ph), 4.74 (d, 1H,  $J_{1,2}$  = 8.6 Hz, H-1), 7.17-7.37 (m, 10H, aromatic) ppm; <sup>13</sup>C NMR (75 MHz, CDCl<sub>3</sub>):  $\delta$ , -4.2, -3.9, -3.5, -3.4, 15.3, 18.2 ( $\times 2$ ), 25.3, 26.1 ( $\times 3$ ), 26.3 ( $\times 3$ ), 71.3, 71.7, 73.4 ( $\times 2$ ), 76.5, 81.3, 82.7, 82.8, 127.6, 127.7, 127.8 ( $\times 4$ ), 128.3 ( $\times 2$ ), 128.5 ( $\times 2$ ), 138.6, 138.6 ppm; HR-FAB MS  $[M+Na]^+$  calcd for  $C_{34}H_{56}NaO_5SSi_2^+$  655.3285, found 655.3291.

**Ethyl 2-*O*-benzoyl-3,4,6-tri-*O*-benzyl-1-thio- $\beta$ -D-glucopyranoside (7).**

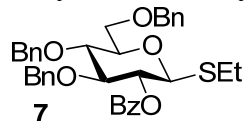

The synthesis of the title compound was performed in accordance with the reported procedure and its analytical data was in accordance with that previously described.<sup>5</sup>

**Ethyl 2,6-di-*O*-benzoyl-3,4-di-*O*-*tert*-butyldimethylsilyl-1-thio- $\beta$ -D-glucopyranoside (8).**

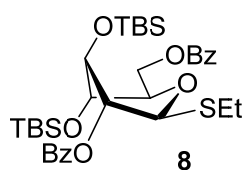

TBSOTf (1.13 mL, 4.93 mmol) was added to a solution of **S7** (0.71 g, 1.64 mmol) in 2,6-lutidine (4.0 mL) and the resulting mixture was heated at 130 °C for 1 h. After that, the reaction mixture was allowed to cool to rt, diluted with ethyl acetate (~100 mL) and washed with 1 M aq. HCl (3  $\times$  15 mL), water (20 mL), sat. aq. NaHCO<sub>3</sub> (20 mL), and brine (2  $\times$  20 mL). The organic phase was separated, dried with MgSO<sub>4</sub>, and concentrated *in vacuo*. The residue was purified by column chromatography on silica gel (ethyl acetate – toluene gradient elution) to afford the title compound in 89% yield (0.96 g, 1.46 mmol) as a colorless syrup. Analytical data for **8**:  $R_f$  = 0.75 (ethyl acetate/ toluene, 1/9, v/v);  $[\alpha]_D^{26.9}$  -0.3 (c = 1, CHCl<sub>3</sub>); <sup>1</sup>H NMR (300 MHz, CDCl<sub>3</sub>):  $\delta$ , -0.02, -0.01, -0.01, 0.00 (4 s, 12H, 2  $\times$  SiMe<sub>2</sub>), 0.75, 0.79 (2 s, 18H, 2  $\times$  Si<sup>*t*</sup>Bu), 1.12 (t, 3H,  $J$  = 7.4 Hz, CH<sub>2</sub>CH<sub>3</sub>), 2.58 (m, 2H, CH<sub>2</sub>CH<sub>3</sub>), 3.75 (dd, 1H,  $J_{4,5}$  = 5.4 Hz, H-4), 3.84-3.91 (m, 2H,  $J_{3,4}$  = 5.4 Hz,  $J_{5,6a}$  = 7.0 Hz,  $J_{5,6b}$  = 4.6 Hz, H-3, 5), 4.36 (dd, 1H,  $J_{6a,6b}$  = 11.4 Hz, H-6a), 4.60 (dd, 1H, H-6b), 4.78 (d, 1H,  $J_{1,2}$  = 8.6 Hz, H-1), 5.07 (dd, 1H,  $J_{2,3}$  = 4.9 Hz, H-2), 7.40-8.05 (m, 10H, aromatic) ppm; <sup>13</sup>C NMR (75 MHz, CDCl<sub>3</sub>):  $\delta$ , -4.2, -3.9, -3.4, -3.2, 15.2, 18.2 ( $\times 2$ ), 24.8, 26.1 ( $\times 3$ ), 26.2 ( $\times 3$ ), 65.2, 71.5, 74.1, 75.6, 79.7, 81.9, 128.5 ( $\times 2$ ), 128.6 ( $\times 2$ ), 129.8 ( $\times 4$ ), 130.2 ( $\times 2$ ), 130.3, 133.3, 165.7, 166.5 ppm. HR-FAB MS  $[M+Na]^+$  calcd for  $C_{34}H_{52}NaO_7SSi_2^+$  683.2870, found 683.2877.

### Ethyl 6-*O*-benzoyl-2-*O*-benzyl-3,4-di-*O*-*tert*-butyldimethylsilyl-1-thio- $\beta$ -D-glucopyranoside (9).

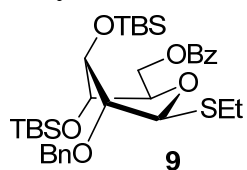

TBSOTf (0.30 mL, 1.28 mmol) was added to a solution of **S8** (0.18 g, 0.429 mmol) in 2,6-lutidine (3.0 mL) and the resulting mixture was heated at 130 °C for 1 h. After that, the reaction mixture was allowed to cool to rt, diluted with ethyl acetate (~60 mL) and washed with 1 M aq. HCl (3 x 5 mL), water (5 mL), sat. aq. NaHCO<sub>3</sub> (5 mL) and brine (2 x 5 mL). The

organic phase was separated, dried with MgSO<sub>4</sub>, and concentrated in vacuo. The residue was purified by column chromatography on silica gel (ethyl acetate – toluene gradient elution) to afford the title compound in 86% yield (0.24g, 0.37 mmol) as a colorless syrup. Analytical data for **9**: R<sub>f</sub> = 0.75 (ethyl acetate/ toluene, 1/9, v/v); [ $\alpha$ ]<sub>D</sub><sup>21.6</sup> -0.8 (c = 1, CHCl<sub>3</sub>); <sup>1</sup>H NMR (300 MHz, CDCl<sub>3</sub>):  $\delta$ , -0.05-0.02 (4 s, 12H, 2 x SiMe<sub>2</sub>), 0.80, 0.82 (2 s, 18H, 2 x Si<sup>t</sup>Bu), 1.18 (t, 3H, J = 7.4 Hz, CH<sub>2</sub>CH<sub>3</sub>), 2.62 (m, 2H, CH<sub>2</sub>CH<sub>3</sub>), 3.32 (dd, 1H, J<sub>2,3</sub> = 4.0 Hz, H-2), 3.71 (dd, 1H, H-4), 3.78-3.86 (m, 2H, J<sub>3,4</sub> = 5.0 Hz, H-3, 5), 4.32 (dd, 1H, J<sub>5,6a</sub> = 7.4 Hz, J<sub>6a,6b</sub> = 11.3 Hz, H-6a), 4.52 (dd, 1H, J<sub>5,6b</sub> = 4.8 Hz, H-6b), 4.65 (dd, <sup>2</sup>J = 11.1 Hz, CH<sub>2</sub>Ph), 4.74 (d, 1H, J<sub>1,2</sub> = 8.4 Hz, H-1), 7.10 – 8.01 (m, 10H, aromatic) ppm; <sup>13</sup>C NMR (75 MHz, CDCl<sub>3</sub>):  $\delta$ , -4.2, -3.8, -3.3, -3.2, 15.3, 18.2, 18.3, 25.4, 26.1 (x3), 26.4 (x3), 65.6, 71.7, 73.6, 76.5, 79.4, 82.5, 82.9, 127.6, 127.8 (x2), 128.3 (x2), 128.5 (x2), 129.8 (x2), 130.2, 133.2, 138.5, 166.4 ppm; HR-FAB MS [M+Na]<sup>+</sup> calcd for C<sub>34</sub>H<sub>54</sub>NaO<sub>6</sub>SSi<sub>2</sub><sup>+</sup> 669.3077, found 669.3087.

### Synthesis of Glycosyl Acceptors

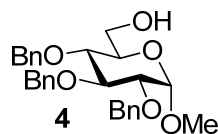

**Methyl 2,3,4-tri-*O*-benzyl- $\alpha$ -D-glucopyranoside (4).** The synthesis of the title compound was performed in accordance with the reported procedure and its analytical data was in accordance with that previously described.<sup>6</sup>

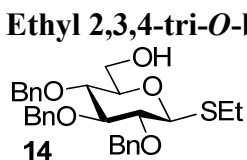

**Ethyl 2,3,4-tri-*O*-benzyl-1-thio- $\beta$ -D-glucopyranoside (14).** The synthesis of the title compound was performed in accordance with the reported procedure and its analytical data was in accordance with that previously described.<sup>7</sup>

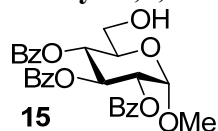

**Methyl 2,3,4-tri-*O*-benzoyl- $\alpha$ -D-glucopyranoside (15).** The synthesis of the title compound was performed in accordance with the reported procedure and its analytical data was in accordance with that previously described.<sup>8</sup>

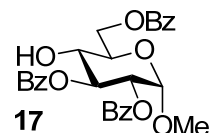

**Methyl 2,3,6-tri-*O*-benzoyl- $\alpha$ -D-glucopyranoside (17).** The synthesis of the title compound was performed in accordance with the reported procedure and its analytical data was in accordance with that previously described.<sup>9</sup>

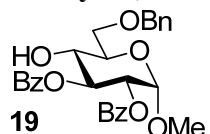

**Methyl 2,3-di-*O*-benzoyl-6-*O*-benzyl- $\alpha$ -D-glucopyranoside (19).** The synthesis of the title compound was performed in accordance with the reported procedure and its analytical data was in accordance with that previously described.<sup>10</sup>

## **General Procedures for Competition Experiments**

**Donor competition experiments.** A mixture of two glycosyl donors (0.035 mmol each), glycosyl acceptor **4** (0.071 mmol), and freshly activated molecular sieves (3 Å, 150 mg) in CH<sub>2</sub>Cl<sub>2</sub> (2.0 mL) was stirred under argon for 16 h at rt. The mixture was cooled to -78 °C, NIS (0.035 mmol) and TfOH (0.0035 mmol) were added, and the resulting mixture was stirred under argon for 1 h. During this time, the temperature of the reaction mixture was allowed to gradually increase to 0 °C. After that, triethylamine (~0.1 mL) was added, the solid was filtered off, and rinsed successively with CH<sub>2</sub>Cl<sub>2</sub>. The combined filtrate (~60 mL) was washed with sat. aq. NaHCO<sub>3</sub> (5 mL), 10% aq. Na<sub>2</sub>S<sub>2</sub>O<sub>3</sub> (5 mL) and water (3 x 10 mL). The organic layer was separated, dried with MgSO<sub>4</sub>, and concentrated *in vacuo*. The residue was purified by column chromatography on silica gel (ethyl acetate – toluene gradient elution) and the amount of unreacted donors quantified.

**Acceptor competition experiments.** A mixture of two glycosyl acceptors (0.042 mmol each), glycosyl donor **5** (0.038 mmol), and freshly activated molecular sieves (3 Å, 150 mg) in CH<sub>2</sub>Cl<sub>2</sub> (2.0 mL) was stirred under argon for 16 h at rt. The mixture was cooled to -78 °C, NIS (0.038 mmol) and TfOH (0.0038 mmol) were added, and the resulting mixture was stirred under argon for 1 h. During this time, the temperature of the reaction mixture was allowed to gradually increase to 0 °C. After that, triethylamine (~0.1 mL) was added, the solid was filtered off and rinsed successively with CH<sub>2</sub>Cl<sub>2</sub>. The combined filtrate (~60 mL) was washed with sat. aq. NaHCO<sub>3</sub> (5 mL), 10% aq. Na<sub>2</sub>S<sub>2</sub>O<sub>3</sub> (5 mL) and water (3 x 10 mL). The organic layer was separated, dried with MgSO<sub>4</sub>, and concentrated *in vacuo*. The residue was purified by column chromatography on silica gel (ethyl acetate – toluene gradient elution) and the amount of unreacted acceptors quantified.

## **Synthesis of Disaccharides**

**Method A. General glycosylation procedure in the presence of NIS/TfOH.** A mixture of glycosyl donor (0.039 mmol), glycosyl acceptor (0.043 mmol), and freshly activated molecular sieves (3Å, 60 mg) in CH<sub>2</sub>Cl<sub>2</sub> (2.0 mL) was stirred under argon for 16 h at rt. The mixture was cooled to -78 °C, NIS (0.051 mmol) and TfOH (0.0039 mmol) were added, and the resulting mixture was stirred under argon for 15-30 min (see Table 1 of the article). During this time, the temperature of the reaction mixture was allowed to increase gradually. After that, triethylamine (~0.1 mL) was added, the solid was filtered off and rinsed successively with CH<sub>2</sub>Cl<sub>2</sub>. The combined filtrate (~60 mL) was washed with sat. aq. NaHCO<sub>3</sub> (5 mL), 10% aq. Na<sub>2</sub>S<sub>2</sub>O<sub>3</sub> (5 mL) and water (3 x 10 mL). The organic layer was separated, dried with MgSO<sub>4</sub>, and concentrated *in vacuo*. The residue was purified by column chromatography on silica gel (ethyl acetate – toluene gradient elution) to afford the corresponding disaccharide derivative.

**Method B. General glycosylation procedure in the presence of DMTST.** A mixture of glycosyl donor (0.039 mmol), glycosyl acceptor (0.043 mmol), and freshly activated molecular sieves (4Å, 60 mg) in CH<sub>2</sub>Cl<sub>2</sub> (2.0 mL) was stirred under argon for 16 h at rt. The mixture was cooled to -78 °C, DMTST (0.051-0.078 mmol, see Table 1 of the article) was added, and the resulting mixture was stirred under argon for 10-20 min (see Table 1 of the article). During this

time, the temperature of the reaction mixture was allowed to increase gradually. After that, triethylamine (~0.1 mL) was added, the solid was filtered off and rinsed successively with CH<sub>2</sub>Cl<sub>2</sub>. The combined filtrate (~60 mL) was washed with sat. aq. NaHCO<sub>3</sub> (5 mL), 10% aq. Na<sub>2</sub>S<sub>2</sub>O<sub>3</sub> (5 mL) and water (3 x 10 mL). The organic layer was separated, dried with MgSO<sub>4</sub>, and concentrated *in vacuo*. The residue was purified by column chromatography on silica gel (ethyl acetate – toluene gradient elution) to afford the corresponding disaccharide derivative.

**Methyl 6-O-(2-O-benzoyl-6-O-benzyl-3,4-di-O-tert-butyldimethylsilyl-β-D-glucopyranosyl)-2,3,4-tri-O-benzyl-α-D-glucopyranoside (10).**

The title compound was prepared from donor **5** and acceptor **4** by Method A or B in 83 or 85% yield, respectively, as a colorless crystalline solid. Analytical data for **10**: *R<sub>f</sub>* = 0.43 (ethyl acetate/ toluene, 1/9, v/v); m.p. 111-112.5 °C (methanol/water); [α]<sub>D</sub><sup>26.9</sup> +3.2 (c = 1, CHCl<sub>3</sub>); <sup>1</sup>H NMR (600 MHz, CDCl<sub>3</sub>): δ, 0.01, 0.02, 0.04, 0.12 (4 s, 12H, 2 x SiMe<sub>2</sub>), 0.84 (s, 18H, 2 x Si<sup>t</sup>Bu), 3.24 (s, 3H, OCH<sub>3</sub>), 3.44-3.49 (m, 2H, *J*<sub>2,3</sub> = 9.3 Hz, H-2, 4), 3.67-3.73 (m, 3H, H-5, 6a, 6a'), 3.77 (dd, 1H, *J*<sub>6a',6b'</sub> = 9.7 Hz, H-6b'), 3.82 (dd, 1H, *J*<sub>4',5'</sub> = 4.0 Hz, H-4'), 3.86 (dd, 1H, *J*<sub>3',4'</sub> = 4.3 Hz, H-3'), 3.91 (dd, 1H, *J*<sub>3,4</sub> = 9.3 Hz, H-3), 3.95 (m, 1H, *J*<sub>5',6a'</sub> = 3.6 Hz, *J*<sub>5',6b'</sub> = 6.4 Hz, H-5'), 4.16 (br. d, 1H, *J* = 8.9 Hz, H-6b), 4.49 (dd, 2H, <sup>2</sup>*J* = 10.7 Hz, CH<sub>2</sub>Ph), 4.50 (d, 1H, *J*<sub>1,2</sub> = 3.5 Hz, H-1), 4.53 (dd, 2H, <sup>2</sup>*J* = 10.8 Hz, CH<sub>2</sub>Ph), 4.67 (dd, 2H, <sup>2</sup>*J* = 12.1 Hz, CH<sub>2</sub>Ph), 4.82 (dd, 2H, <sup>2</sup>*J* = 11.0 Hz, CH<sub>2</sub>Ph), 4.94 (d, 1H, *J*<sub>1',2'</sub> = 6.3 Hz, H-1'), 5.11 (dd, 1H, *J*<sub>2',3'</sub> = 3.3 Hz, H-2'), 7.07-7.99 (m, 25H, aromatic) ppm; <sup>13</sup>C NMR (150 MHz, CDCl<sub>3</sub>): δ, -4.3, -4.1 (x2), -3.8, 18.1, 18.2, 26.0 (x6), 55.2, 67.9, 69.8, 71.1, 71.2, 73.5, 73.6, 75.1 (x2), 75.7 (x2), 77.6, 79.5, 79.9, 82.2, 98.2, 100.2, 127.6, 127.7 (x4), 127.8, 128.0 (x5), 128.3 (x2), 128.4 (x3), 128.5 (x4), 128.6 (x2), 130.0 (x2), 130.1, 133.1, 138.4 (x2), 138.5, 139.1, 165.4 ppm; HR-FAB MS [M+Na]<sup>+</sup> calcd for C<sub>60</sub>H<sub>80</sub>NaO<sub>12</sub>Si<sub>2</sub><sup>+</sup> 1071.5085, found 1071.5066.

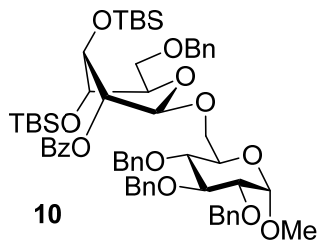

**Methyl 6-O-(2,6-di-O-benzyl-3,4-di-O-tert-butyldimethylsilyl-α/β-D-glucopyranosyl)-2,3,4-tri-O-benzyl-α-D-glucopyranoside (11).**

The title compound was prepared from donor **6** and acceptor **4** by Method A or B in 81 or 21% yield, respectively, as a colorless syrup. Selected analytical data for α-**11**: *R<sub>f</sub>* = 0.50 (ethyl acetate/ toluene, 1/9, v/v); <sup>1</sup>H NMR (600 MHz, CDCl<sub>3</sub>): δ, 3.28 (s, 3H, OCH<sub>3</sub>), 3.29 (dd, 1H, H-2') ppm; <sup>13</sup>C NMR (150 MHz, CDCl<sub>3</sub>): δ, 96.7 (C-1), 98.1 (C-1') ppm; Selected analytical data for β-**11**: *R<sub>f</sub>* = 0.50 (ethyl acetate/ toluene, 1/9, v/v); <sup>1</sup>H NMR (600 MHz, CDCl<sub>3</sub>): δ, 3.36 (s, 3H, OCH<sub>3</sub>) ppm; <sup>13</sup>C NMR (150 MHz, CDCl<sub>3</sub>): δ, 98.2 (C-1), 102.6 (C-1') ppm; HR-FAB MS [M+Na]<sup>+</sup> calcd for C<sub>60</sub>H<sub>82</sub>NaO<sub>11</sub>Si<sub>2</sub><sup>+</sup> 1057.5293, found 1057.5288.

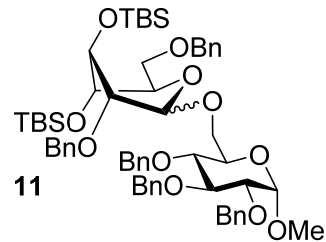

**Methyl O-(2-O-Benzoyl-3,4,6-tri-O-benzyl-β-D-glucopyranosyl)-2,3,4-tri-O-benzyl-α-D-glucopyranoside (12).**

The analytical data of **12** was in accordance with that previously described.<sup>11</sup>

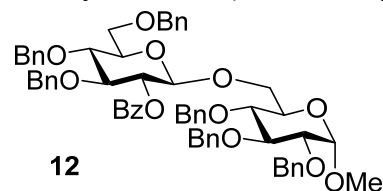



**Methyl 6-O-(2,6-di-O-benzoyl-3,4-di-O-tert-butyldimethylsilyl-β-D-glucopyranosyl)-2,3,4-tri-O-benzyl-α-D-glucopyranoside (13).**

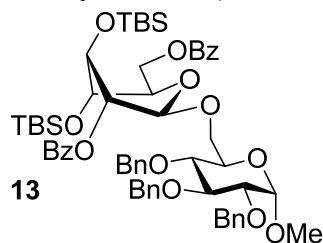

The title compound was prepared from donor **8** and acceptor **4** by Method A in 85% yield as a colorless syrup. Analytical data for **13**:  $R_f = 0.60$  (ethyl acetate/toluene, 1/9, v/v);  $[\alpha]_D^{26.9} +12.5$  ( $c = 1$ ,  $\text{CHCl}_3$ );  $^1\text{H NMR}$  (600 MHz,  $\text{CDCl}_3$ ):  $\delta$ , 0.01, 0.05, 0.10, 0.14 (4 s, 12H, 2 x  $\text{SiMe}_2$ ), 0.84, 0.86 (2 s, 18H, 2 x  $\text{Si}^t\text{Bu}$ ), 3.16 (s, 3H,  $\text{OCH}_3$ ), 3.44 (dd, 1H,  $J_{2,3} = 9.7$  Hz, H-2), 3.46 (dd, 1H,  $J_{4,5} = 9.4$  Hz, H-4), 3.64-3.67 (m, 2H, H-5, 6a), 3.85 (dd, 1H,  $J_{4',5'} = 3.7$  Hz, H-4'), 3.88 (dd, 1H,  $J_{3,4} = 9.3$  Hz, H-3), 3.93 (dd, 1H,  $J_{3',4'} = 3.7$  Hz, H-3'), 4.08 (m, 1H, H-5), 4.14 (d, 1H,  $J_{6a,6b} = 9.3$  Hz, H-6b), 4.49 (dd, 2H,  $^2J = 10.9$  Hz,  $\text{CH}_2\text{Ph}$ ), 4.50 (d, 1H,  $J_{1,2} = 3.2$  Hz, H-1), 4.57-4.59 (m, 2H, H-6a', 6b'), 4.66 (dd, 2H,  $^2J = 11.8$  Hz,  $\text{CH}_2\text{Ph}$ ), 4.82 (dd, 2H,  $^2J = 10.9$  Hz,  $\text{CH}_2\text{Ph}$ ), 4.91 (d, 1H,  $J_{1',2'} = 4.4$  Hz, H-1'), 5.06 (dd, 1H,  $J_{2',3'} = 4.4$  Hz, H-2'), 7.11-8.05 (m, 25H, aromatic) ppm;  $^{13}\text{C NMR}$  (150 MHz,  $\text{CDCl}_3$ ):  $\delta$ , -4.4, -4.1 ( $\times 2$ ), -3.8, 18.2 ( $\times 2$ ), 26.0 ( $\times 6$ ), 29.9, 55.0, 65.6, 67.8, 69.7, 70.7, 73.5, 73.7, 74.6, 75.1, 75.7, 77.6, 79.9, 82.2, 98.0, 100.0, 127.6, 127.8, 128.0 ( $\times 5$ ), 128.3 ( $\times 2$ ), 128.4 ( $\times 2$ ), 128.5 ( $\times 4$ ), 128.6 ( $\times 4$ ), 129.8 ( $\times 2$ ), 130.0, 130.1 ( $\times 2$ ), 130.4, 133.2 ( $\times 2$ ), 138.4 ( $\times 2$ ), 139.2, 165.5, 166.4 ppm; HR-FAB MS  $[\text{M}+\text{Na}]^+$  calcd for  $\text{C}_{60}\text{H}_{78}\text{NaO}_{13}\text{Si}_2^+$  1085.4878, found 1085.4913.

### One-Pot One-Addition Trisaccharide Synthesis

**General procedure.** A mixture of glycosyl donor **5** (0.038 mmol), glycosyl donor/acceptor **14** (0.038 mmol), glycosyl acceptor **15**, **17** or **19** (0.042 mmol), and freshly activated molecular sieves (3 Å, 150 mg) in  $\text{CH}_2\text{Cl}_2$  (2.0 mL) was stirred under for 16 h at rt. The mixture was cooled to  $-78$  °C, NIS (0.116 mmol) and TfOH (0.0116 mmol) were added, and the resulting mixture was stirred under argon for 5 h. During this time, the temperature of the reaction mixture was allowed to gradually increase to rt. After that, triethylamine ( $\sim 0.1$  mL) was added, the solid was filtered off and rinsed successively with  $\text{CH}_2\text{Cl}_2$ . The combined filtrate ( $\sim 60$  mL) was washed with sat. aq.  $\text{NaHCO}_3$  (5 mL), 10% aq.  $\text{Na}_2\text{S}_2\text{O}_3$  (5 mL) and water (3 x 10 mL). The organic layer was separated, dried with  $\text{MgSO}_4$ , and concentrated *in vacuo*. The residue was purified by column chromatography on Sephadex LH-20 (methanol – dichlorometane, 1/1, v/v) to afford the corresponding trisaccharide derivative **16**, **18** or **20**.

**Methyl O-(2-O-benzoyl-6-O-benzyl-3,4-di-O-tert-butyldimethylsilyl-β-D-glucopyranosyl)-(1→6)-O-(2,3,4-tri-O-benzyl-α/β-D-glucopyranosyl)-(1→6)-2,3,4-tri-O-benzyl-α-D-glucopyranoside (16).**

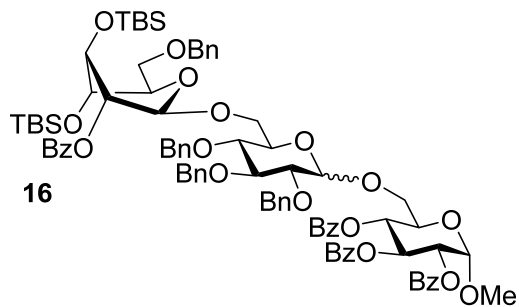

The title compound was prepared from building blocks **5**, **14**, and **15** in accordance with the general procedure in 42% yield as a colorless syrup. Analytical data for  $\alpha$ -**16**:  $R_f = 0.46$  (ethyl acetate/toluene, 1/9, v/v);  $^1\text{H NMR}$  (600 MHz,  $\text{CDCl}_3$ ):  $\delta$ , -0.01, 0.03, 0.05, 0.12 (4 s, 12H, 2 x  $\text{SiMe}_2$ ), 0.80, 0.83 (2 s, 18H, 2 x  $\text{Si}^t\text{Bu}$ ), 3.35-3.39 (m, 4H), 3.40 (d, 1H), 3.48 (dd, 1H), 3.56 (t, 1H), 3.60-3.66 (m, 2H), 3.72 (dd, 1H), 3.76-3.82 (m, 2H), 3.86-3.89 (m, 1H), 3.90-3.93 (m, 1H), 4.06 (dd, 1H), 4.15 (d, 1H), 4.23-4.28 (m, 1H), 4.39-4.47 (m, 3H), 4.52-4.58 (m, 2H), 4.67 (dd, 3H), 4.85 (d, 1H), 4.92 (d, 1H), 5.05 (dd, 2H), 5.20 (dd, 2H),

5.48 (t, 1H), 7.95-6.12 (m, 40H, aromatic) ppm;  $^{13}\text{C}$  NMR (150 MHz,  $\text{CDCl}_3$ ):  $\delta$ , -4.3, -4.1 ( $\times 2$ ), -3.8, 18.2 ( $\times 2$ ), 26.1 ( $\times 6$ ), 29.9, 55.9, 67.8, 68.7, 69.0, 70.1, 70.7, 70.9, 71.2, 72.4, 73.4, 74.5, 74.6, 75.0, 75.1, 75.2, 75.6, 79.0, 82.4, 84.7, 96.9, 100.1, 104.2, 127.8 ( $\times 2$ ), 127.9 ( $\times 2$ ), 128.2 ( $\times 2$ ), 128.4 ( $\times 7$ ), 128.5 ( $\times 6$ ), 128.6 ( $\times 3$ ), 129.2, 129.3, 129.5, 129.9 ( $\times 2$ ), 130.1 ( $\times 2$ ), 130.1 ( $\times 2$ ), 130.1 ( $\times 2$ ), 133.1, 133.23, 133.5, 138.2, 138.6, 138.8, 139.0, 165.4, 165.6, 166.0 ( $\times 2$ ) ppm; HR-FAB MS  $[\text{M}+\text{Na}]^+$  calcd for  $\text{C}_{87}\text{H}_{104}\text{NaO}_{19}\text{Si}_2^+$  1545.6400, found 1545.6368.

**Methyl *O*-(2-*O*-benzoyl-6-*O*-benzyl-3,4-di-*O*-*tert*-butyldimethylsilyl- $\beta$ -D-glucopyranosyl)-(1 $\rightarrow$ 6)-*O*-(2,3,4-tri-*O*-benzyl- $\alpha$ / $\beta$ -D-glucopyranosyl)-(1 $\rightarrow$ 4)-2,3,6-tri-*O*-benzoyl- $\alpha$ -D-glucopyranoside (18).**

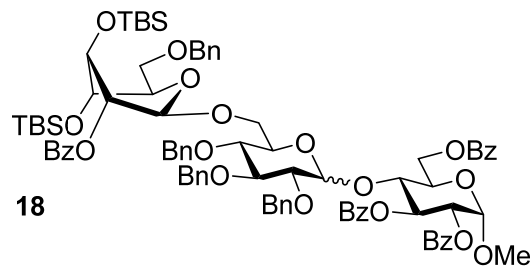

The title compound was prepared from building blocks **5**, **14** and **17** in accordance with the general procedure in 37% yield as a colorless syrup. Analytical data for  $\alpha$ -**18**:  $R_f$  = 0.55 (ethyl acetate/ toluene, 1/9, v/v);  $^1\text{H}$  NMR (600 MHz,  $\text{CDCl}_3$ ):  $\delta$ , -0.03, 0.00, 0.03, 0.08 (4 s, 12H, 2 x  $\text{SiMe}_2$ ), 0.81 (s, 18H, 2 x  $\text{Si}^t\text{Bu}$ ), 3.24 (dd, 1H), 3.40 (s, 3H), 3.45-3.50 (m, 1H), 3.64-3.56 (m, 2H), 3.70-3.76 (m, 1H), 3.79-3.89 (m, 4H), 3.95 (d, 1H), 4.05 (d, 1H), 4.19 (dd, 3H), 4.31 (d, 1H), 4.39 (d, 1H), 4.48-4.71 (m, 6H), 4.79 (d, 1H), 4.84 (d, 1H), 5.05 (m, 1H), 5.08 (d, 1H), 5.12 (d, 1H), 5.18 (dd, 1H), 6.18 (dd, 1H), 7.01-8.04 (m, 40H, aromatic) ppm;  $^{13}\text{C}$  NMR (150 MHz,  $\text{CDCl}_3$ ):  $\delta$ , -4.4, -4.3, -4.2, -4.0, 18.1, 18.2, 26.0 ( $\times 6$ ), 29.9, 55.5, 63.5, 67.6, 68.9, 70.8, 71.0, 71.4, 72.3, 72.4, 73.1, 73.5, 75.0, 75.3, 75.4, 75.5, 75.8, 79.1, 79.8, 81.4, 96.9, 98.9, 99.9, 127.4, 127.6, 127.7 ( $\times 4$ ), 127.9 ( $\times 4$ ), 128.0 ( $\times 2$ ), 128.3 ( $\times 4$ ), 128.4 ( $\times 4$ ), 128.5 ( $\times 2$ ), 128.6 ( $\times 4$ ), 129.9 ( $\times 2$ ), 130.00 ( $\times 2$ ), 130.2 ( $\times 2$ ), 133.0, 133.1, 133.3, 133.4, 138.2, 138.4, 138.6, 139.1, 165.3, 165.6, 166.1, 166.2 ppm. HR-FAB MS  $[\text{M}+\text{Na}]^+$  calcd for  $\text{C}_{87}\text{H}_{104}\text{NaO}_{19}\text{Si}_2^+$  1545.6400, found 1545.6366.

**Methyl *O*-(2-*O*-benzoyl-6-*O*-benzyl-3,4-di-*O*-*tert*-butyldimethylsilyl- $\beta$ -D-glucopyranosyl)-(1 $\rightarrow$ 6)-*O*-(2,3,4-tri-*O*-benzyl- $\alpha$ / $\beta$ -D-glucopyranosyl)-(1 $\rightarrow$ 4)-2,3-di-*O*-benzoyl-6-*O*-benzyl- $\alpha$ -D-glucopyranoside (20).**

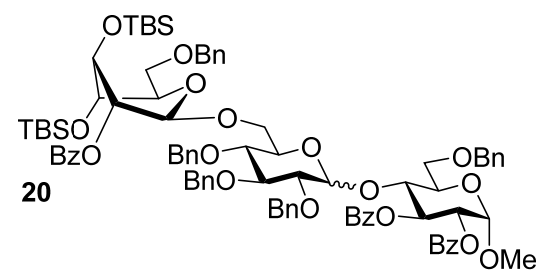

The title compound was prepared from building blocks **5**, **14** and **19** in accordance with the general procedure in 65% yield as a colorless syrup. Analytical data for  $\alpha$ -**18**:  $R_f$  = 0.60 (ethyl acetate/ toluene, 1/9, v/v);  $^1\text{H}$  NMR (600 MHz,  $\text{CDCl}_3$ ):  $\delta$ , 0.01, 0.05, 0.05, 0.12 (4 s, 12H, 2 x  $\text{SiMe}_2$ ), 0.83, 0.84 (2s, 18H, 2 x  $\text{Si}^t\text{Bu}$ ), 3.18 (dd, 1H), 3.41 (s, 3H), 3.51 (dd, 1H), 3.65-3.73 (m, 2H), 3.76 (dd, 1H), 3.79-3.92 (m, 6H), 3.92-4.05 (m, 4H), 4.20-4.27 (m, 2H), 4.35 (d, 1H), 4.46 (s, 2H), 4.50 (dd, 2H), 4.54-4.63 (m, 3H), 4.87 (d, 1H), 4.97 (d, 1H), 5.07 (d, 1H), 5.07 (d, 1H), 5.15-5.22 (m, 2H), 6.11 (dd, 1H), 7.04-7.94 (m, 40H, aromatic) ppm;  $^{13}\text{C}$  NMR (150 MHz,  $\text{CDCl}_3$ ):  $\delta$ , -4.4, -4.3, -4.2, -4.0, 18.1, 18.2, 26.0 ( $\times 6$ ), 29.9, 55.5, 67.9, 68.7, 70.4, 70.8, 71.1 ( $\times 2$ ), 72.3, 72.5, 72.7, 73.4, 73.5, 74.9, 75.0, 75.3, 75.4, 75.8, 79.4, 79.8, 81.5, 97.0, 98.4, 100.0, 127.7 ( $\times 2$ ), 127.8 ( $\times 3$ ), 127.9 ( $\times 2$ ), 128.0 ( $\times 2$ ), 128.1 ( $\times 2$ ), 128.4 ( $\times 11$ ), 128.5 ( $\times 2$ ), 129.4, 129.9 ( $\times 2$ ), 130.0 ( $\times 2$ ), 130.1 ( $\times 2$ ), 130.3, 133.0, 133.1, 133.4, 138.3, 138.4, 138.5, 138.6, 139.1, 165.3, 165.9, 166.2 ppm; HR-FAB MS  $[\text{M}+\text{Na}]^+$  calcd for  $\text{C}_{87}\text{H}_{106}\text{NaO}_{18}\text{Si}_2^+$  1531.6608, found 1531.6576.

## **X-ray Structure Determination of Disaccharide 10**

A crystal of approximate dimensions 0.324 x 0.121 x 0.098 mm<sup>3</sup> was mounted on MiTeGen cryoloops in a random orientation. Preliminary examination and data collection were performed using a Bruker X8 Kappa Apex II Charge Coupled Device (CCD) Detector system single crystal X-Ray diffractometer equipped with an Oxford Cryostream LT device. All data were collected using graphite monochromated Mo K $\alpha$  radiation ( $\lambda = 0.71073 \text{ \AA}$ ) from a fine focus sealed tube X-Ray source. Preliminary unit cell constants were determined with a set of 36 narrow frame scans. Typical data sets consist of combinations of  $\omega$  and  $\phi$  scan frames with typical scan width of 0.5° and counting time of 15 seconds/frame at a crystal to detector distance of 4.0 cm. The collected frames were integrated using an orientation matrix determined from the narrow frame scans. Apex II and SAINT software packages (*Bruker Analytical X-Ray, Madison, WI, 2010*) were used for data collection and data integration. Analysis of the integrated data did not show any decay. Final cell constants were determined by global refinement of reflections harvested from the complete data set. Collected data were corrected for systematic errors using SADABS (*Bruker Analytical X-Ray, Madison, WI, 2010*) based on the Laue symmetry using equivalent reflections.

Crystal data and intensity data collection parameters are listed in Table 1S. Structure solution and refinement were carried out using the SHELXTL- PLUS software package.<sup>12</sup> The structure was solved by direct methods and refined successfully in the space group P2<sub>1</sub>. Full matrix least-squares refinements were carried out by minimizing  $\sum w(F_o^2 - F_c^2)^2$ . The non-hydrogen atoms were refined anisotropically to convergence. All hydrogen atoms were treated using appropriate riding model (AFIX m<sup>3</sup>). The final residual values and structure refinement parameters are listed in Table 1S. Several motifs are disordered in this structure. The disorder was modeled with partial occupancy atoms and rigid body restraints (RIGU). Absolute structure determination was confirmed with a Flack x of -0.02(11).

Complete listings of positional and isotropic displacement coefficients for hydrogen atoms, anisotropic displacement coefficients for the non-hydrogen atoms are listed as supplementary material (Tables 2S and 4S). Table of calculated and observed structure factors are available in electronic format. The structural data have been deposited with Cambridge Crystallographic Data center with the CCDC number 1509777.

## References

1. P. J. Garegg, I. Kvarnstrom, A. Niklasson, G. Niklasson and S. C. T. Svensson, *J. Carbohydr. Chem.*, 1993, **12**, 933-953.
2. L. K. Mydock, M. N. Kamat and A. V. Demchenko, *Org. Lett.*, 2011, **13**, 2928-2931.
3. M. Heuckendorff, H. D. Premathilake, P. Pornsuriyasak, A. Ø. Madsen, C. M. Pedersen, M. Bols and A. V. Demchenko, *Org. Lett.*, 2013, **15**, 4904-4907.
4. C. M. Pedersen, L. U. Nordstrom and M. Bols, *J. Am. Chem. Soc.*, 2007, **129**, 9222-9235.
5. K. Ekelof and S. Oscarson, *J. Org. Chem.*, 1996, **61**, 7711-7718.
6. a) J. M. Kuester and I. Dyong, *Justus Liebigs Ann. Chem.*, 1975, 2179-2189; b) S. C. Ranade, S. Kaeothip and A. V. Demchenko, *Org. Lett.*, 2010, **12**, 5628-5631.
7. C. Fei and T. H. Chan, *Acta Chimica Sinica, Engl. Edit.*, 1989, 258-264.
8. T. J. Boltje, J.-H. Kim, J. Park and G.-J. Boons, *Org. Lett.*, 2011, **13**, 284-287.
9. Z. Zhang and C. H. Wong, *Tetrahedron*, 2002, **58**, 6513-6519.
10. S. Dara, V. Saikam, M. Yadav, P. P. Singh and R. A. Vishwakarma, *Carbohydr. Res.*, 2014, **391**, 93-96.
11. H. M. Nguyen, Y. N. Chen, S. G. Duron and D. Y. Gin, *J. Am. Chem. Soc.*, 2001, **123**, 8766-8772.
12. G. M. Sheldrick, *Acta Crystallogr., Sect. A: Fundam. Crystallogr.*, 2008, **64**, 112-122.

# NMR Spectra

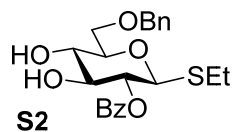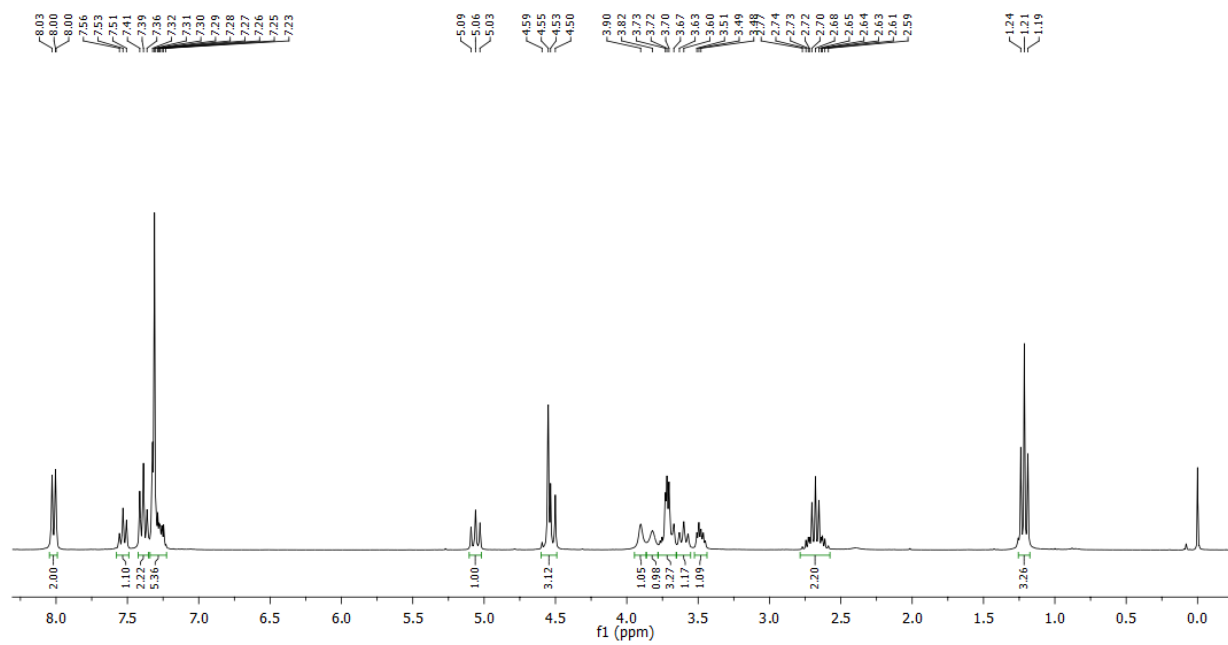

CDCl<sub>3</sub> 300 MHz

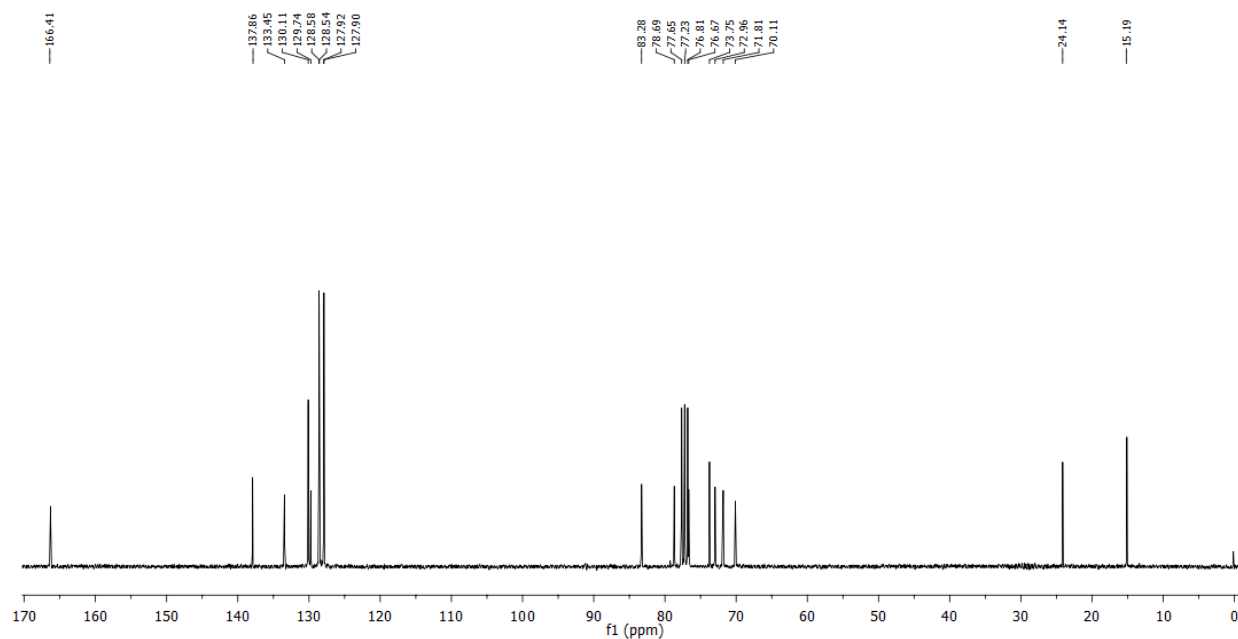

CDCl<sub>3</sub> 75 MHz

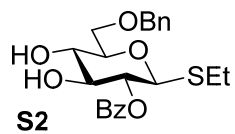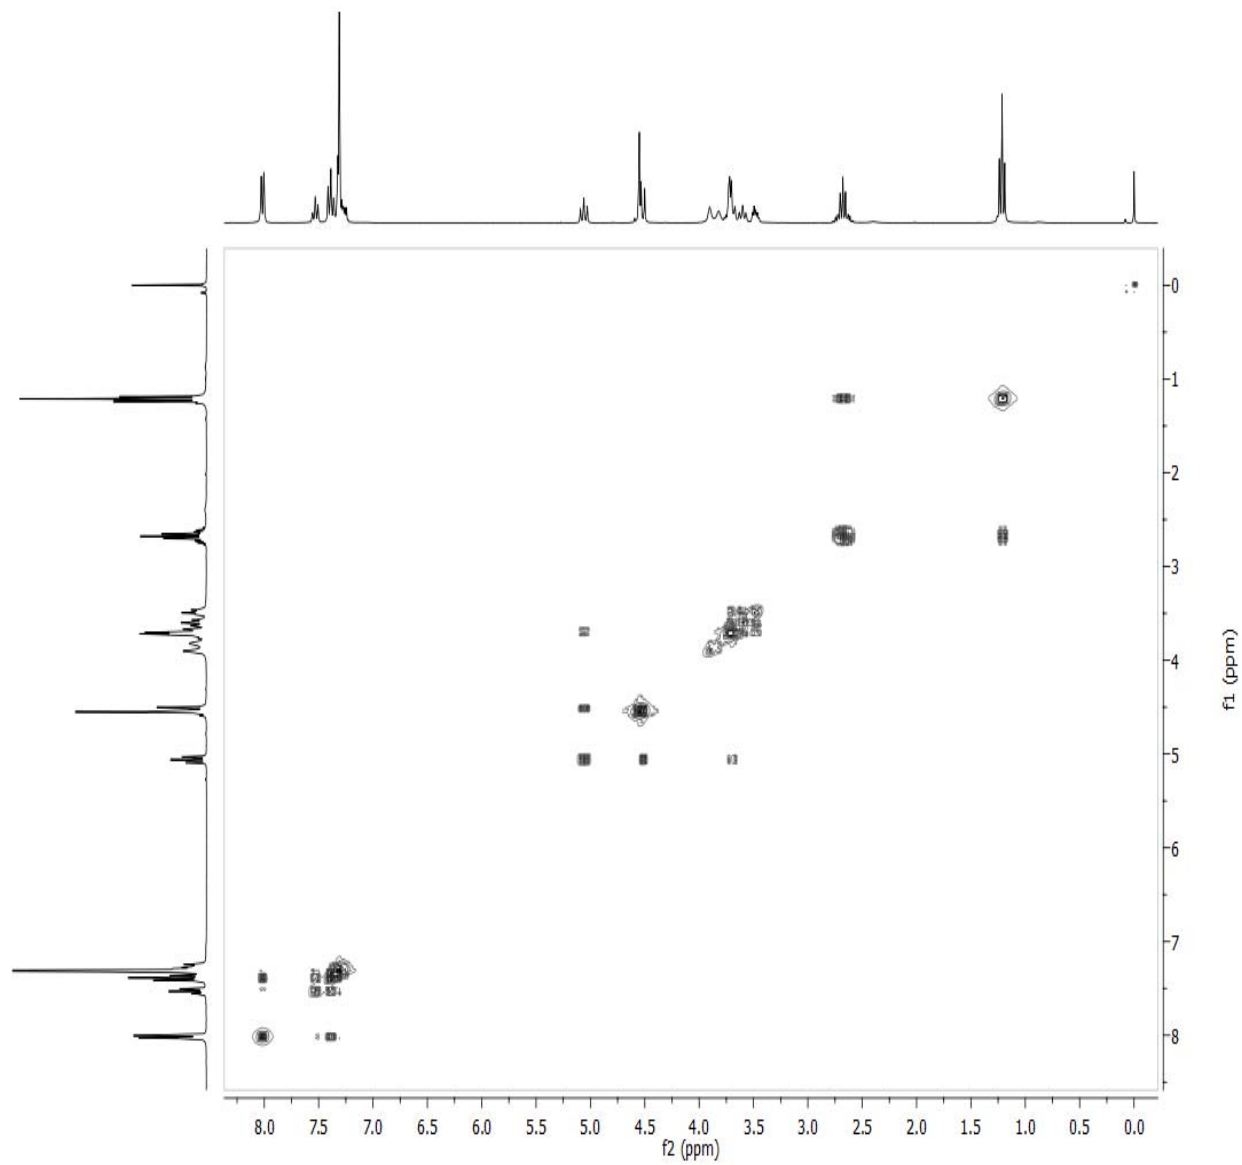

CDCl<sub>3</sub> 300 MHz

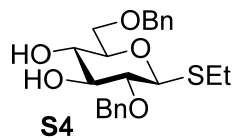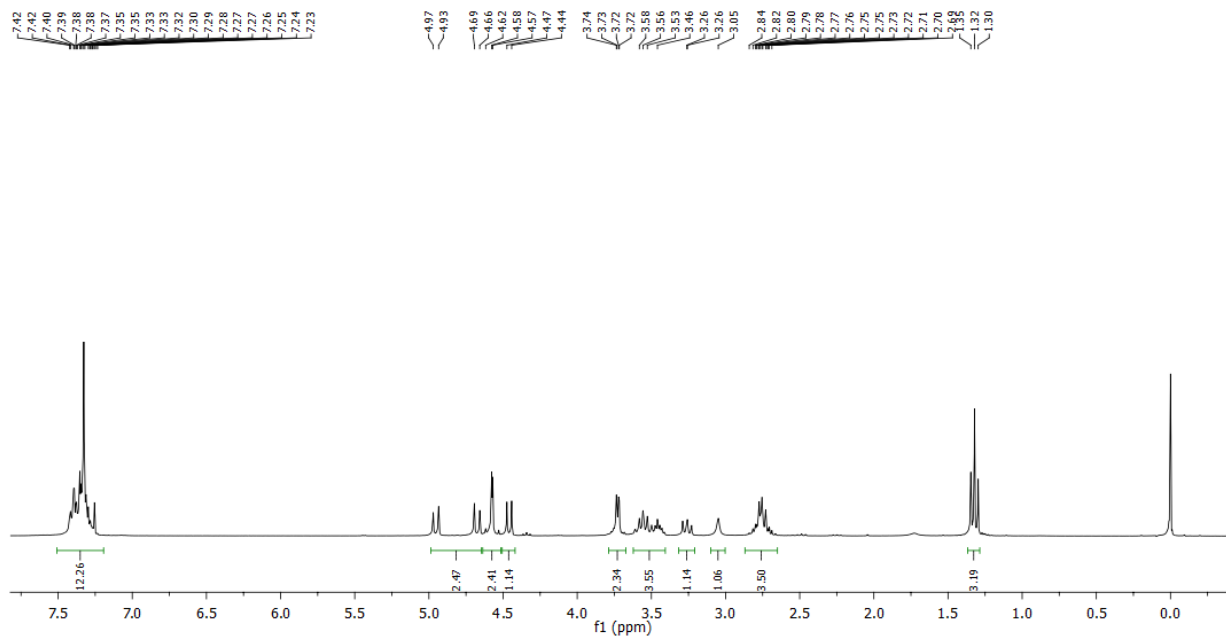

CDCl<sub>3</sub> 300 MHz

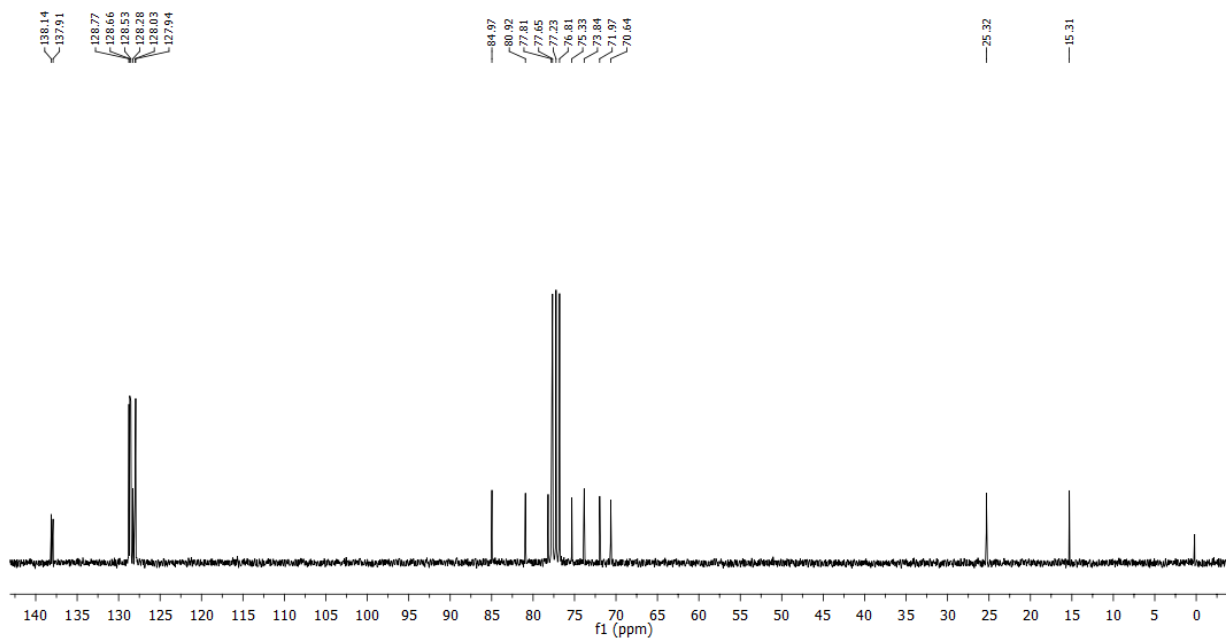

CDCl<sub>3</sub> 75 MHz

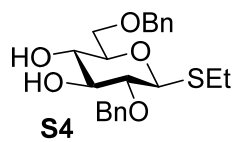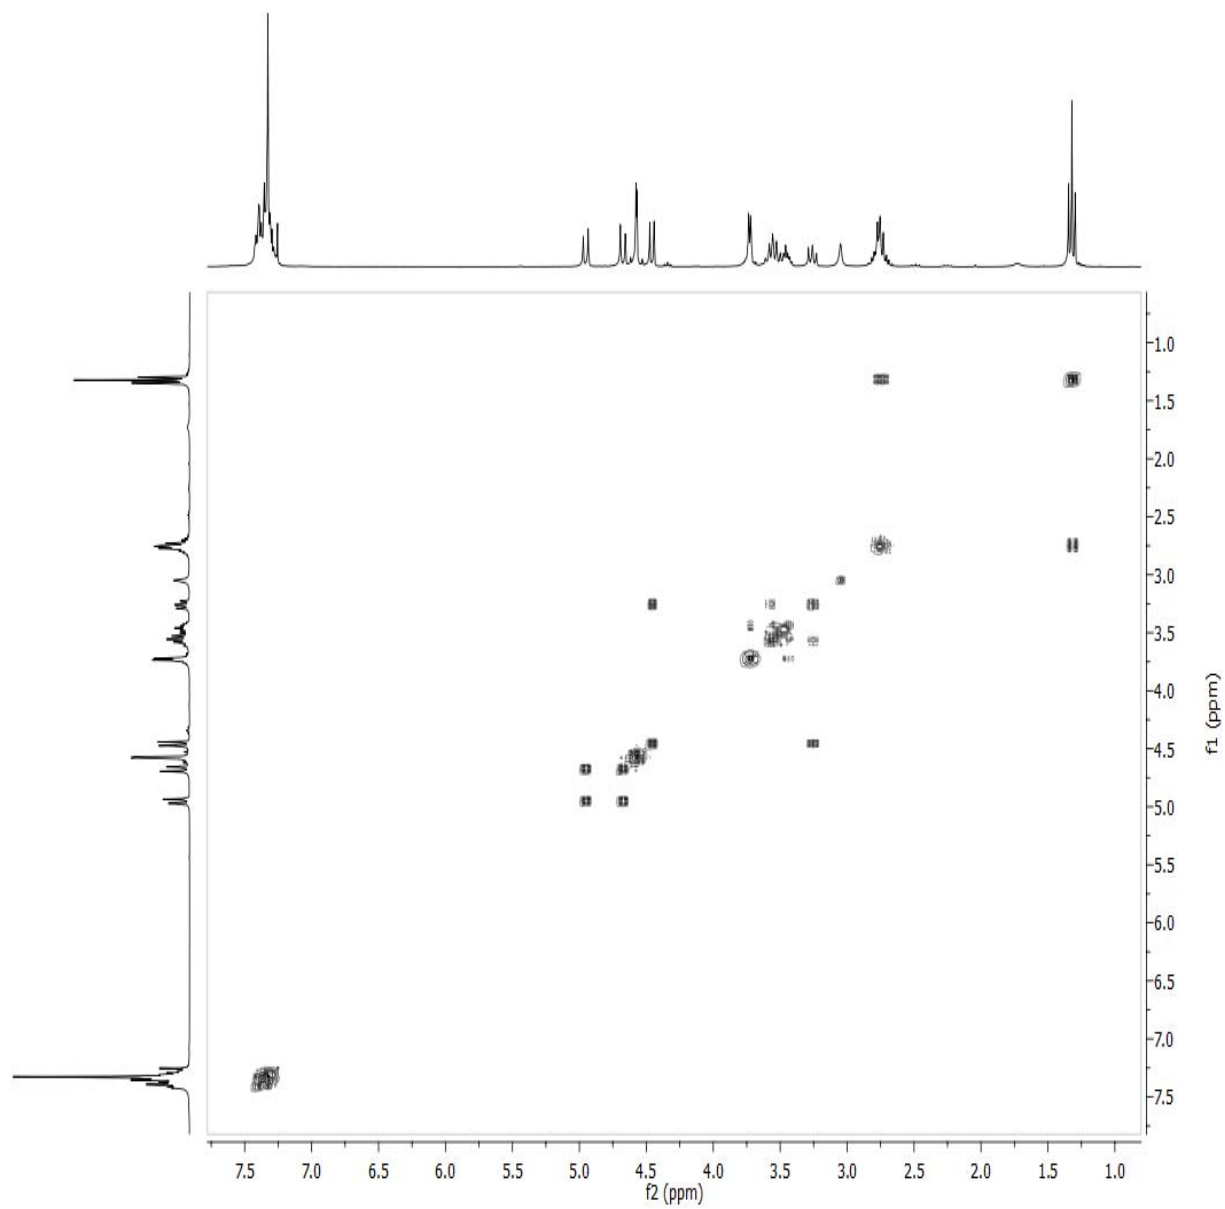

CDCl<sub>3</sub> 300 MHz



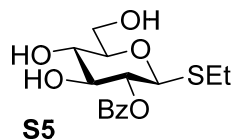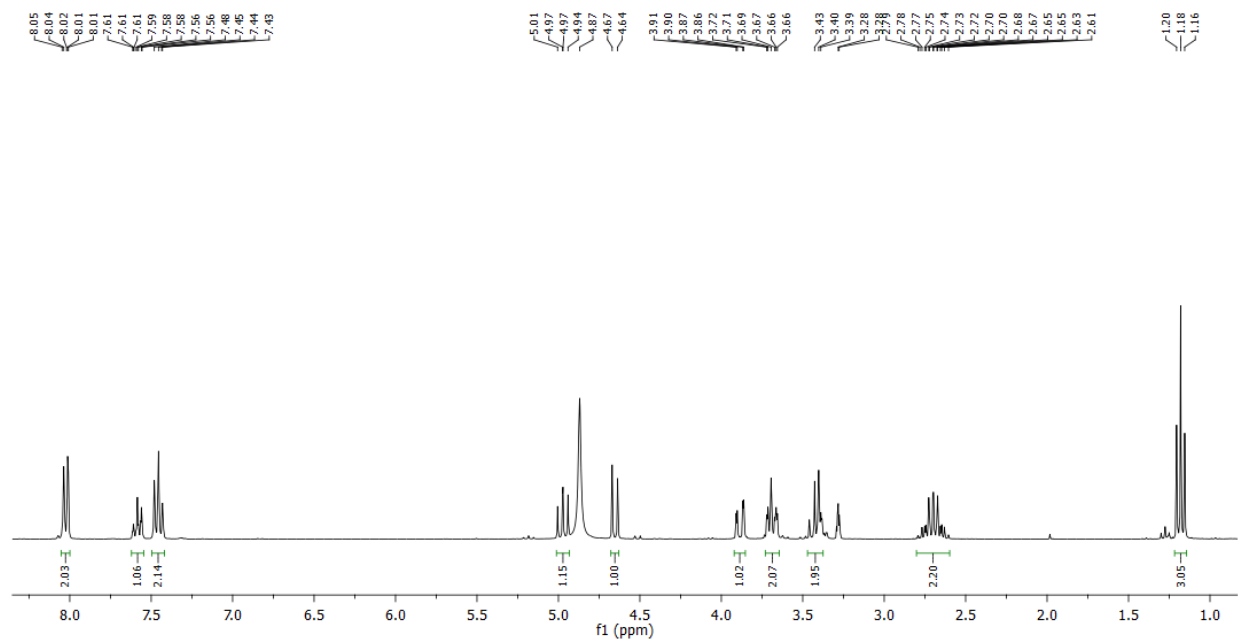

CD<sub>3</sub>OD 300 MHz

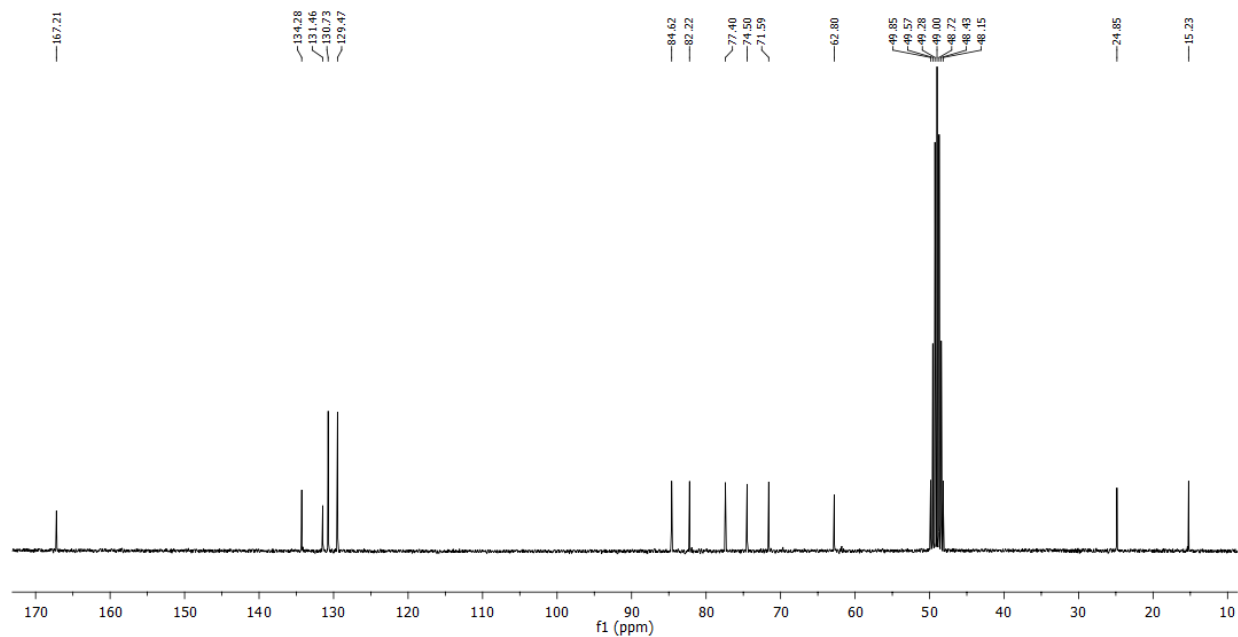

CD<sub>3</sub>OD 75 MHz

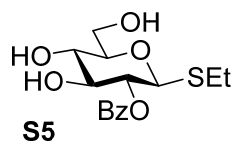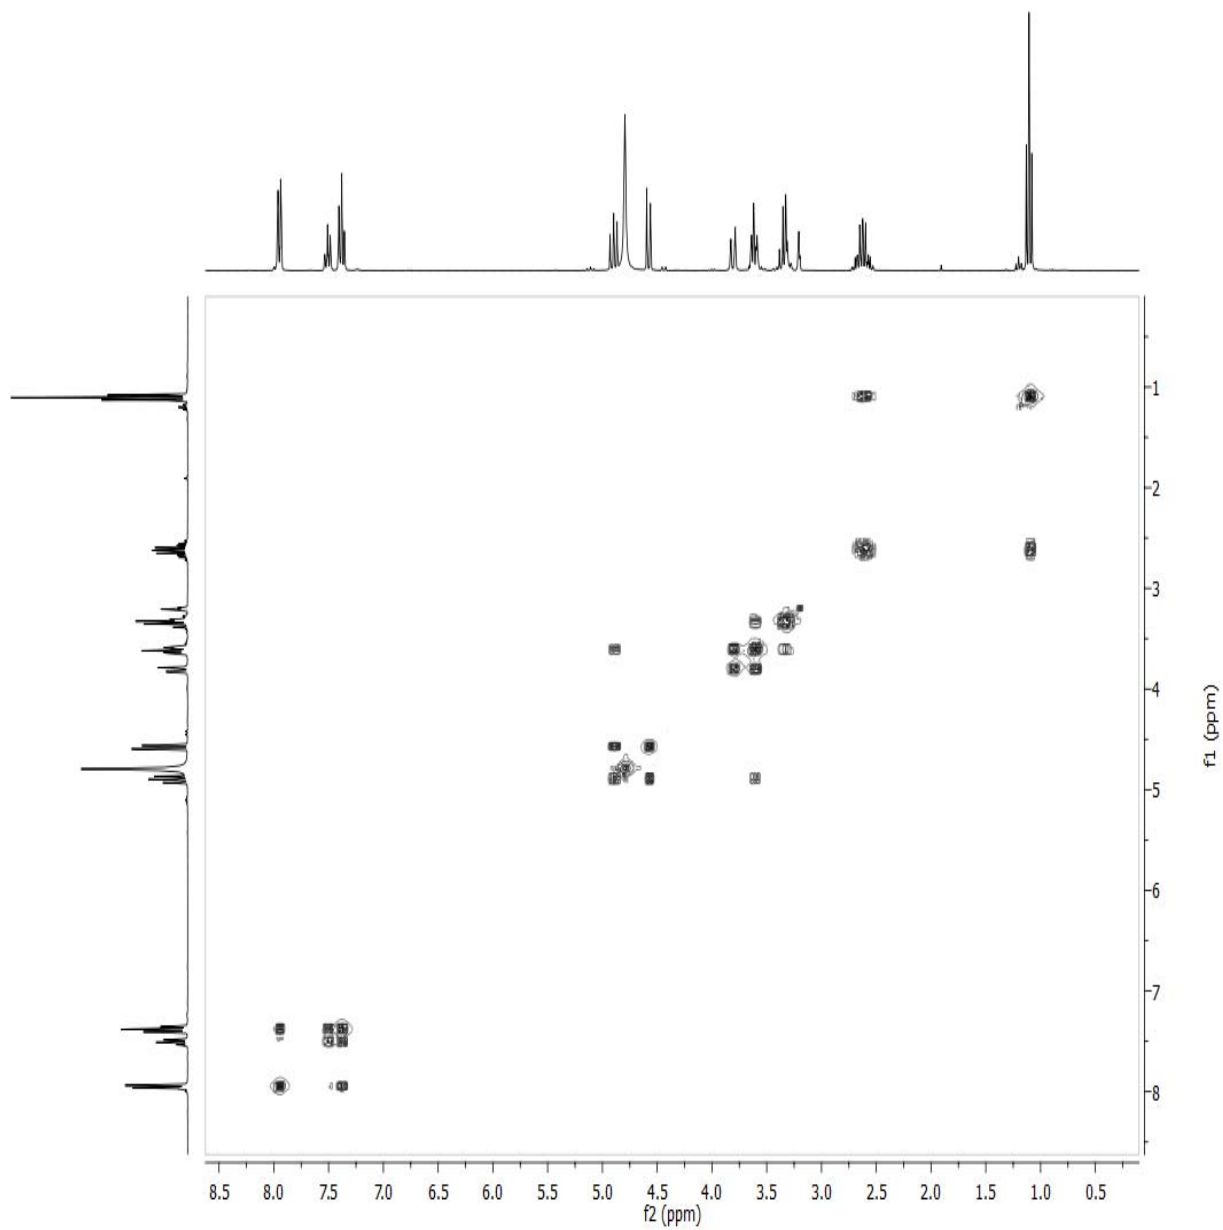

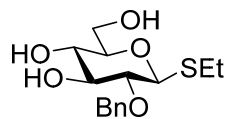

S6

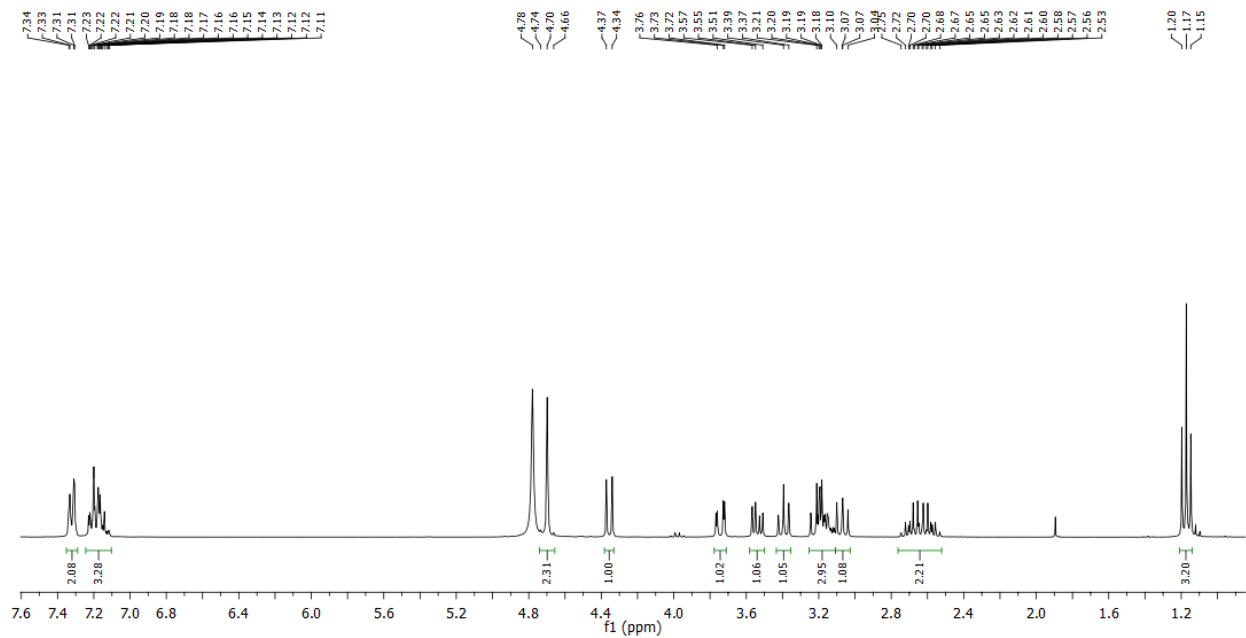

CD<sub>3</sub>OD 300 MHz

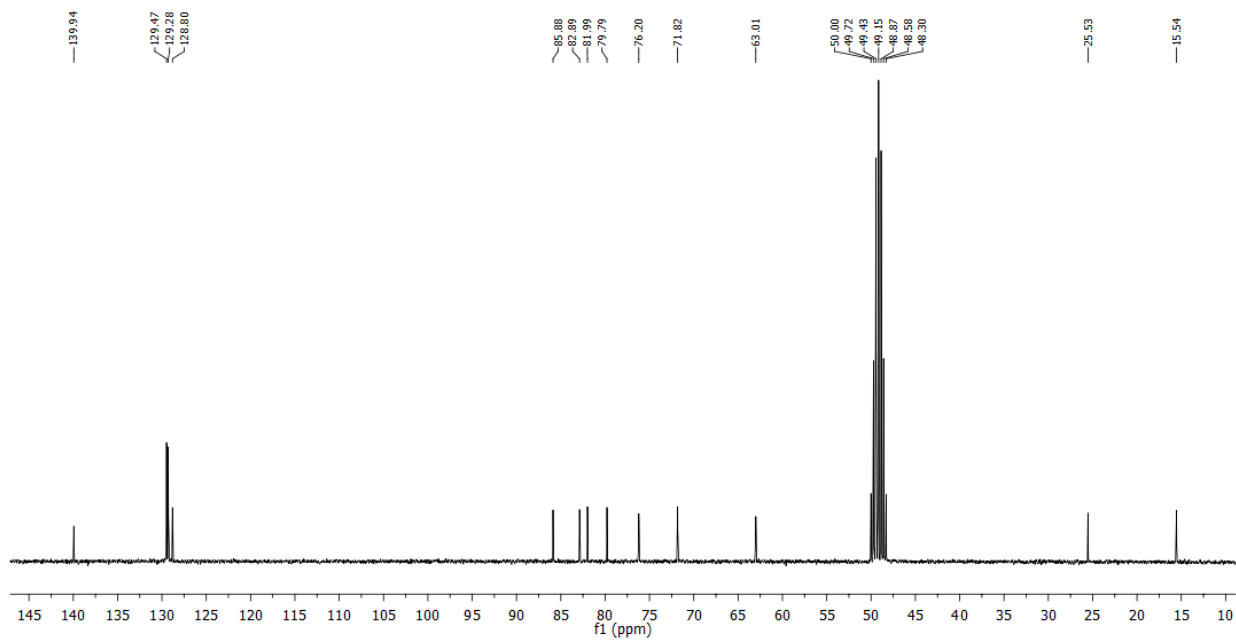

CD<sub>3</sub>OD 75 MHz

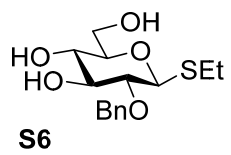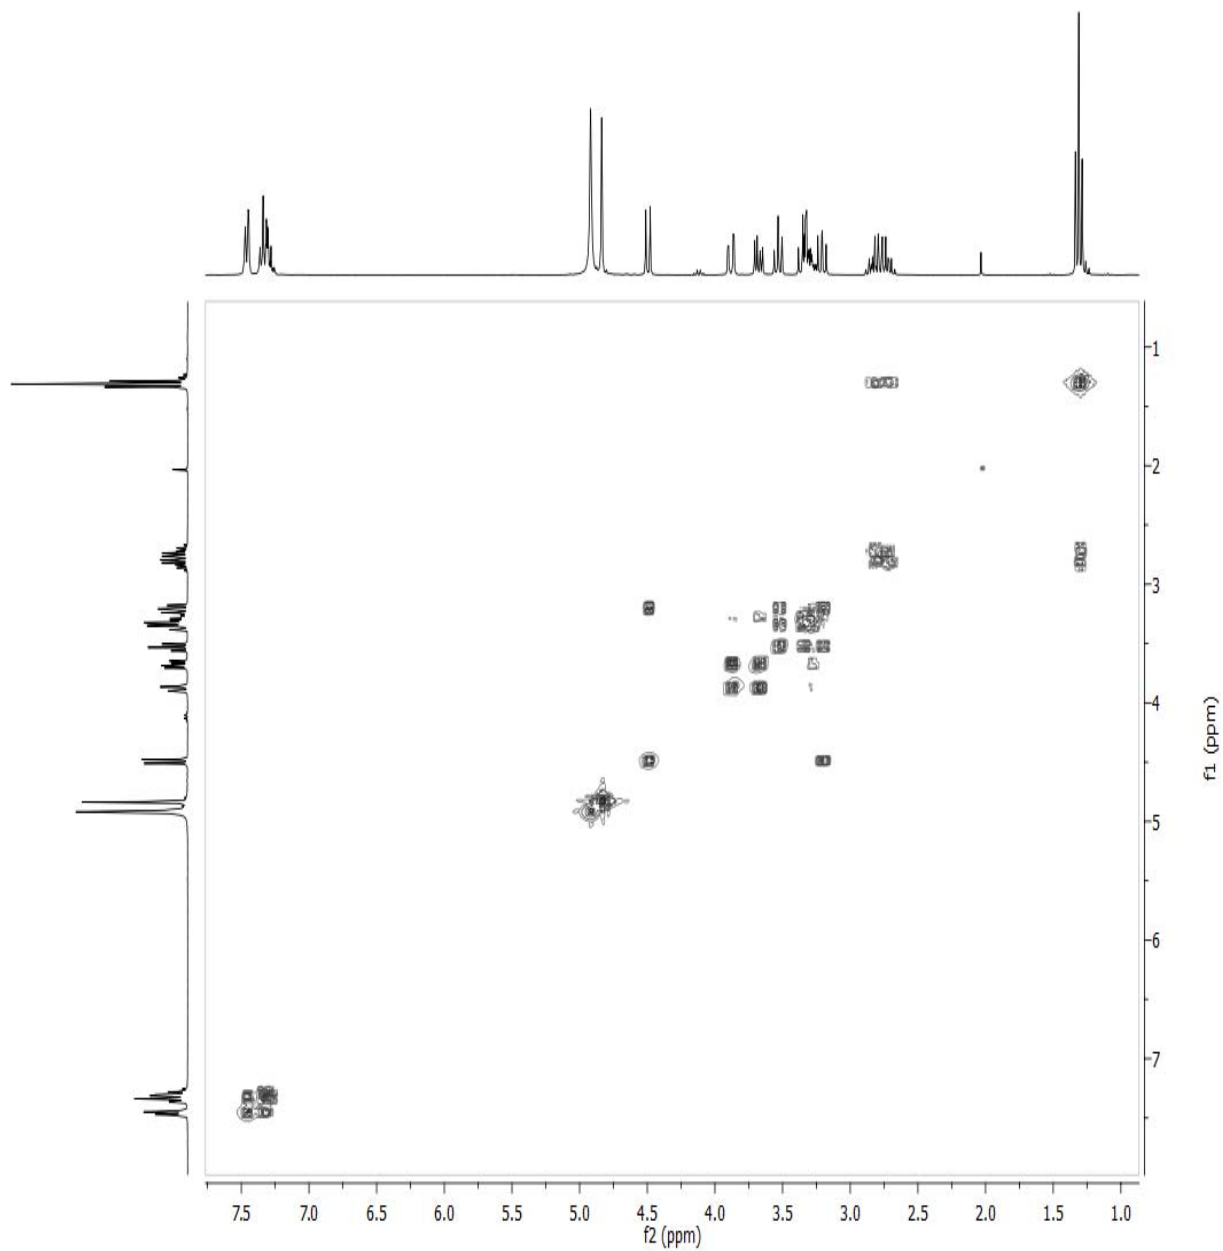

CD<sub>3</sub>OD 300 MHz



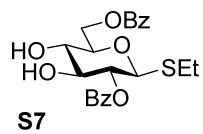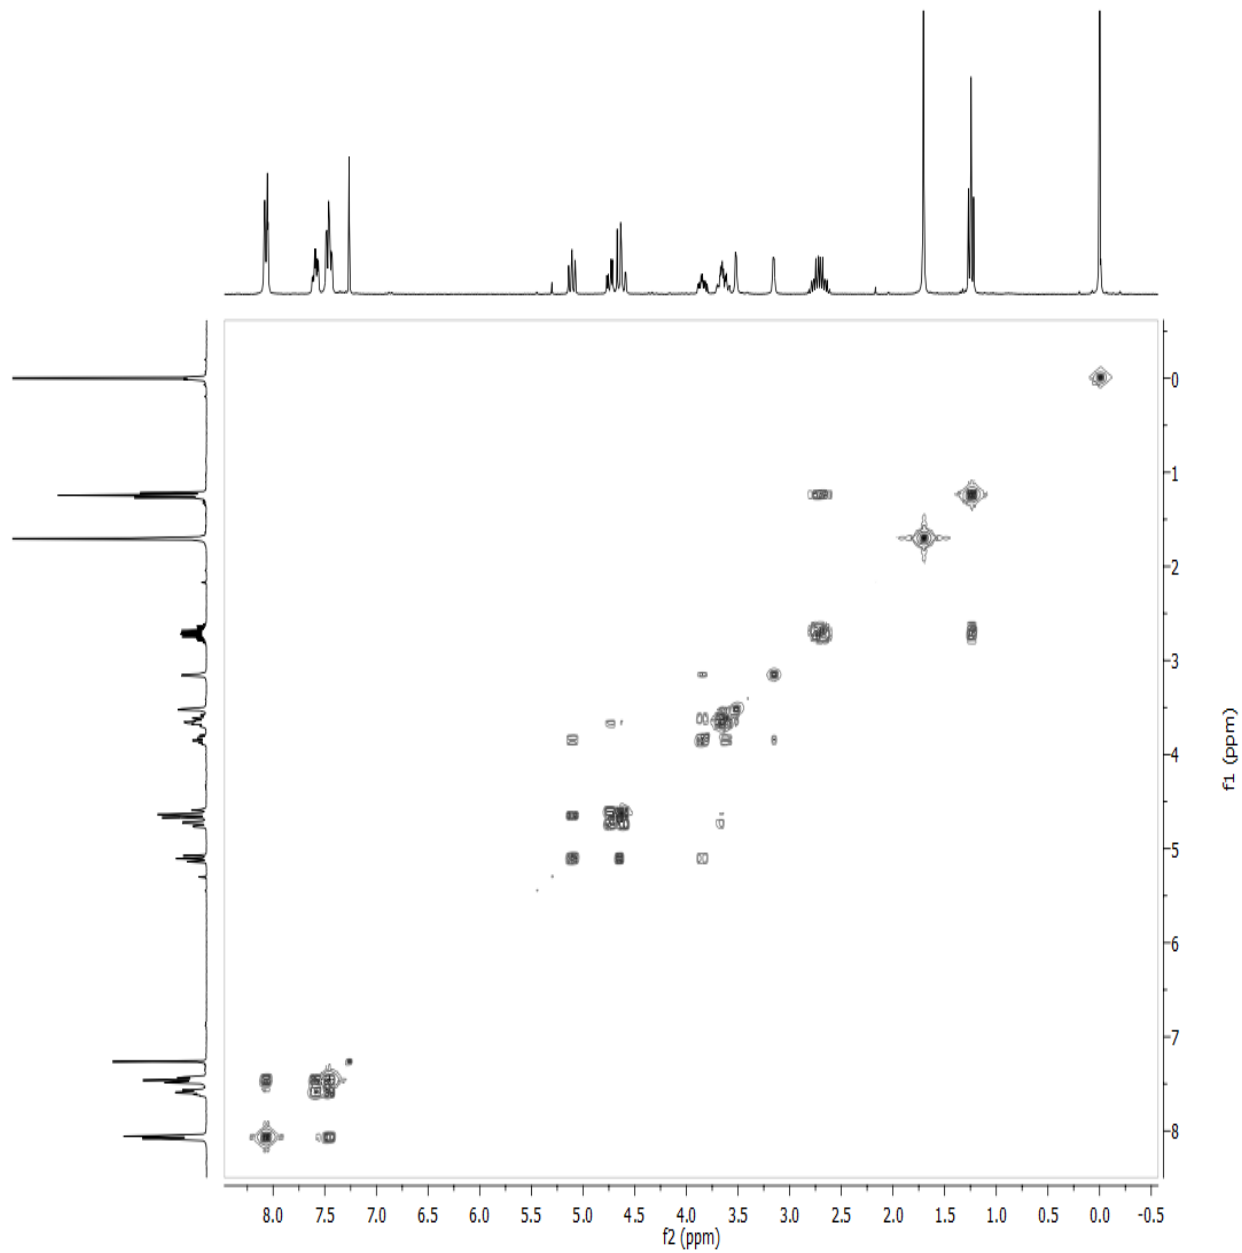

CDCl<sub>3</sub> 300 MHz

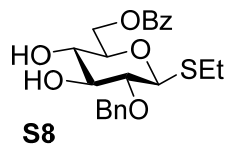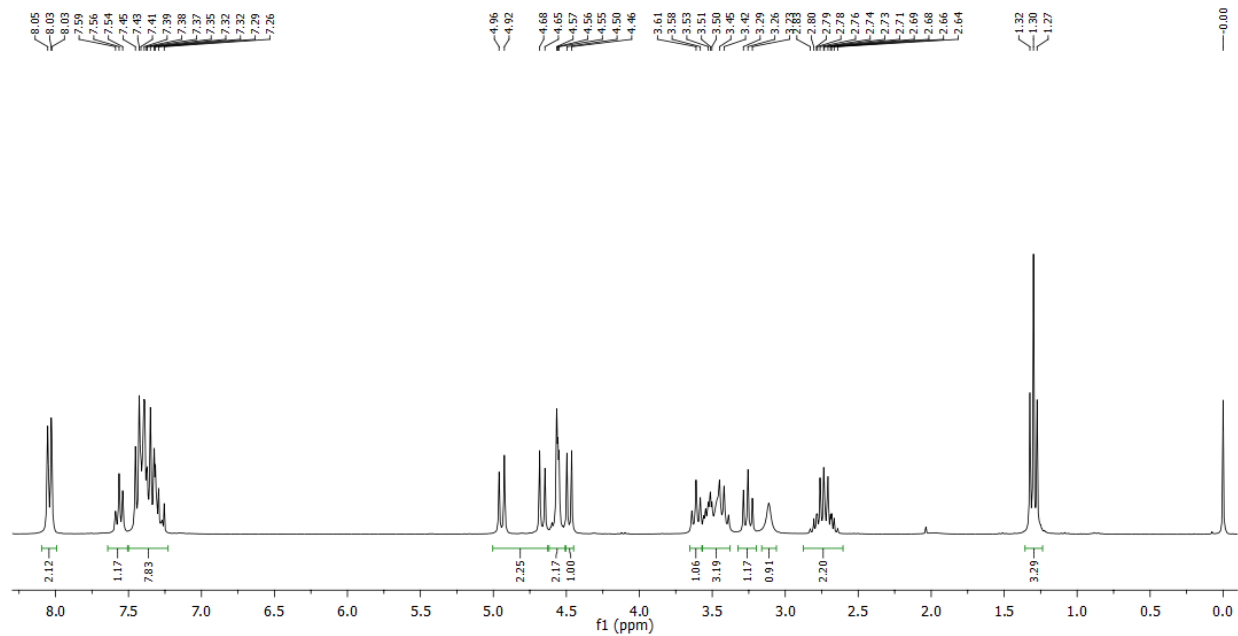

CDCl<sub>3</sub> 300 MHz

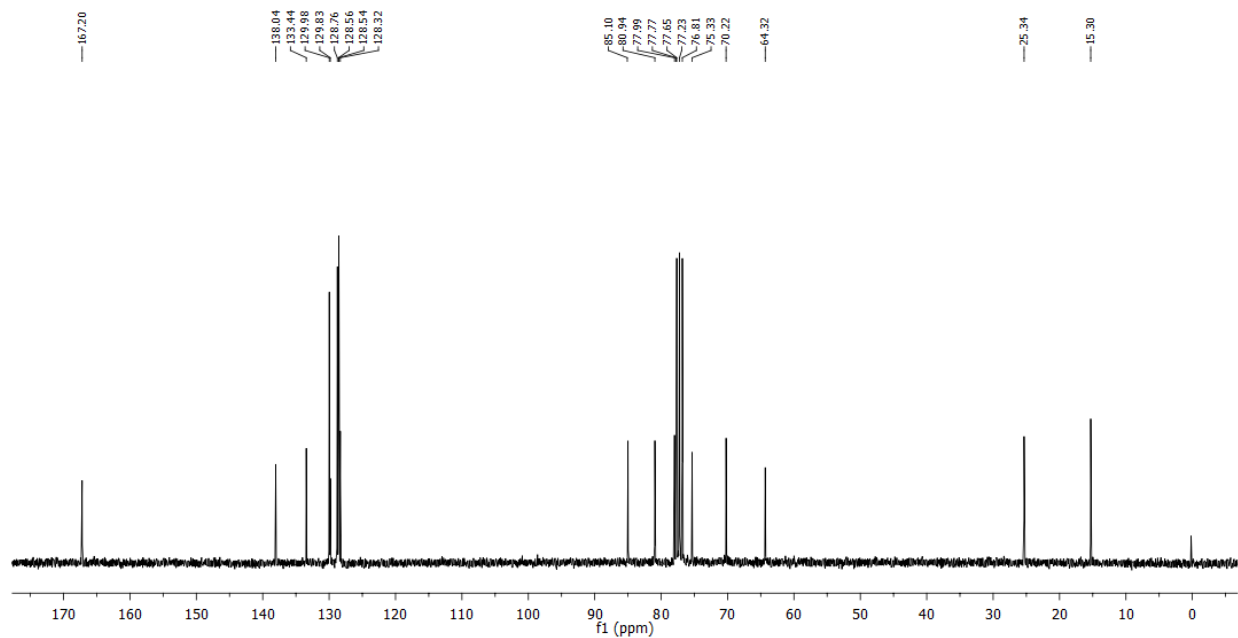

CDCl<sub>3</sub> 75 MHz

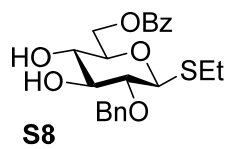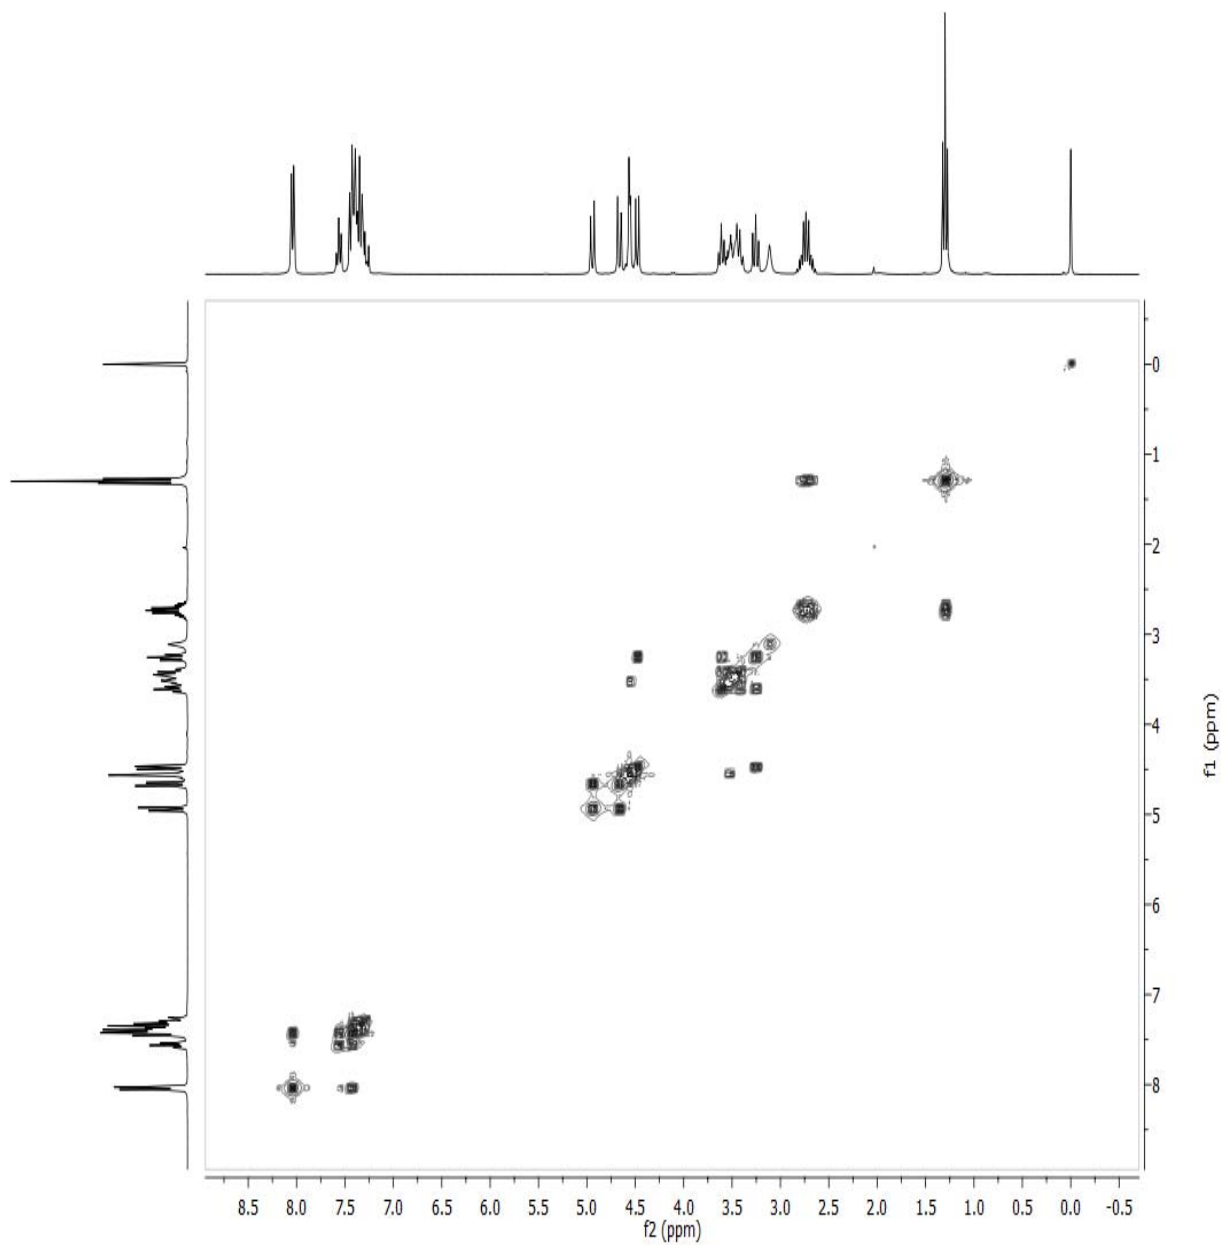

CDCl<sub>3</sub> 300 MHz



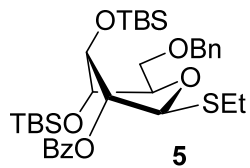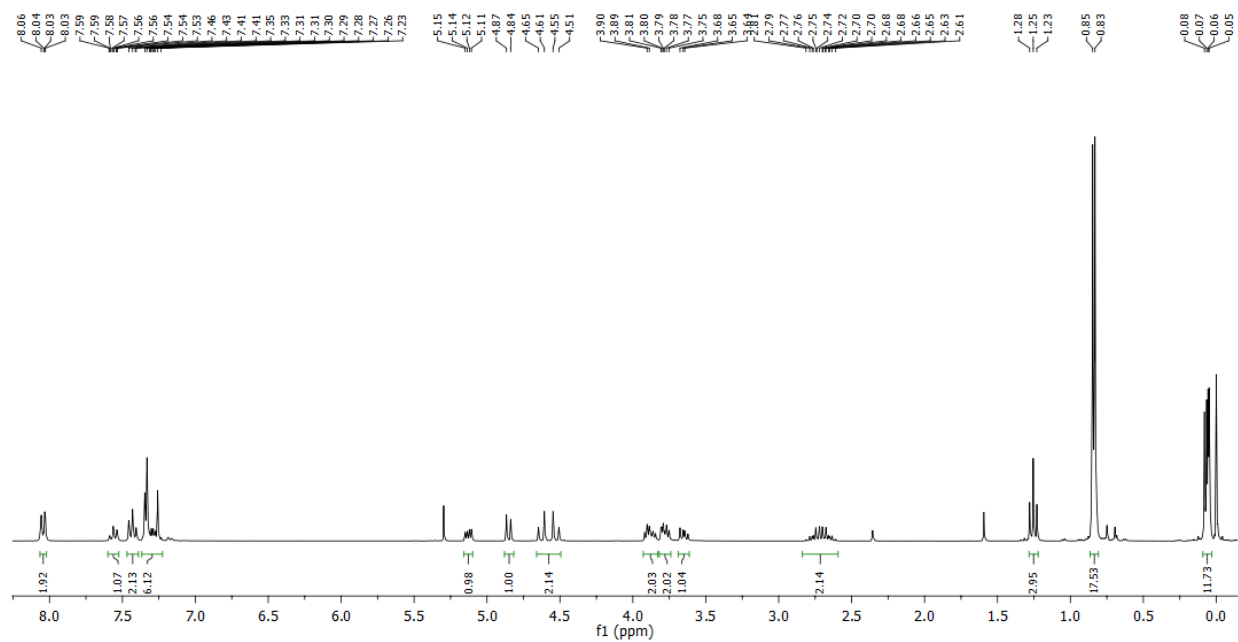

CDCl<sub>3</sub> 300 MHz

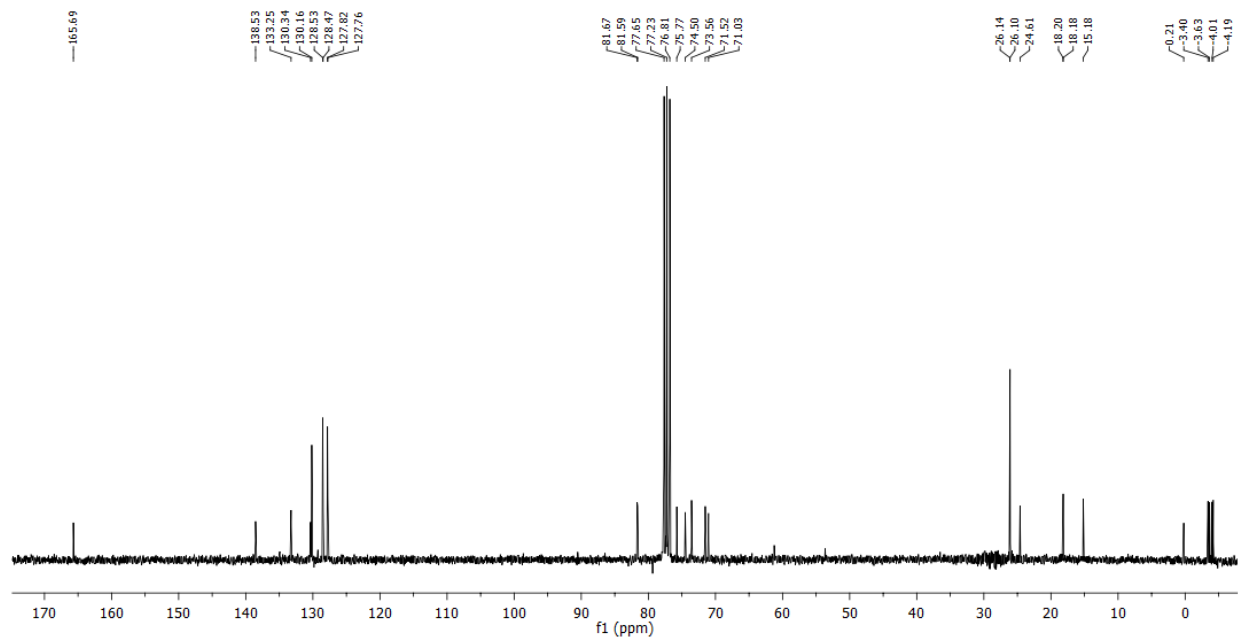

CDCl<sub>3</sub> 75 MHz

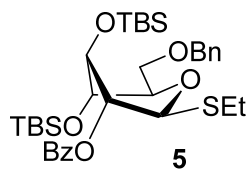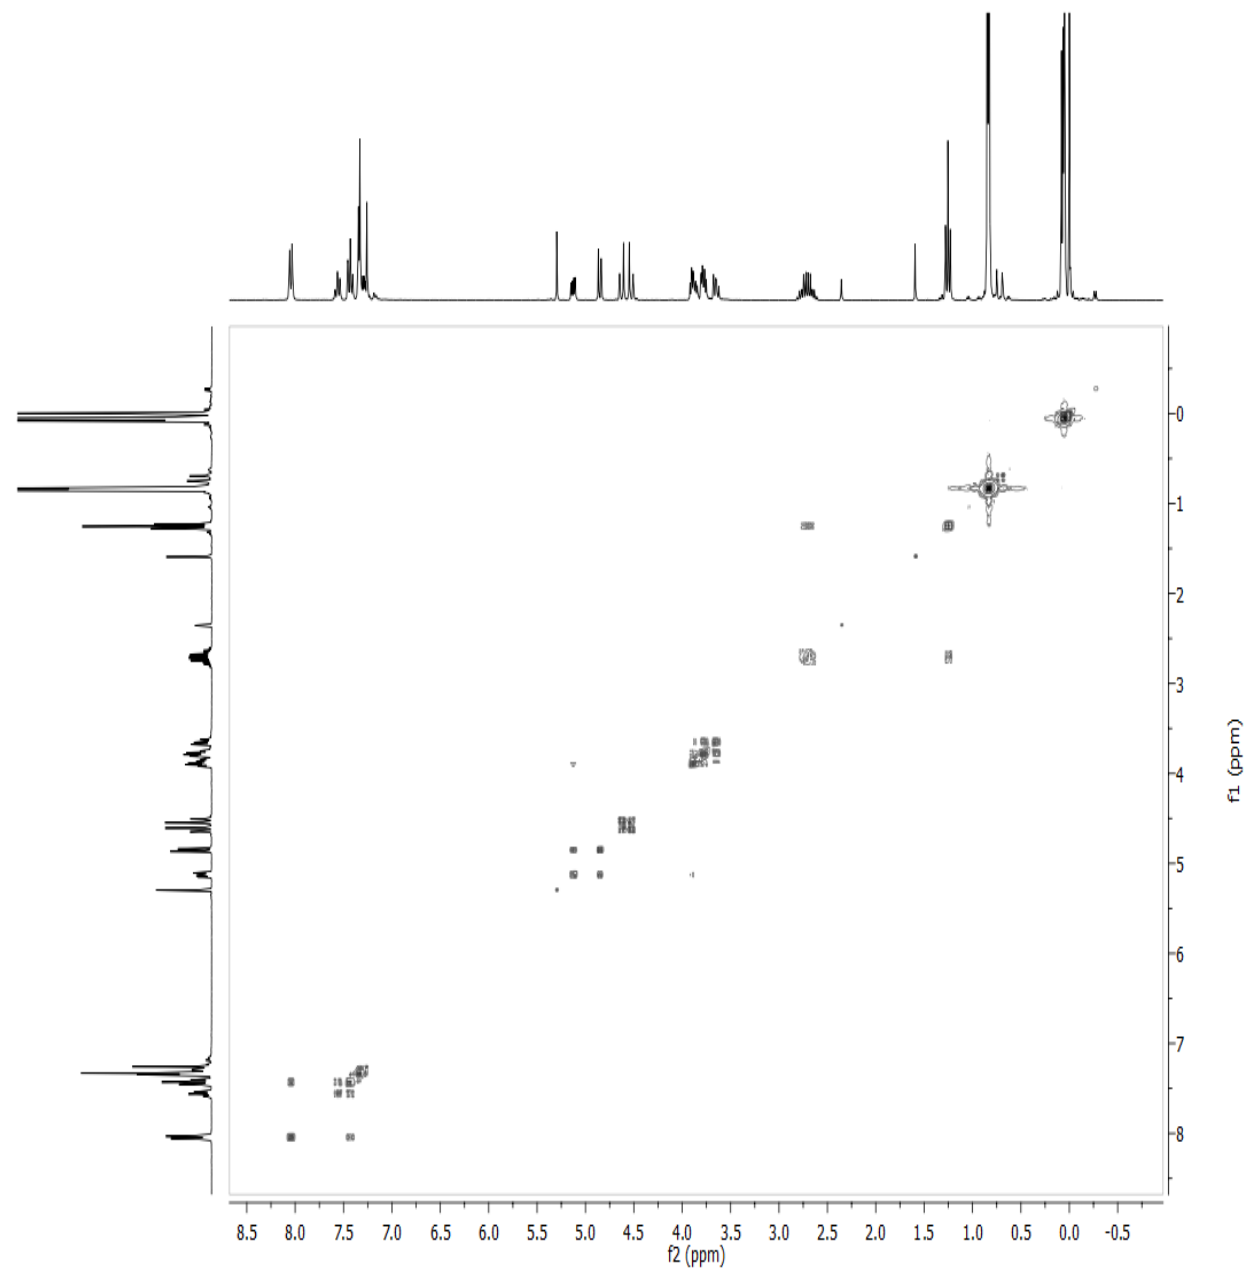

CDCl<sub>3</sub> 300 MHz

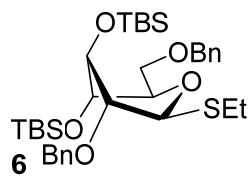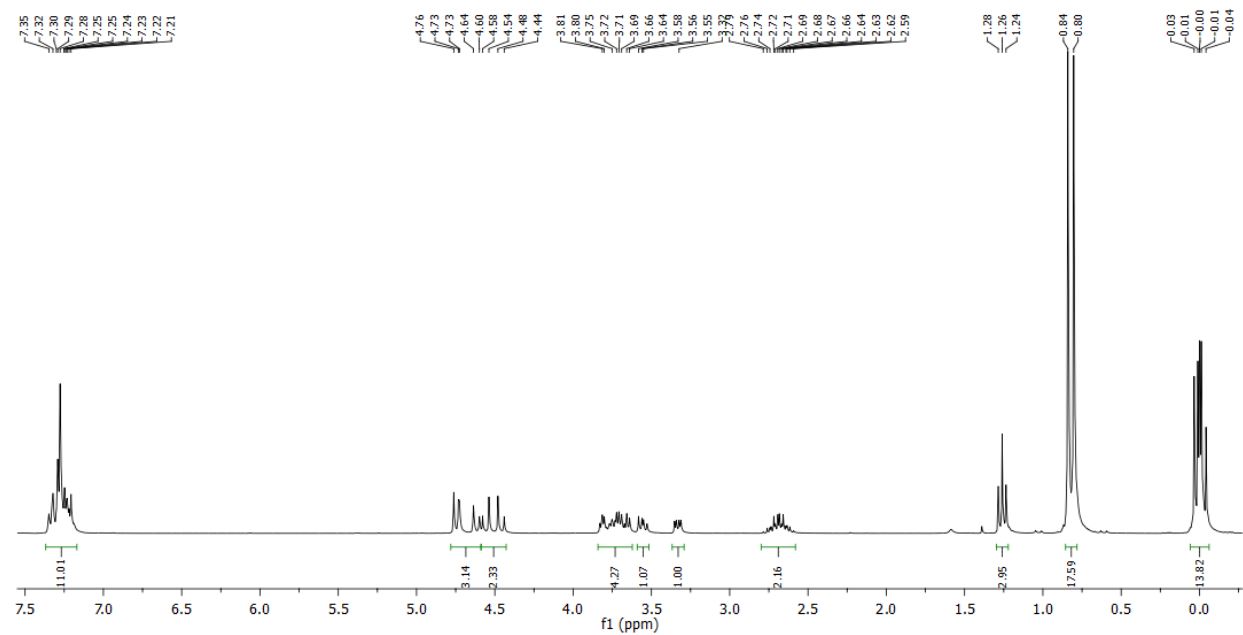

CDCl<sub>3</sub> 300 MHz

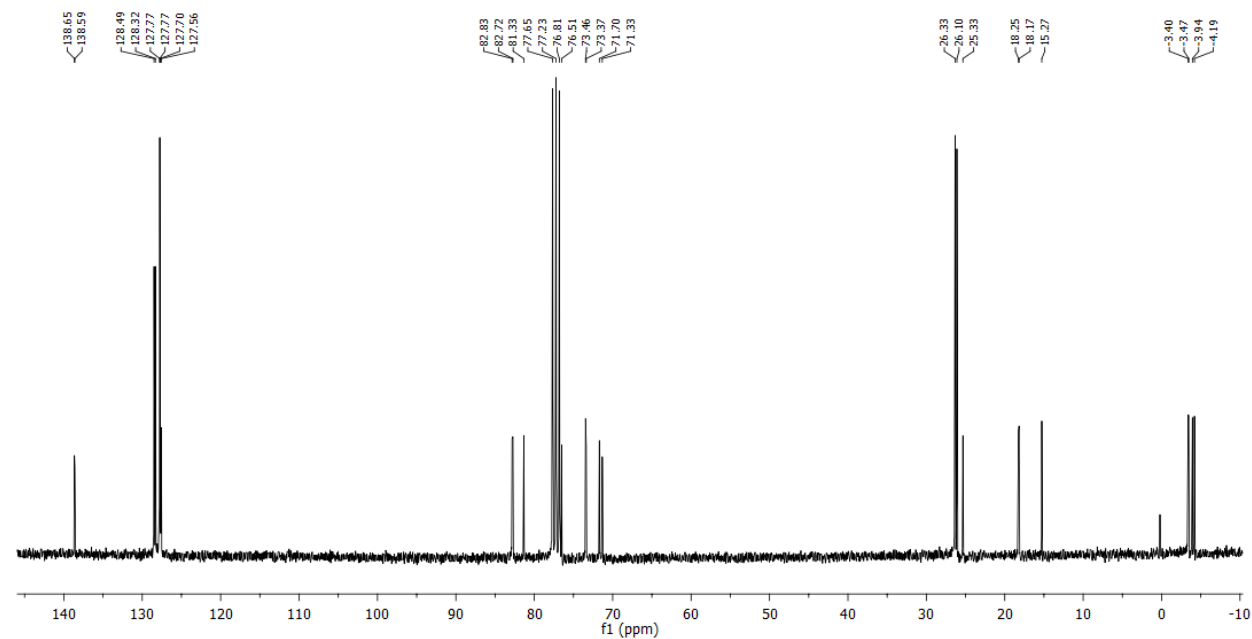

CDCl<sub>3</sub> 75 MHz

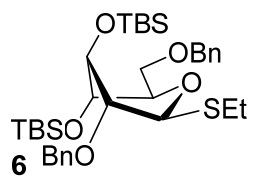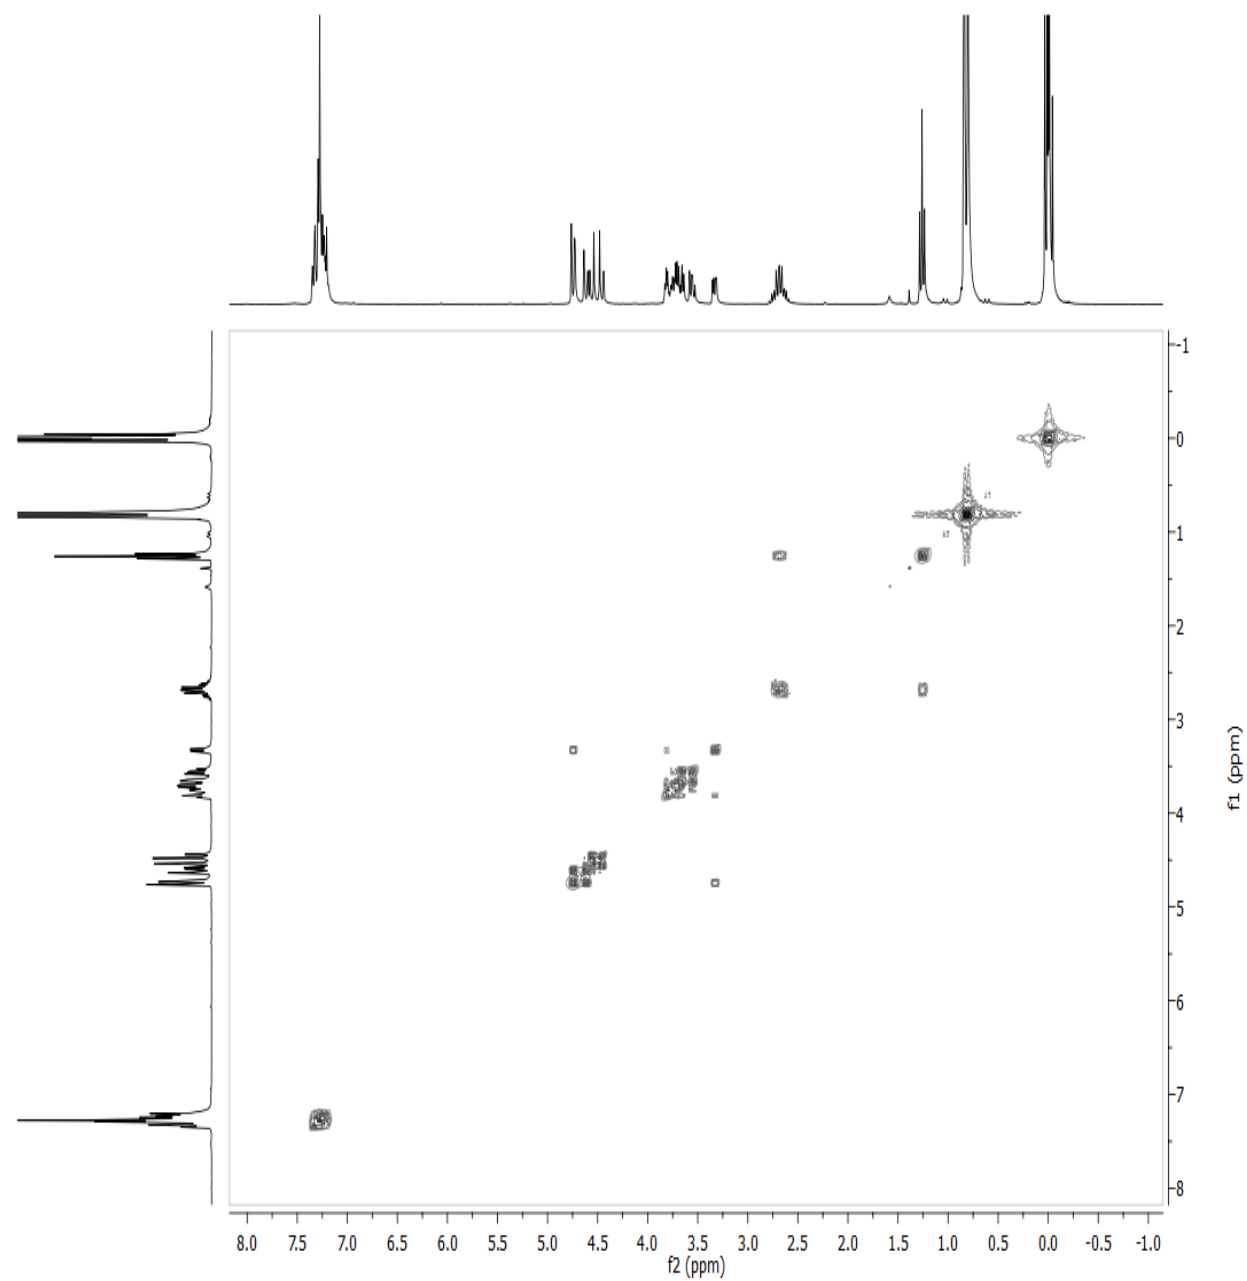

CDCl<sub>3</sub> 300 MHz

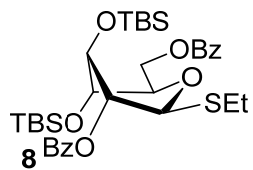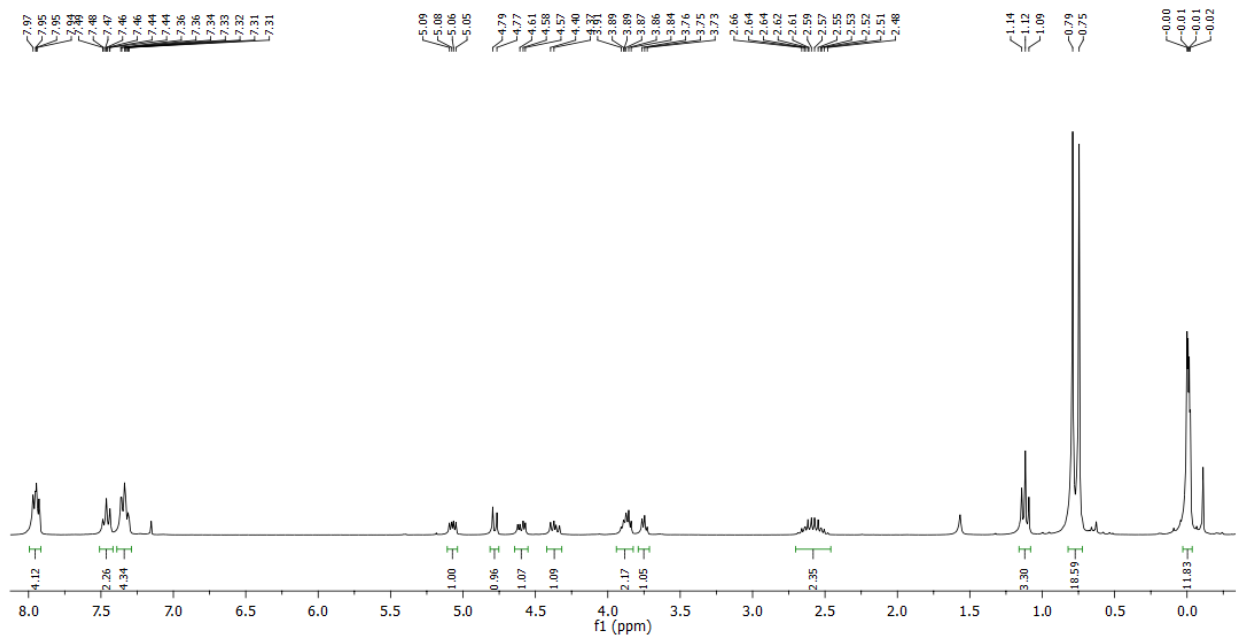

CDCl<sub>3</sub> 300 MHz

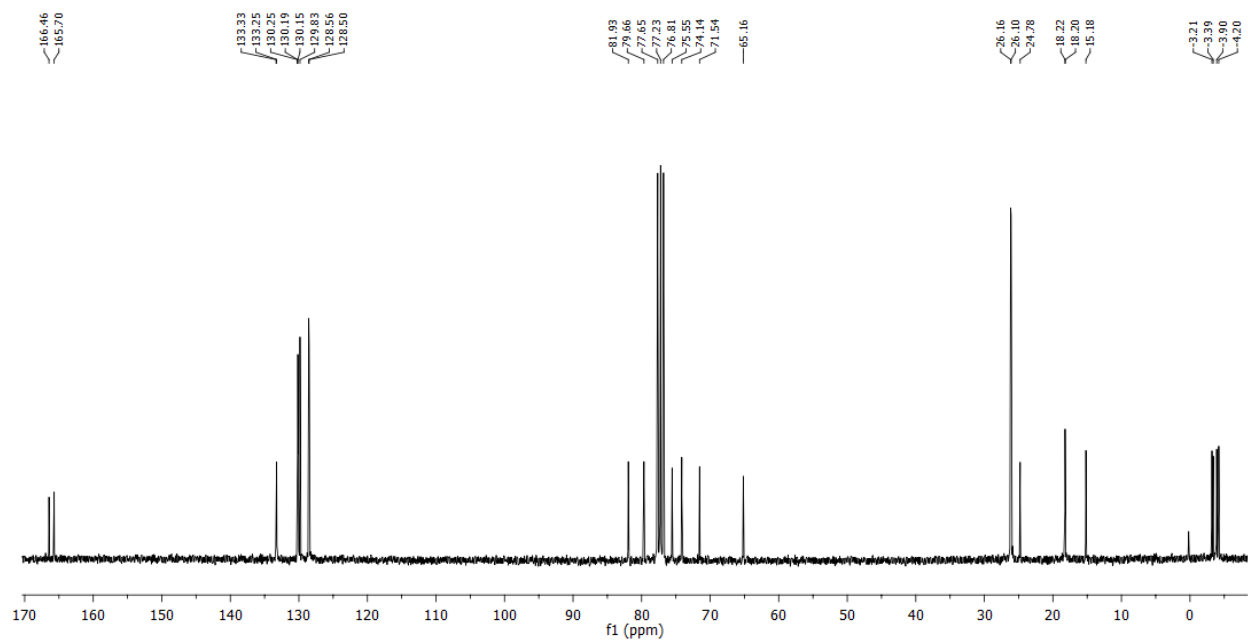

CDCl<sub>3</sub> 75 MHz

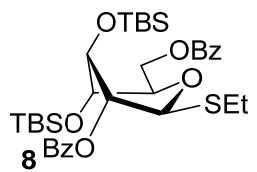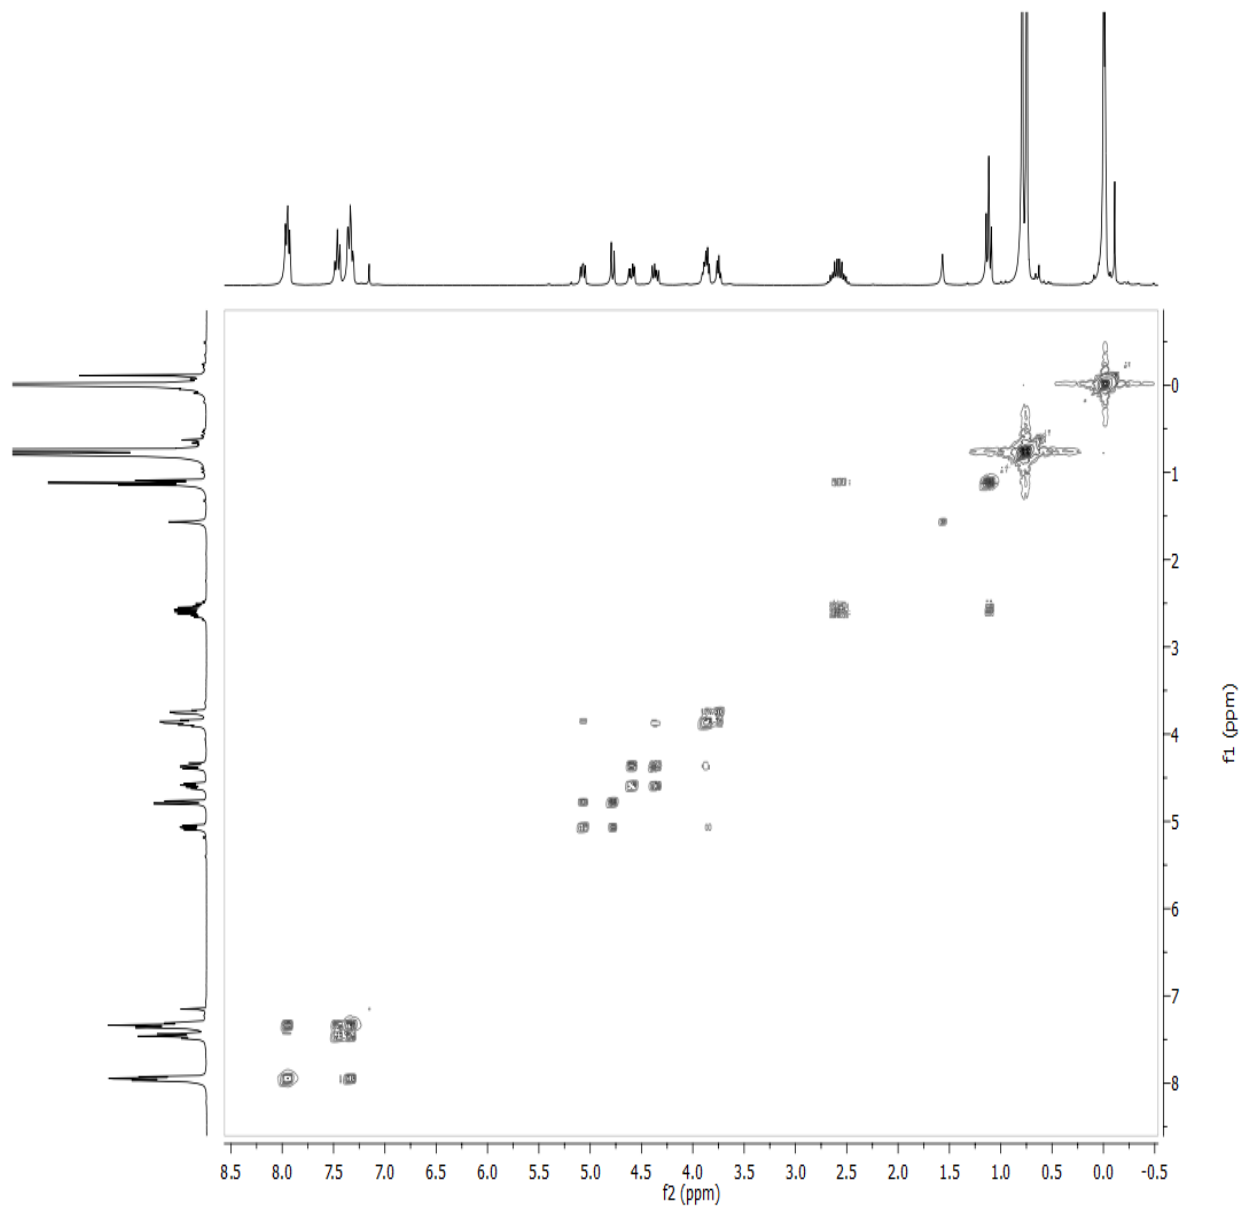

CDCl<sub>3</sub> 300 MHz

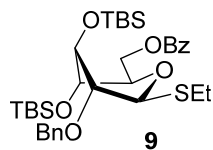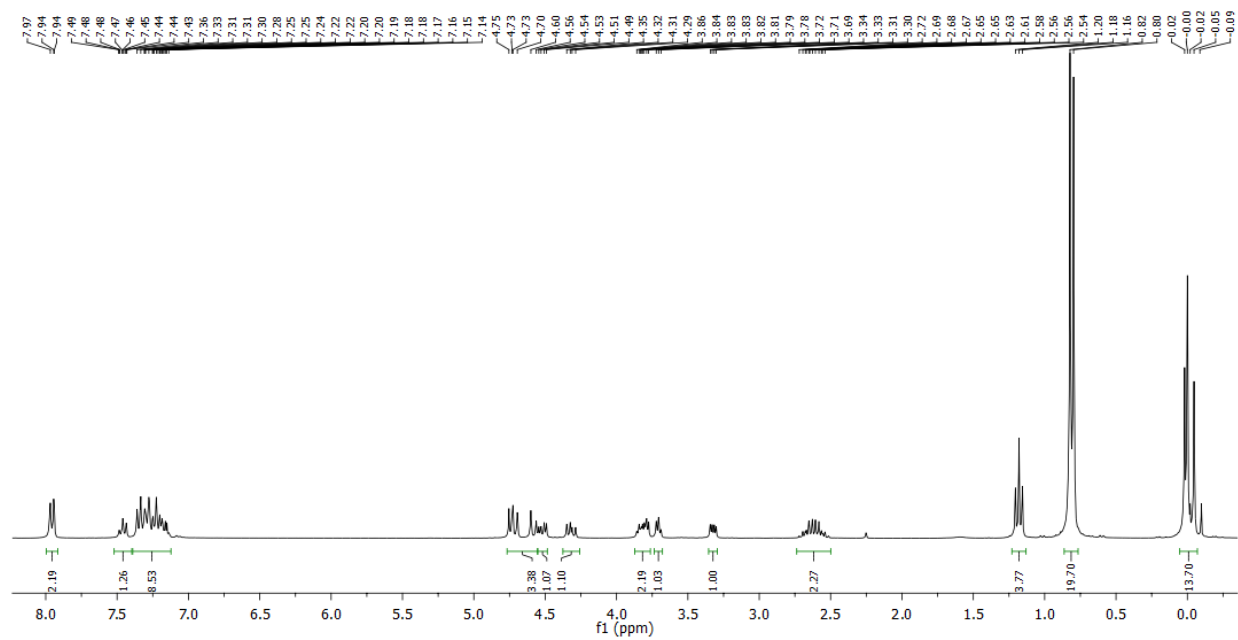

CDCl<sub>3</sub> 300 MHz

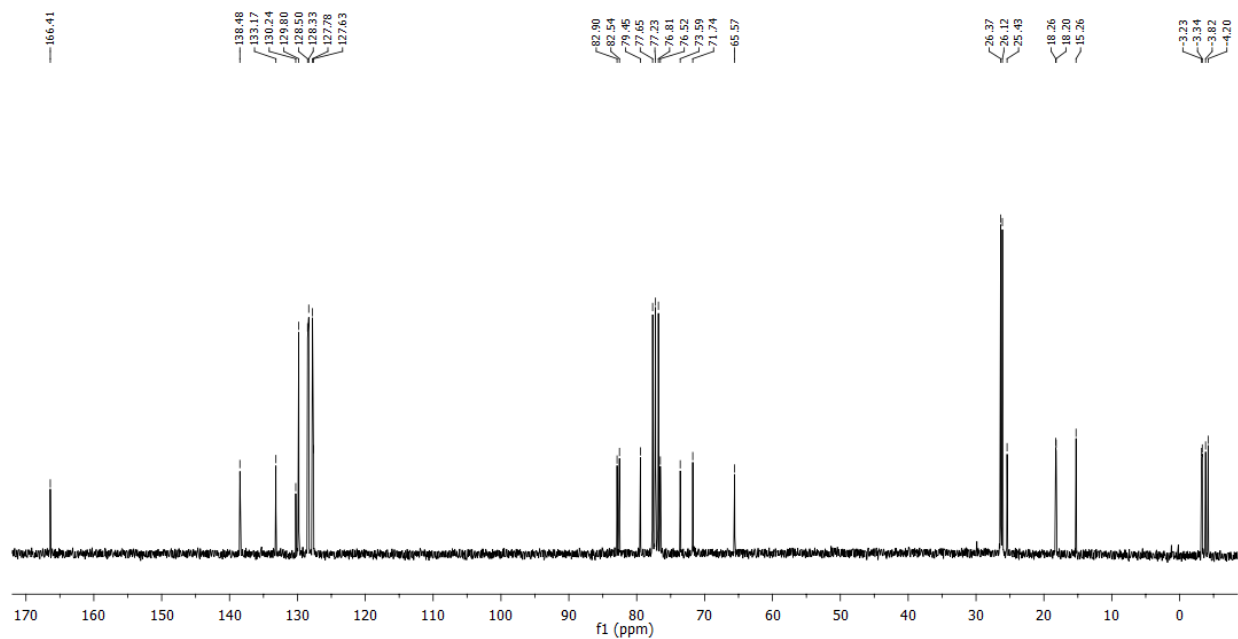

CDCl<sub>3</sub> 75 MHz





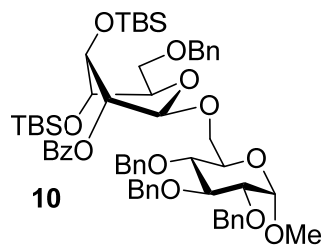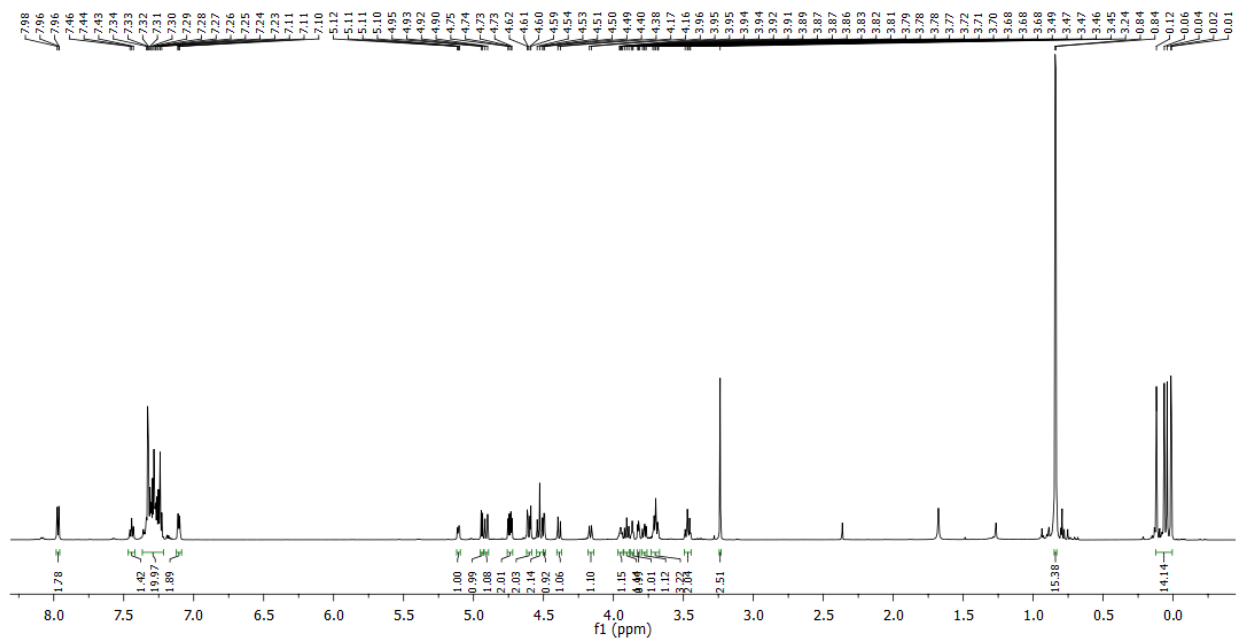

CDCl<sub>3</sub> 600 MHz

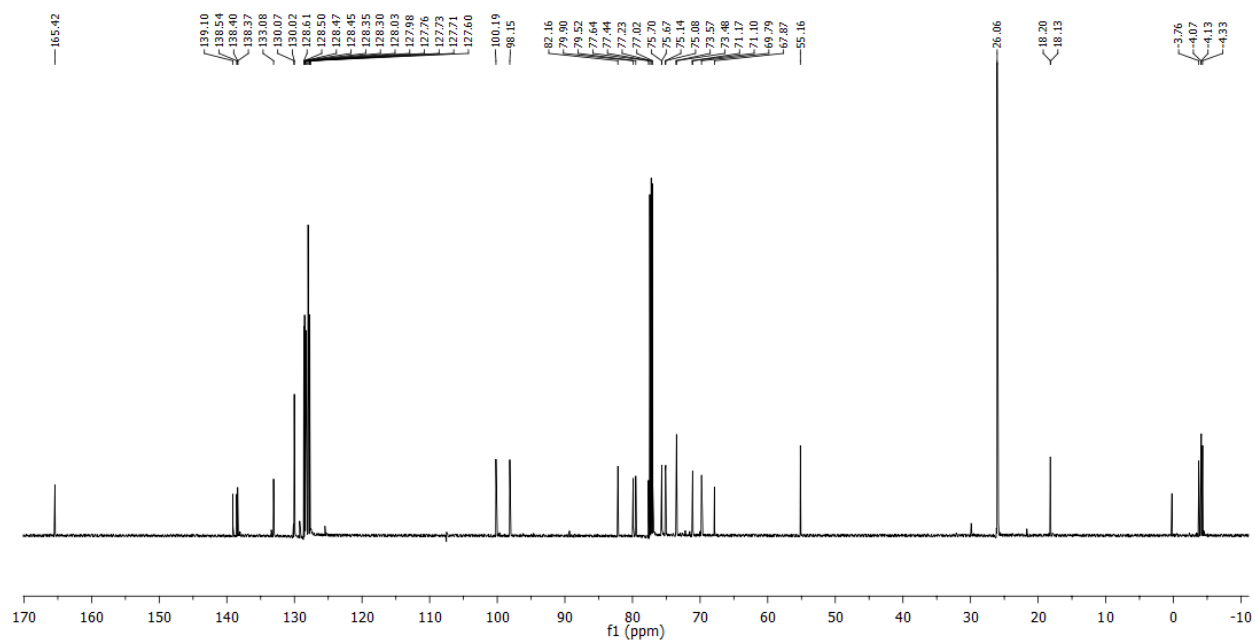

CDCl<sub>3</sub> 150 MHz







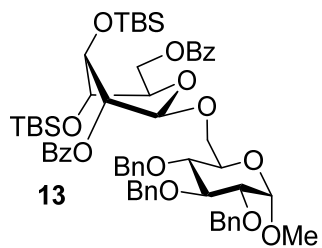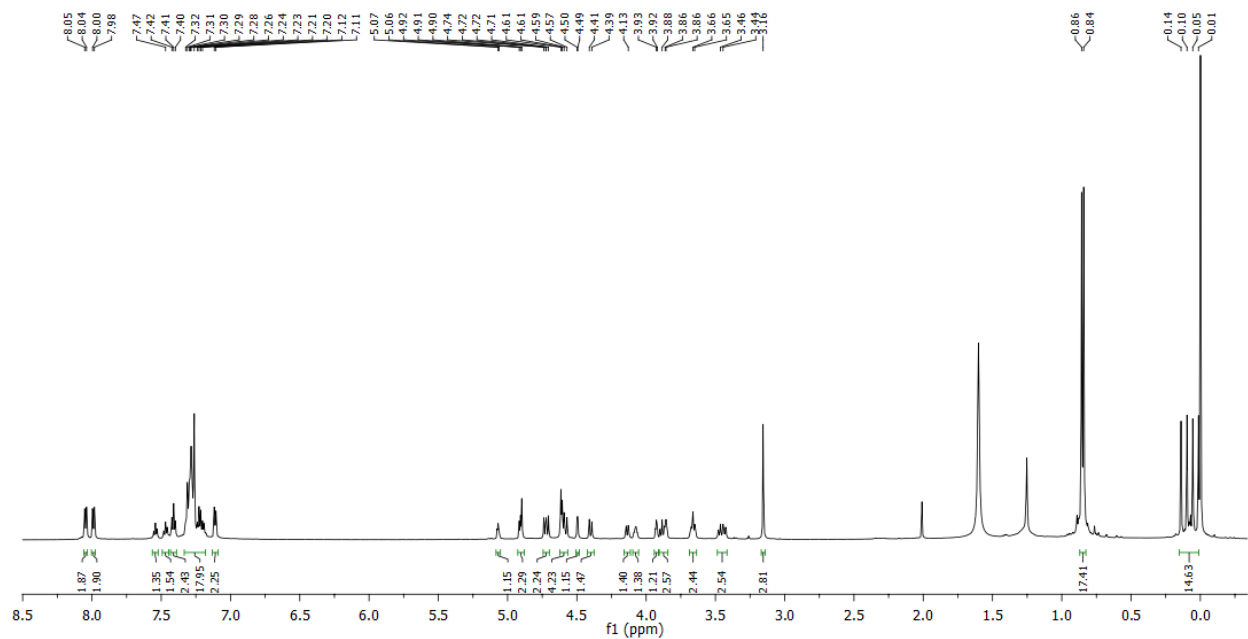

CDCl<sub>3</sub> 600 MHz

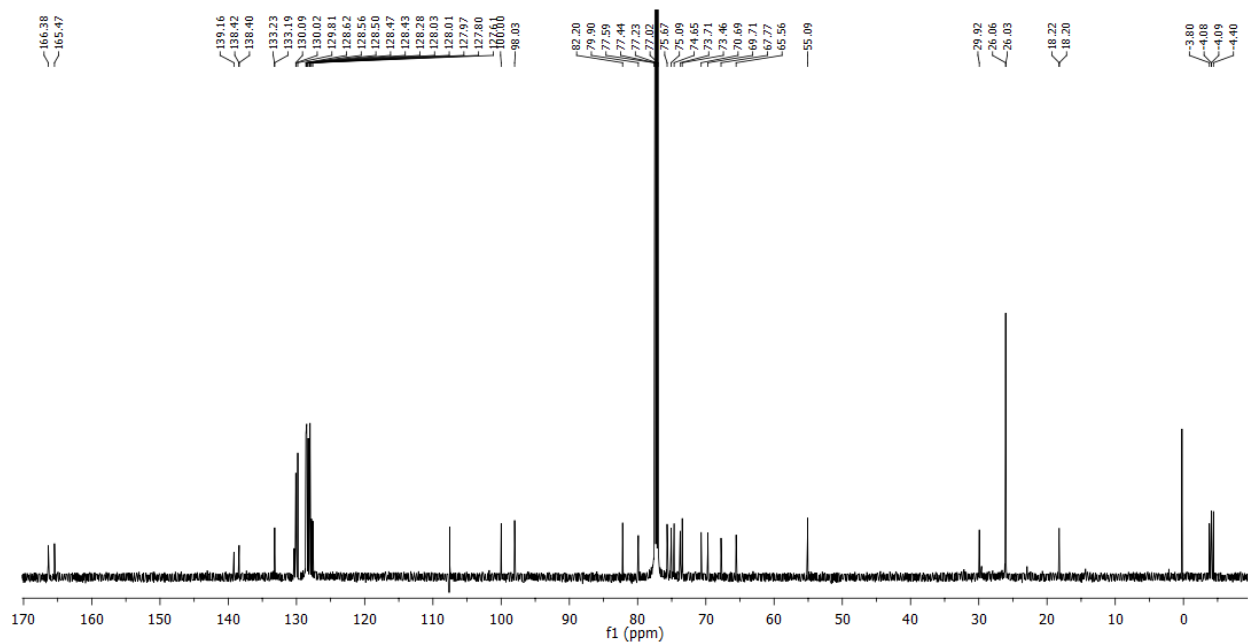

CDCl<sub>3</sub> 150 MHz

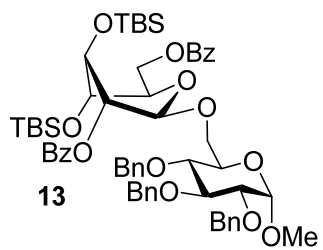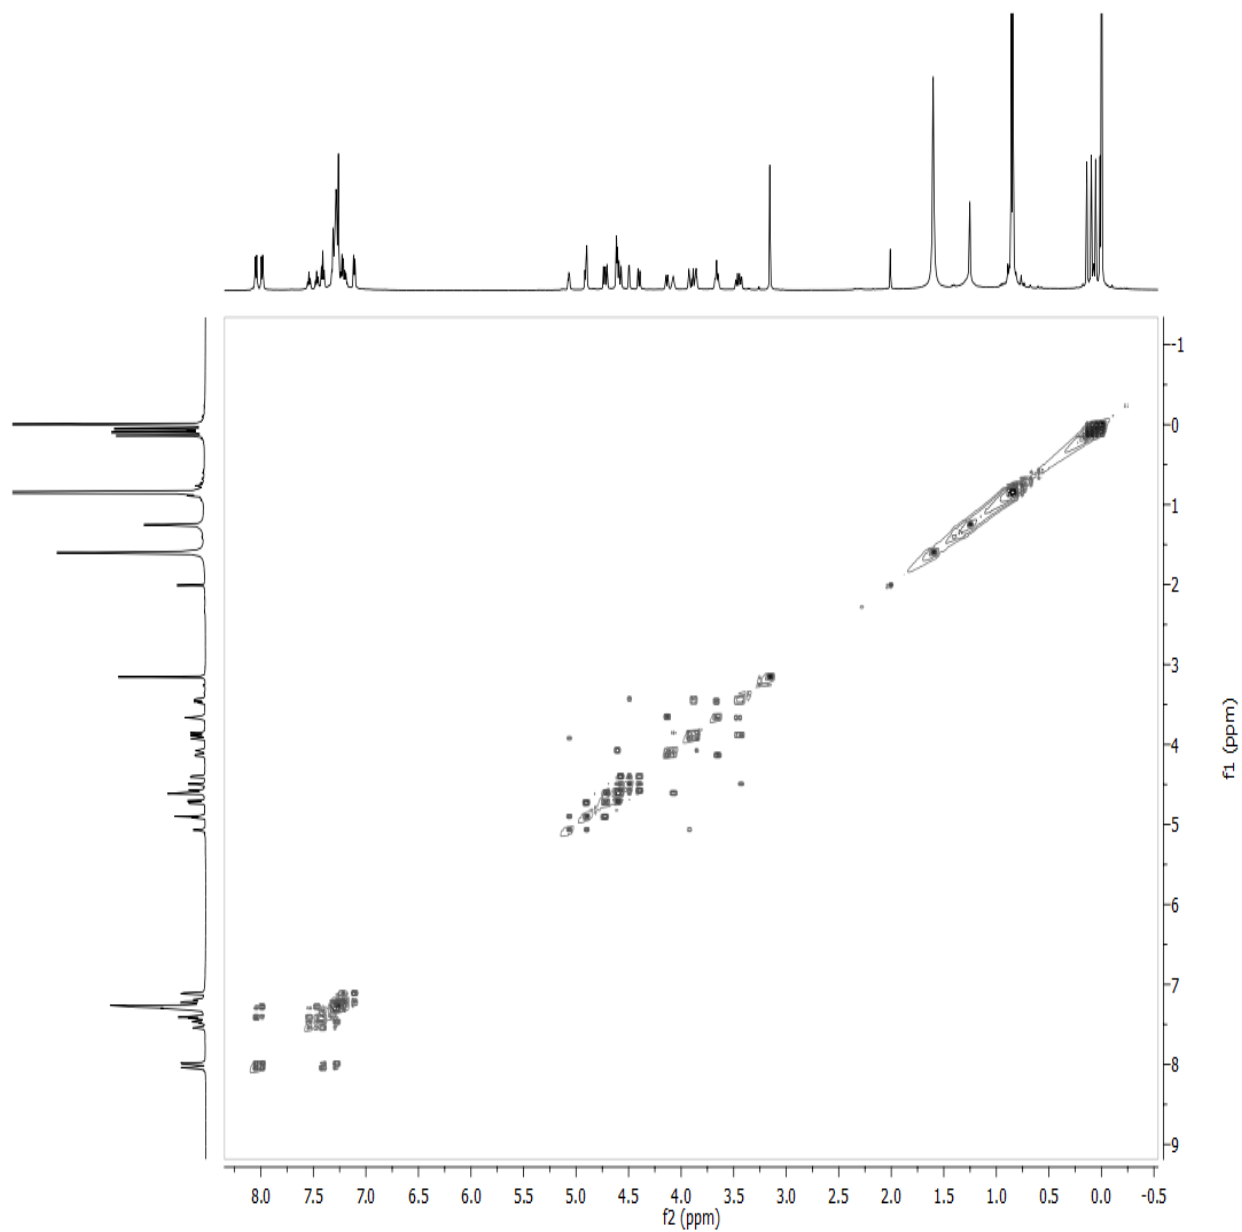

CDCl<sub>3</sub> 600 MHz

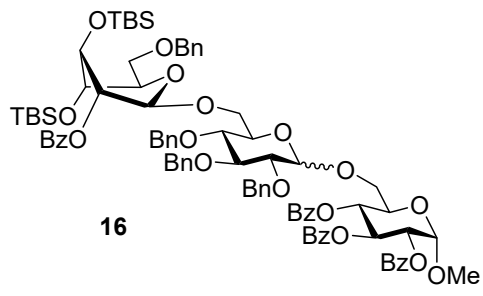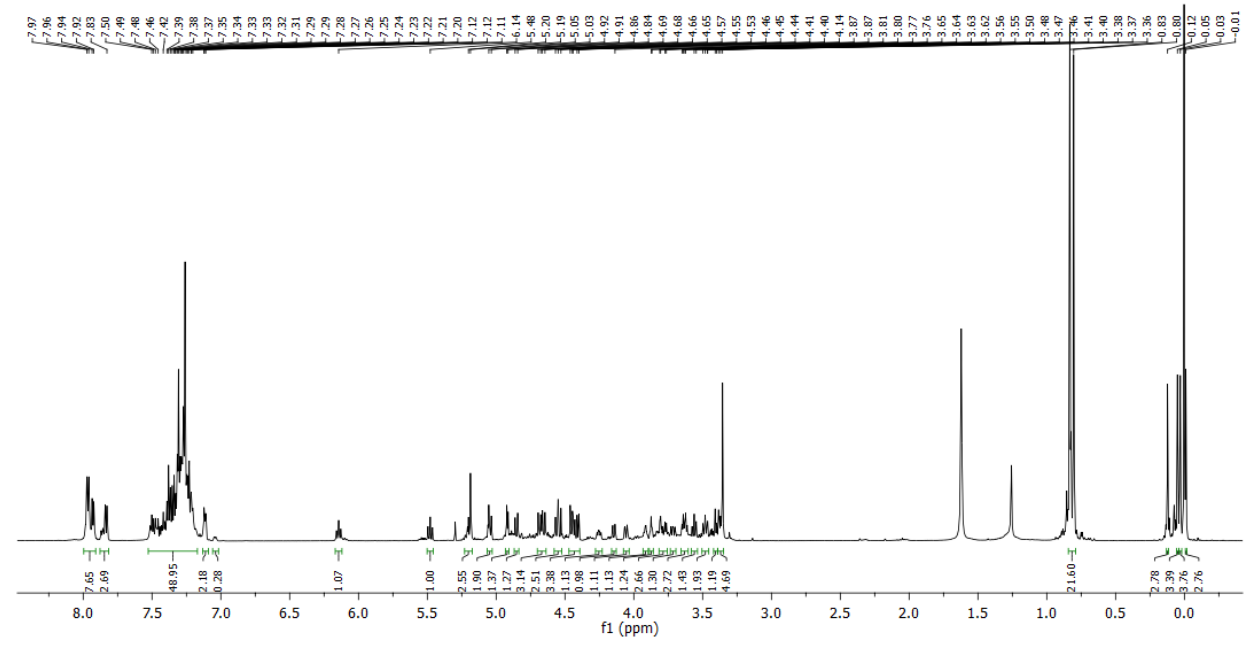

CDCl<sub>3</sub> 600 MHz

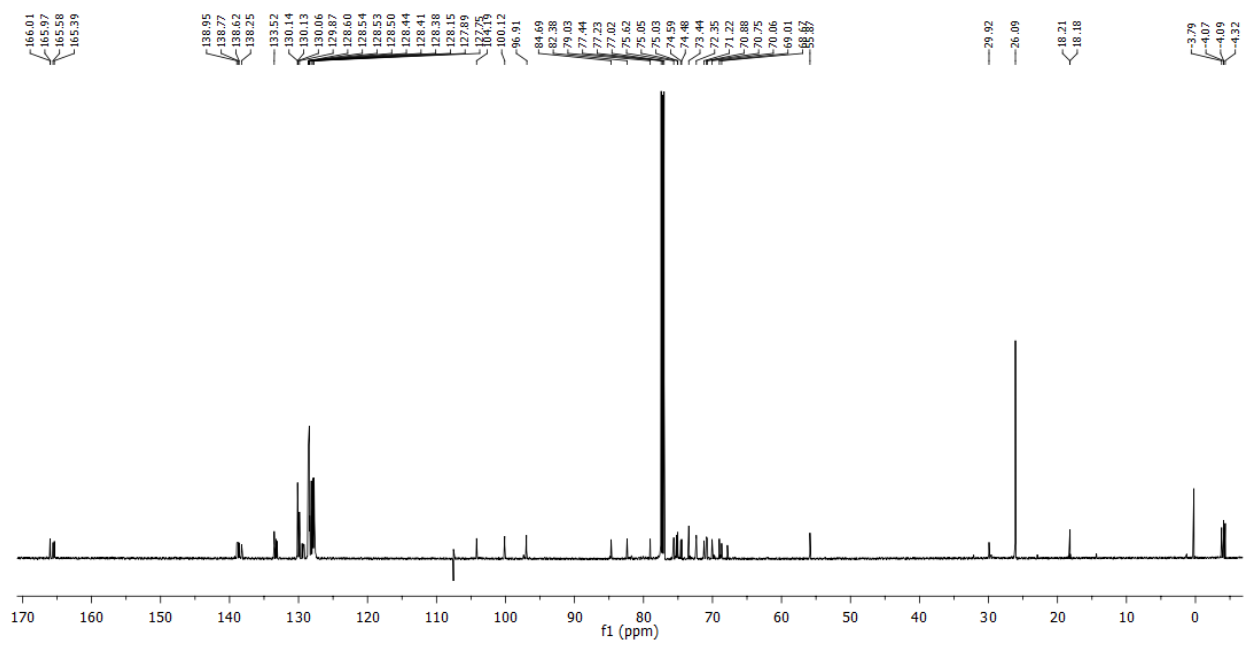

CDCl<sub>3</sub> 150MHz





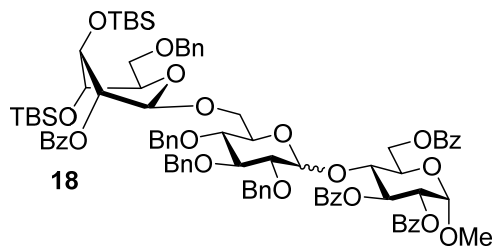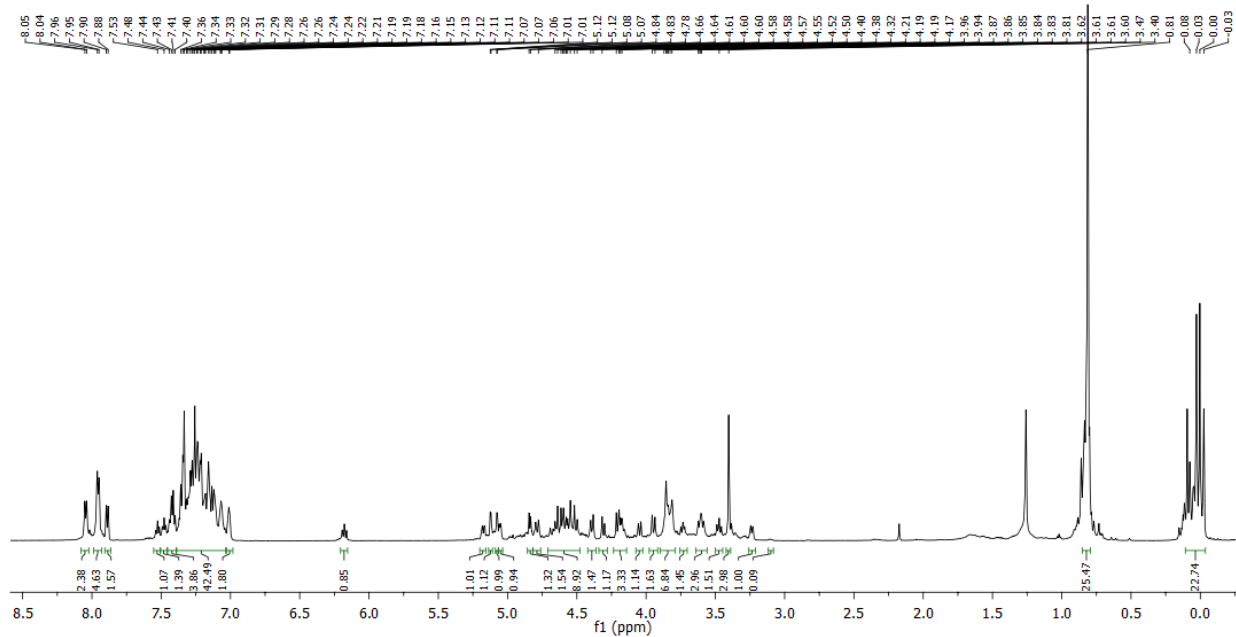

CDCl<sub>3</sub> 300 MHz

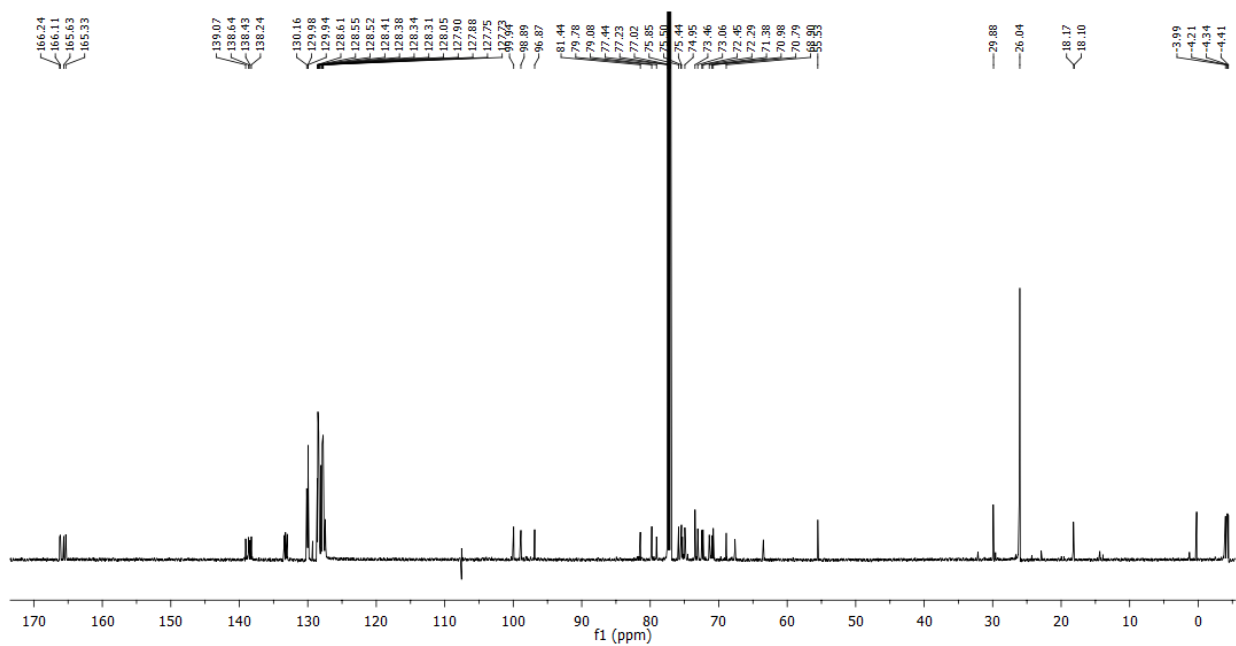

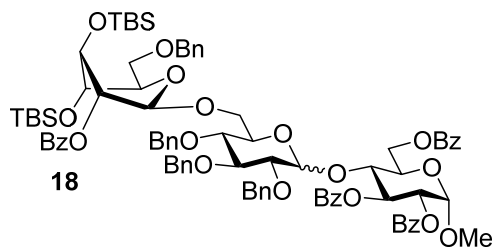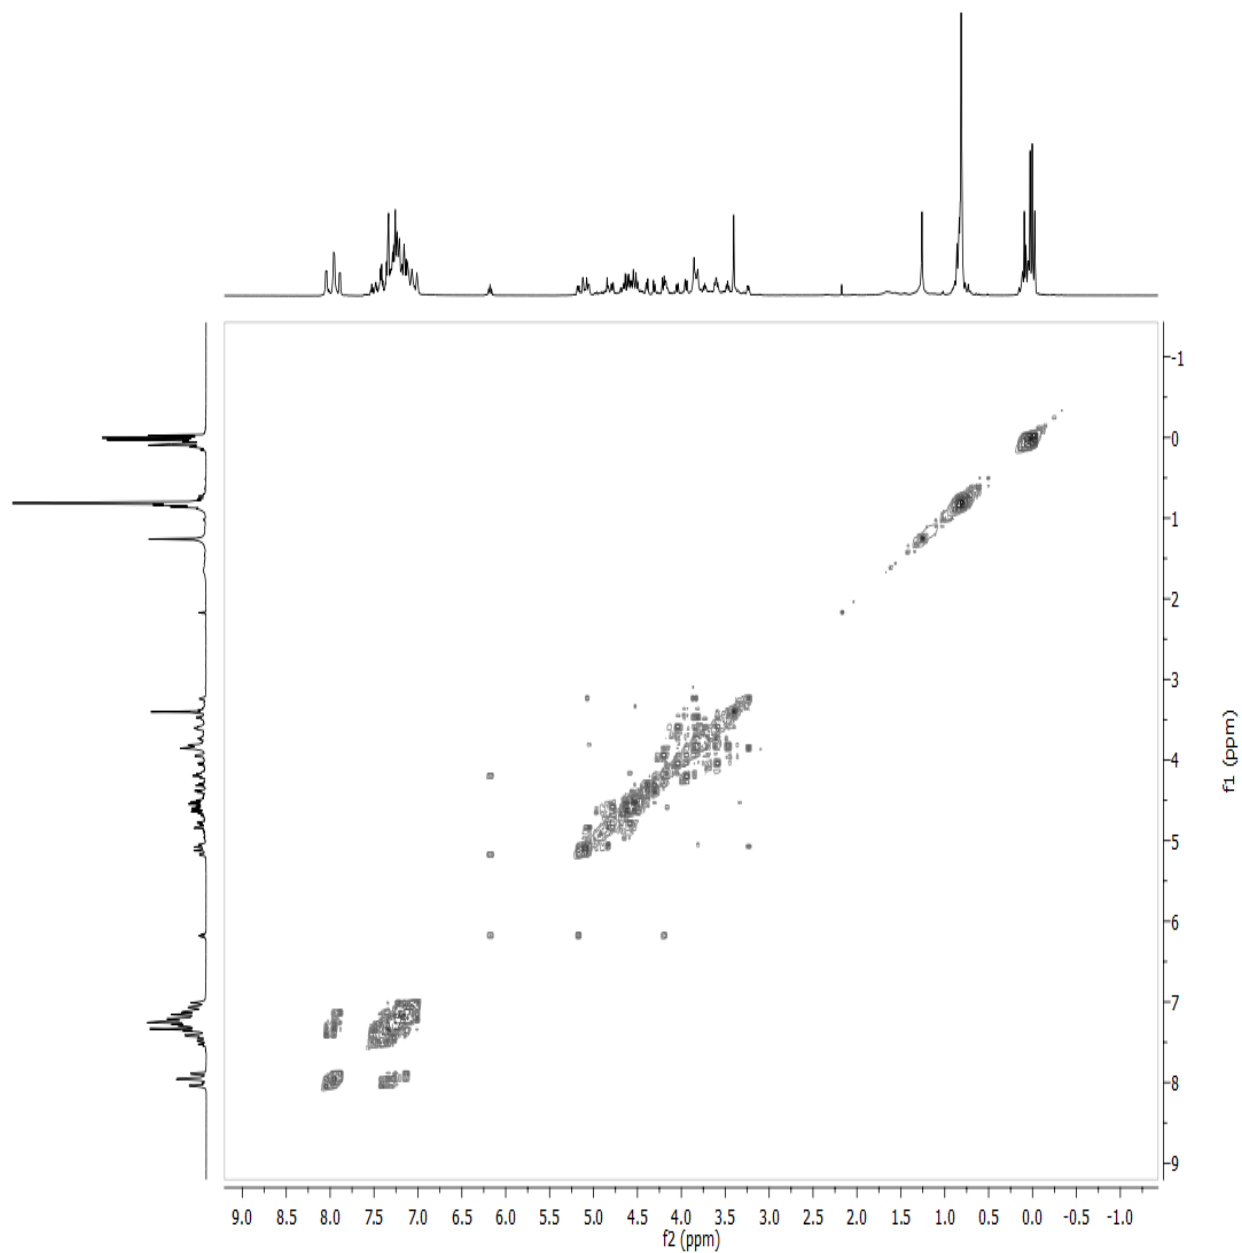

$\text{CDCl}_3$  600 MHz

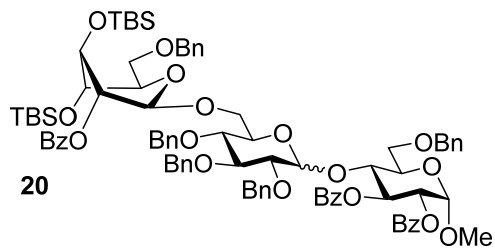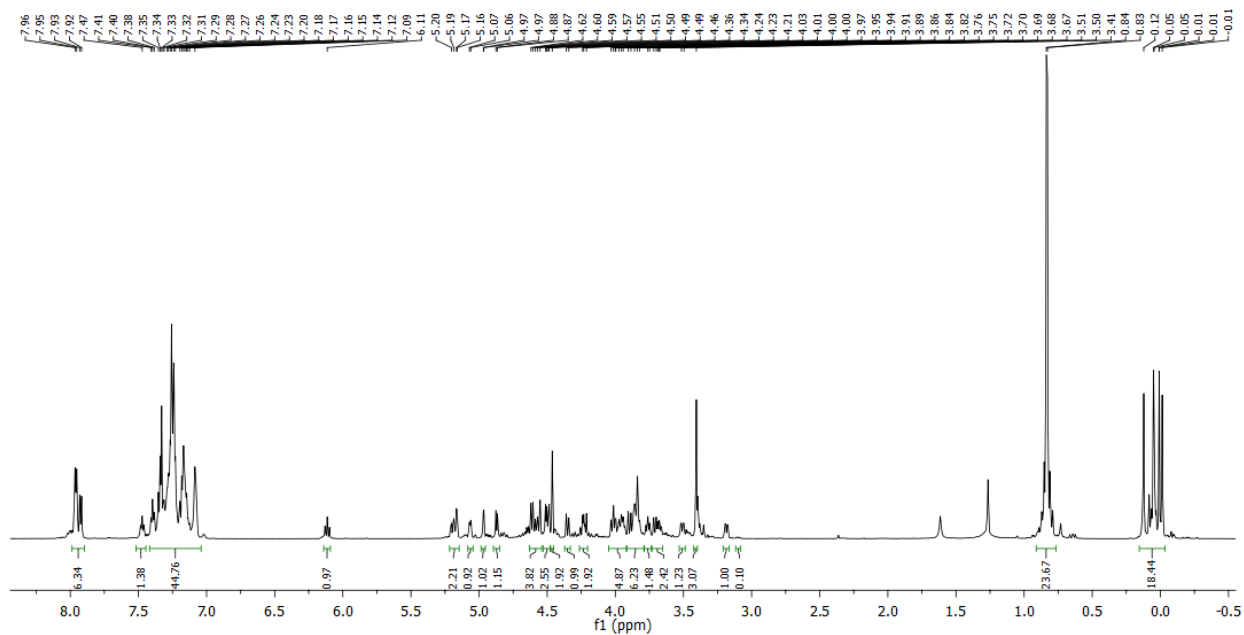

CDCl<sub>3</sub> 300 MHz

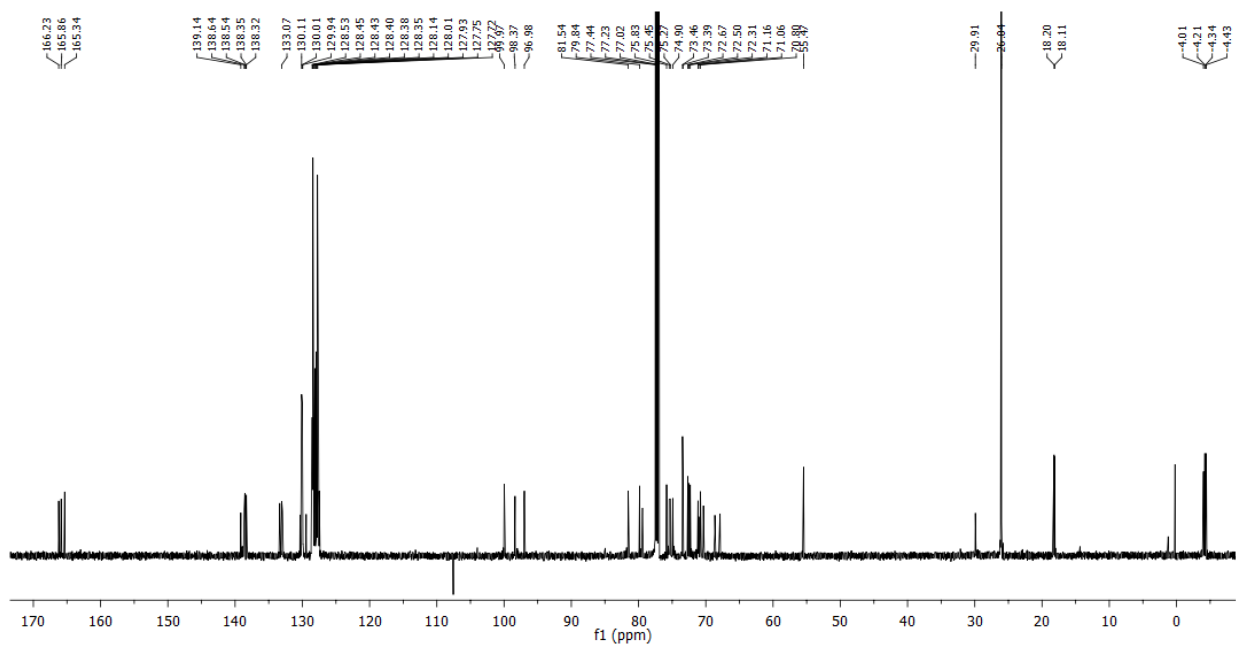

CDCl<sub>3</sub> 150 MHz



## X-Ray Data for Disaccharide 10

**Table 1S. Crystal data and structure refinement for 10.**

|                                   |                                                                 |                 |
|-----------------------------------|-----------------------------------------------------------------|-----------------|
| Identification code               | a24115/lt/x8/100K/Mithila/M1                                    |                 |
| Empirical formula                 | C <sub>60</sub> H <sub>80</sub> O <sub>12</sub> Si <sub>2</sub> |                 |
| Formula weight                    | 1049.42                                                         |                 |
| Temperature                       | 100(2) K                                                        |                 |
| Wavelength                        | 0.71073 Å                                                       |                 |
| Crystal system                    | Monoclinic                                                      |                 |
| Space group                       | P2 <sub>1</sub>                                                 |                 |
| Unit cell dimensions              | a = 10.6177(6) Å                                                | α = 90°.        |
|                                   | b = 12.3153(7) Å                                                | β = 91.573(4)°. |
|                                   | c = 22.9275(13) Å                                               | γ = 90°.        |
| Volume                            | 2996.9(3) Å <sup>3</sup>                                        |                 |
| Z                                 | 2                                                               |                 |
| Density (calculated)              | 1.163 Mg/m <sup>3</sup>                                         |                 |
| Absorption coefficient            | 0.117 mm <sup>-1</sup>                                          |                 |
| F(000)                            | 1128                                                            |                 |
| Crystal size                      | 0.324 x 0.121 x 0.098 mm <sup>3</sup>                           |                 |
| Theta range for data collection   | 1.777 to 24.999°.                                               |                 |
| Index ranges                      | -12 ≤ h ≤ 12, -14 ≤ k ≤ 14, -27 ≤ l ≤ 27                        |                 |
| Reflections collected             | 41545                                                           |                 |
| Independent reflections           | 10462 [R(int) = 0.0729]                                         |                 |
| Completeness to theta = 24.999°   | 99.9 %                                                          |                 |
| Absorption correction             | Semi-empirical from equivalents                                 |                 |
| Max. and min. transmission        | 0.8620 and 0.7753                                               |                 |
| Refinement method                 | Full-matrix least-squares on F <sup>2</sup>                     |                 |
| Data / restraints / parameters    | 10462 / 919 / 860                                               |                 |
| Goodness-of-fit on F <sup>2</sup> | 1.017                                                           |                 |
| Final R indices [I > 2σ(I)]       | R1 = 0.0616, wR2 = 0.1338                                       |                 |
| R indices (all data)              | R1 = 0.1417, wR2 = 0.1714                                       |                 |
| Absolute structure parameter      | -0.02(11)                                                       |                 |
| Largest diff. peak and hole       | 0.313 and -0.316 e.Å <sup>-3</sup>                              |                 |

**Table 2S. Atomic coordinates (  $\times 10^4$ ) and equivalent isotropic displacement parameters ( $\text{\AA}^2 \times 10^3$ ) for 10. U(eq) is defined as one third of the trace of the orthogonalized  $U^{ij}$  tensor.**

|        | x        | y         | z        | U(eq) |
|--------|----------|-----------|----------|-------|
| O(1)   | 864(4)   | 2589(4)   | 9027(2)  | 65(1) |
| O(2)   | 1542(4)  | 3465(4)   | 8183(2)  | 60(1) |
| O(3)   | 4620(4)  | 3987(4)   | 8878(2)  | 57(1) |
| O(4)   | 4610(4)  | 1689(4)   | 8816(2)  | 62(1) |
| O(5)   | 2131(4)  | 721(4)    | 8720(2)  | 58(1) |
| O(6)   | 3120(4)  | 5009(3)   | 7637(2)  | 52(1) |
| O(7)   | 2414(4)  | 6635(4)   | 7284(2)  | 67(1) |
| O(9)   | 4996(4)  | 7988(4)   | 7117(2)  | 54(1) |
| O(10)  | 3239(9)  | 6668(11)  | 5933(4)  | 43(3) |
| O(11)  | 5420(4)  | 5519(3)   | 6988(2)  | 44(1) |
| O(12)  | 5615(5)  | 4707(6)   | 6120(2)  | 86(2) |
| C(1)   | 1260(6)  | 2462(6)   | 8453(4)  | 61(2) |
| C(2)   | 2429(6)  | 1742(6)   | 8468(3)  | 59(2) |
| C(3)   | 3471(6)  | 2310(6)   | 8807(4)  | 59(2) |
| C(4)   | 3724(6)  | 3400(5)   | 8526(3)  | 56(2) |
| C(5)   | 2514(6)  | 4060(5)   | 8496(3)  | 57(2) |
| C(6)   | 2636(6)  | 5144(6)   | 8208(4)  | 62(2) |
| C(7)   | 3494(6)  | 5990(5)   | 7396(3)  | 48(2) |
| C(8)   | 4126(6)  | 5776(5)   | 6822(3)  | 50(2) |
| C(9)   | 4063(7)  | 6770(6)   | 6421(3)  | 65(2) |
| C(10)  | 3877(7)  | 7810(6)   | 6760(4)  | 66(2) |
| C(11)  | 2753(7)  | 7739(6)   | 7173(4)  | 71(2) |
| O(8)   | 1691(12) | 9344(8)   | 7041(8)  | 47(4) |
| C(12)  | 1406(17) | 8209(15)  | 7075(10) | 46(5) |
| C(13)  | 822(15)  | 10024(12) | 6730(9)  | 44(4) |
| C(14)  | 1565(10) | 11005(7)  | 6566(7)  | 40(4) |
| C(15)  | 1790(10) | 11821(8)  | 6974(6)  | 45(4) |
| C(16)  | 2569(10) | 12688(8)  | 6841(7)  | 49(4) |
| C(17)  | 3125(10) | 12739(9)  | 6300(7)  | 47(5) |
| C(18)  | 2900(9)  | 11923(10) | 5892(7)  | 54(5) |
| C(19)  | 2120(10) | 11056(8)  | 6024(7)  | 45(5) |
| O(8')  | 2108(10) | 9402(7)   | 6686(7)  | 45(3) |
| C(12') | 1708(16) | 8331(14)  | 6790(11) | 52(5) |
| C(13') | 1150(14) | 10013(13) | 6372(11) | 61(5) |
| C(14') | 1704(10) | 11091(7)  | 6198(8)  | 48(4) |
| C(15') | 1861(10) | 11893(8)  | 6620(7)  | 53(4) |
| C(16') | 2464(10) | 12859(7)  | 6485(7)  | 61(5) |
| C(17') | 2909(9)  | 13023(7)  | 5927(8)  | 61(5) |
| C(18') | 2751(8)  | 12220(9)  | 5505(7)  | 60(5) |
| C(19') | 2149(9)  | 11254(8)  | 5641(8)  | 57(4) |
| C(20)  | 7315(15) | 8260(13)  | 6365(6)  | 59(4) |
| C(21)  | 7323(16) | 8526(17)  | 7686(7)  | 63(5) |
| C(22)  | 5998(10) | 10214(8)  | 6911(5)  | 53(3) |
| C(23)  | 5445(12) | 10498(12) | 6308(6)  | 60(4) |
| C(24)  | 7194(11) | 10905(11) | 7011(7)  | 65(4) |
| C(25)  | 5025(12) | 10553(13) | 7358(7)  | 58(4) |
| C(26)  | 4173(12) | 8126(9)   | 5076(6)  | 47(3) |
| C(27)  | 4561(12) | 5714(11)  | 4978(6)  | 59(4) |
| C(28)  | 1868(10) | 6637(10)  | 4878(5)  | 53(3) |
| C(29)  | 1317(15) | 5539(12)  | 5056(7)  | 81(5) |

|        |          |           |         |        |
|--------|----------|-----------|---------|--------|
| C(30)  | 1965(14) | 6658(14)  | 4211(5) | 64(4)  |
| C(31)  | 990(16)  | 7557(16)  | 5053(8) | 74(5)  |
| C(32)  | 6085(6)  | 4996(6)   | 6575(3) | 54(2)  |
| C(33)  | 7406(3)  | 4841(5)   | 6762(2) | 53(2)  |
| C(34)  | 7854(4)  | 5115(5)   | 7318(2) | 69(2)  |
| C(35)  | 9123(4)  | 4983(6)   | 7466(2) | 89(3)  |
| C(36)  | 9944(3)  | 4577(6)   | 7057(3) | 84(3)  |
| C(37)  | 9496(4)  | 4303(6)   | 6501(3) | 116(4) |
| C(38)  | 8227(5)  | 4435(6)   | 6354(2) | 108(4) |
| C(39)  | 5744(5)  | 4252(6)   | 8580(3) | 56(2)  |
| C(40)  | 6543(4)  | 4947(4)   | 8976(2) | 53(2)  |
| C(41)  | 7125(4)  | 4500(3)   | 9471(2) | 60(2)  |
| C(42)  | 7851(4)  | 5151(4)   | 9844(2) | 71(2)  |
| C(43)  | 7995(4)  | 6249(4)   | 9723(2) | 80(2)  |
| C(44)  | 7413(5)  | 6696(3)   | 9228(3) | 86(3)  |
| C(45)  | 6687(4)  | 6045(4)   | 8855(2) | 73(2)  |
| C(46)  | 4886(6)  | 1209(6)   | 9361(4) | 77(2)  |
| C(47)  | 6175(3)  | 680(4)    | 9377(2) | 70(2)  |
| C(48)  | 7149(4)  | 1079(4)   | 9045(3) | 106(3) |
| C(49)  | 8344(4)  | 623(4)    | 9098(3) | 106(3) |
| C(50)  | 8566(3)  | -231(4)   | 9484(3) | 84(3)  |
| C(51)  | 7592(4)  | -629(3)   | 9816(2) | 64(2)  |
| C(52)  | 6397(3)  | -174(4)   | 9762(2) | 59(2)  |
| C(53)  | 2798(13) | -208(9)   | 8496(7) | 50(4)  |
| C(54)  | 2351(12) | -1226(9)  | 8778(6) | 44(4)  |
| C(55)  | 3131(9)  | -1809(11) | 9161(7) | 71(5)  |
| C(56)  | 2690(16) | -2748(9)  | 9422(6) | 86(7)  |
| C(57)  | 1468(17) | -3104(8)  | 9301(5) | 73(5)  |
| C(58)  | 688(9)   | -2521(11) | 8918(6) | 52(5)  |
| C(59)  | 1130(11) | -1582(11) | 8656(6) | 38(5)  |
| C(53') | 1940(20) | -101(10)  | 8251(6) | 62(5)  |
| C(59') | 2018(14) | -1159(9)  | 8585(6) | 38(4)  |
| C(58') | 937(9)   | -1712(13) | 8743(7) | 44(6)  |
| C(57') | 1035(9)  | -2634(11) | 9091(7) | 50(5)  |
| C(56') | 2213(13) | -3005(9)  | 9281(6) | 58(5)  |
| C(55') | 3294(9)  | -2452(12) | 9123(6) | 61(5)  |
| C(54') | 3196(10) | -1530(10) | 8775(6) | 51(4)  |
| C(60)  | -257(6)  | 3227(6)   | 9075(4) | 67(2)  |
| Si(1)  | 6389(6)  | 8727(5)   | 7001(3) | 48(2)  |
| Si(2)  | 3477(4)  | 6781(4)   | 5221(2) | 44(1)  |
| Si(1') | 5875(6)  | 8968(5)   | 6978(3) | 49(2)  |
| Si(2') | 2686(4)  | 6418(3)   | 5416(2) | 46(1)  |
| O(10') | 2737(10) | 6620(10)  | 6128(4) | 41(3)  |
| C(20') | 5075(16) | 10299(10) | 6935(9) | 68(5)  |
| C(21') | 6587(15) | 8583(15)  | 6271(5) | 60(4)  |
| C(22') | 7082(12) | 8892(11)  | 7584(5) | 47(4)  |
| C(23') | 7797(13) | 7810(12)  | 7570(7) | 57(4)  |
| C(24') | 8001(13) | 9843(12)  | 7537(7) | 68(4)  |
| C(25') | 6435(12) | 8960(12)  | 8172(5) | 49(3)  |
| C(26') | 2665(13) | 4943(9)   | 5259(6) | 58(4)  |
| C(27') | 4098(14) | 7067(17)  | 5090(7) | 67(5)  |
| C(28') | 1170(11) | 7037(10)  | 5148(5) | 53(4)  |
| C(29') | 1228(17) | 8272(11)  | 5228(8) | 76(5)  |
| C(30') | 985(16)  | 6803(15)  | 4494(6) | 69(4)  |
| C(31') | 56(11)   | 6586(14)  | 5479(6) | 66(4)  |

**Table 3S. Bond lengths [Å] and angles [°] for 10.**

|              |           |               |           |
|--------------|-----------|---------------|-----------|
| O(1)-C(1)    | 1.403(9)  | C(13)-H(13A)  | 0.9900    |
| O(1)-C(60)   | 1.433(7)  | C(13)-H(13B)  | 0.9900    |
| O(2)-C(1)    | 1.417(8)  | C(14)-C(15)   | 1.3900    |
| O(2)-C(5)    | 1.441(8)  | C(14)-C(19)   | 1.3900    |
| O(3)-C(4)    | 1.427(8)  | C(15)-C(16)   | 1.3900    |
| O(3)-C(39)   | 1.430(7)  | C(15)-H(15A)  | 0.9500    |
| O(4)-C(46)   | 1.405(9)  | C(16)-C(17)   | 1.3900    |
| O(4)-C(3)    | 1.431(7)  | C(16)-H(16A)  | 0.9500    |
| O(5)-C(2)    | 1.422(8)  | C(17)-C(18)   | 1.3900    |
| O(5)-C(53)   | 1.448(11) | C(17)-H(17A)  | 0.9500    |
| O(5)-C(53')  | 1.489(12) | C(18)-C(19)   | 1.3900    |
| O(6)-C(7)    | 1.390(7)  | C(18)-H(18A)  | 0.9500    |
| O(6)-C(6)    | 1.429(8)  | C(19)-H(19A)  | 0.9500    |
| O(7)-C(7)    | 1.413(7)  | O(8')-C(12')  | 1.408(18) |
| O(7)-C(11)   | 1.431(9)  | O(8')-C(13')  | 1.442(15) |
| O(9)-C(10)   | 1.440(7)  | C(12')-H(12C) | 0.9900    |
| O(9)-Si(1')  | 1.564(7)  | C(12')-H(12D) | 0.9900    |
| O(9)-Si(1)   | 1.763(7)  | C(13')-C(14') | 1.510(17) |
| O(10)-C(9)   | 1.408(11) | C(13')-H(13C) | 0.9900    |
| O(10)-Si(2)  | 1.664(9)  | C(13')-H(13D) | 0.9900    |
| O(11)-C(32)  | 1.359(8)  | C(14')-C(15') | 1.3900    |
| O(11)-C(8)   | 1.450(7)  | C(14')-C(19') | 1.3900    |
| O(12)-C(32)  | 1.199(8)  | C(15')-C(16') | 1.3900    |
| C(1)-C(2)    | 1.525(9)  | C(15')-H(15B) | 0.9500    |
| C(1)-H(1A)   | 1.0000    | C(16')-C(17') | 1.3900    |
| C(2)-C(3)    | 1.507(9)  | C(16')-H(16B) | 0.9500    |
| C(2)-H(2A)   | 1.0000    | C(17')-C(18') | 1.3900    |
| C(3)-C(4)    | 1.516(10) | C(17')-H(17B) | 0.9500    |
| C(3)-H(3A)   | 1.0000    | C(18')-C(19') | 1.3900    |
| C(4)-C(5)    | 1.521(9)  | C(18')-H(18B) | 0.9500    |
| C(4)-H(4A)   | 1.0000    | C(19')-H(19B) | 0.9500    |
| C(5)-C(6)    | 1.496(10) | C(20)-Si(1)   | 1.871(11) |
| C(5)-H(5A)   | 1.0000    | C(20)-H(20A)  | 0.9800    |
| C(6)-H(6A)   | 0.9900    | C(20)-H(20B)  | 0.9800    |
| C(6)-H(6B)   | 0.9900    | C(20)-H(20C)  | 0.9800    |
| C(7)-C(8)    | 1.517(9)  | C(21)-Si(1)   | 1.851(12) |
| C(7)-H(7A)   | 1.0000    | C(21)-H(21A)  | 0.9800    |
| C(8)-C(9)    | 1.532(10) | C(21)-H(21B)  | 0.9800    |
| C(8)-H(8A)   | 1.0000    | C(21)-H(21C)  | 0.9800    |
| C(9)-C(10)   | 1.514(10) | C(22)-C(23)   | 1.529(10) |
| C(9)-O(10')  | 1.555(12) | C(22)-C(25)   | 1.533(10) |
| C(9)-H(9)    | 1.0000    | C(22)-C(24)   | 1.541(10) |
| C(10)-C(11)  | 1.545(11) | C(22)-Si(1)   | 1.888(10) |
| C(10)-H(10A) | 1.0000    | C(23)-H(23A)  | 0.9800    |
| C(11)-C(12)  | 1.553(18) | C(23)-H(23B)  | 0.9800    |
| C(11)-C(12') | 1.574(17) | C(23)-H(23C)  | 0.9800    |
| C(11)-H(11)  | 1.0000    | C(24)-H(24A)  | 0.9800    |
| O(8)-C(13)   | 1.424(16) | C(24)-H(24B)  | 0.9800    |
| O(8)-C(12)   | 1.43(2)   | C(24)-H(24C)  | 0.9800    |
| C(12)-H(12A) | 0.9900    | C(25)-H(25A)  | 0.9800    |
| C(12)-H(12B) | 0.9900    | C(25)-H(25B)  | 0.9800    |
| C(13)-C(14)  | 1.497(17) | C(25)-H(25C)  | 0.9800    |
|              |           | C(26)-Si(2)   | 1.847(10) |



|              |           |               |           |
|--------------|-----------|---------------|-----------|
| C(26)-H(26A) | 0.9800    | C(50)-C(51)   | 1.3900    |
| C(26)-H(26B) | 0.9800    | C(50)-H(50A)  | 0.9500    |
| C(26)-H(26C) | 0.9800    | C(51)-C(52)   | 1.3900    |
| C(27)-Si(2)  | 1.843(10) | C(51)-H(51A)  | 0.9500    |
| C(27)-H(27A) | 0.9800    | C(52)-H(52A)  | 0.9500    |
| C(27)-H(27B) | 0.9800    | C(53)-C(54)   | 1.494(12) |
| C(27)-H(27C) | 0.9800    | C(53)-H(53A)  | 0.9900    |
| C(28)-C(31)  | 1.528(11) | C(53)-H(53B)  | 0.9900    |
| C(28)-C(29)  | 1.534(10) | C(54)-C(55)   | 1.3900    |
| C(28)-C(30)  | 1.535(10) | C(54)-C(59)   | 1.3900    |
| C(28)-Si(2)  | 1.869(10) | C(55)-C(56)   | 1.3900    |
| C(29)-H(29A) | 0.9800    | C(55)-H(55A)  | 0.9500    |
| C(29)-H(29B) | 0.9800    | C(56)-C(57)   | 1.3900    |
| C(29)-H(29C) | 0.9800    | C(56)-H(56A)  | 0.9500    |
| C(30)-H(30A) | 0.9800    | C(57)-C(58)   | 1.3900    |
| C(30)-H(30B) | 0.9800    | C(57)-H(57A)  | 0.9500    |
| C(30)-H(30C) | 0.9800    | C(58)-C(59)   | 1.3900    |
| C(31)-H(31A) | 0.9800    | C(58)-H(58A)  | 0.9500    |
| C(31)-H(31B) | 0.9800    | C(59)-H(59A)  | 0.9500    |
| C(31)-H(31C) | 0.9800    | C(53')-C(59') | 1.513(13) |
| C(32)-C(33)  | 1.468(8)  | C(53')-H(53C) | 0.9900    |
| C(33)-C(34)  | 1.3900    | C(53')-H(53D) | 0.9900    |
| C(33)-C(38)  | 1.3900    | C(59')-C(58') | 1.3900    |
| C(34)-C(35)  | 1.3900    | C(59')-C(54') | 1.3900    |
| C(34)-H(34A) | 0.9500    | C(58')-C(57') | 1.3900    |
| C(35)-C(36)  | 1.3900    | C(58')-H(58B) | 0.9500    |
| C(35)-H(35A) | 0.9500    | C(57')-C(56') | 1.3900    |
| C(36)-C(37)  | 1.3900    | C(57')-H(57B) | 0.9500    |
| C(36)-H(36A) | 0.9500    | C(56')-C(55') | 1.3900    |
| C(37)-C(38)  | 1.3900    | C(56')-H(56B) | 0.9500    |
| C(37)-H(37A) | 0.9500    | C(55')-C(54') | 1.3900    |
| C(38)-H(38A) | 0.9500    | C(55')-H(55B) | 0.9500    |
| C(39)-C(40)  | 1.495(8)  | C(54')-H(54A) | 0.9500    |
| C(39)-H(39A) | 0.9900    | C(60)-H(60A)  | 0.9800    |
| C(39)-H(39B) | 0.9900    | C(60)-H(60B)  | 0.9800    |
| C(40)-C(41)  | 1.3900    | C(60)-H(60C)  | 0.9800    |
| C(40)-C(45)  | 1.3900    | Si(1')-C(20') | 1.847(11) |
| C(41)-C(42)  | 1.3900    | Si(1')-C(22') | 1.867(11) |
| C(41)-H(41A) | 0.9500    | Si(1')-C(21') | 1.869(11) |
| C(42)-C(43)  | 1.3900    | Si(2')-O(10') | 1.651(9)  |
| C(42)-H(42A) | 0.9500    | Si(2')-C(26') | 1.852(11) |
| C(43)-C(44)  | 1.3900    | Si(2')-C(28') | 1.869(11) |
| C(43)-H(43A) | 0.9500    | Si(2')-C(27') | 1.872(12) |
| C(44)-C(45)  | 1.3900    | C(20')-H(20D) | 0.9800    |
| C(44)-H(44A) | 0.9500    | C(20')-H(20E) | 0.9800    |
| C(45)-H(45A) | 0.9500    | C(20')-H(20F) | 0.9800    |
| C(46)-C(47)  | 1.516(7)  | C(21')-H(21D) | 0.9800    |
| C(46)-H(46A) | 0.9900    | C(21')-H(21E) | 0.9800    |
| C(46)-H(46B) | 0.9900    | C(21')-H(21F) | 0.9800    |
| C(47)-C(48)  | 1.3900    | C(22')-C(24') | 1.530(10) |
| C(47)-C(52)  | 1.3900    | C(22')-C(25') | 1.533(10) |
| C(48)-C(49)  | 1.3900    | C(22')-C(23') | 1.534(10) |
| C(48)-H(48A) | 0.9500    | C(23')-H(23D) | 0.9800    |
| C(49)-C(50)  | 1.3900    | C(23')-H(23E) | 0.9800    |
| C(49)-H(49A) | 0.9500    | C(23')-H(23F) | 0.9800    |

|                   |           |                    |           |
|-------------------|-----------|--------------------|-----------|
| C(24')-H(24D)     | 0.9800    | O(3)-C(4)-C(3)     | 109.4(6)  |
| C(24')-H(24E)     | 0.9800    | O(3)-C(4)-C(5)     | 107.7(5)  |
| C(24')-H(24F)     | 0.9800    | C(3)-C(4)-C(5)     | 109.5(5)  |
| C(25')-H(25D)     | 0.9800    | O(3)-C(4)-H(4A)    | 110.1     |
| C(25')-H(25E)     | 0.9800    | C(3)-C(4)-H(4A)    | 110.1     |
| C(25')-H(25F)     | 0.9800    | C(5)-C(4)-H(4A)    | 110.1     |
| C(26')-H(26D)     | 0.9800    | O(2)-C(5)-C(6)     | 107.6(6)  |
| C(26')-H(26E)     | 0.9800    | O(2)-C(5)-C(4)     | 110.1(5)  |
| C(26')-H(26F)     | 0.9800    | C(6)-C(5)-C(4)     | 114.5(5)  |
| C(27')-H(27D)     | 0.9800    | O(2)-C(5)-H(5A)    | 108.1     |
| C(27')-H(27E)     | 0.9800    | C(6)-C(5)-H(5A)    | 108.1     |
| C(27')-H(27F)     | 0.9800    | C(4)-C(5)-H(5A)    | 108.1     |
| C(28')-C(31')     | 1.527(10) | O(6)-C(6)-C(5)     | 109.7(5)  |
| C(28')-C(29')     | 1.533(11) | O(6)-C(6)-H(6A)    | 109.7     |
| C(28')-C(30')     | 1.534(10) | C(5)-C(6)-H(6A)    | 109.7     |
| C(29')-H(29D)     | 0.9800    | O(6)-C(6)-H(6B)    | 109.7     |
| C(29')-H(29E)     | 0.9800    | C(5)-C(6)-H(6B)    | 109.7     |
| C(29')-H(29F)     | 0.9800    | H(6A)-C(6)-H(6B)   | 108.2     |
| C(30')-H(30D)     | 0.9800    | O(6)-C(7)-O(7)     | 108.8(5)  |
| C(30')-H(30E)     | 0.9800    | O(6)-C(7)-C(8)     | 109.3(5)  |
| C(30')-H(30F)     | 0.9800    | O(7)-C(7)-C(8)     | 108.4(5)  |
| C(31')-H(31D)     | 0.9800    | O(6)-C(7)-H(7A)    | 110.1     |
| C(31')-H(31E)     | 0.9800    | O(7)-C(7)-H(7A)    | 110.1     |
| C(31')-H(31F)     | 0.9800    | C(8)-C(7)-H(7A)    | 110.1     |
|                   |           | O(11)-C(8)-C(7)    | 104.4(5)  |
| C(1)-O(1)-C(60)   | 113.9(6)  | O(11)-C(8)-C(9)    | 111.0(5)  |
| C(1)-O(2)-C(5)    | 112.5(6)  | C(7)-C(8)-C(9)     | 111.6(6)  |
| C(4)-O(3)-C(39)   | 113.4(5)  | O(11)-C(8)-H(8A)   | 109.9     |
| C(46)-O(4)-C(3)   | 113.2(5)  | C(7)-C(8)-H(8A)    | 109.9     |
| C(2)-O(5)-C(53)   | 115.9(6)  | C(9)-C(8)-H(8A)    | 109.9     |
| C(2)-O(5)-C(53')  | 109.6(7)  | O(10)-C(9)-C(10)   | 113.4(7)  |
| C(7)-O(6)-C(6)    | 112.0(5)  | O(10)-C(9)-C(8)    | 114.9(7)  |
| C(7)-O(7)-C(11)   | 111.1(5)  | C(10)-C(9)-C(8)    | 111.9(6)  |
| C(10)-O(9)-Si(1') | 119.2(5)  | C(10)-C(9)-O(10')  | 101.2(7)  |
| C(10)-O(9)-Si(1)  | 132.4(5)  | C(8)-C(9)-O(10')   | 100.9(7)  |
| C(9)-O(10)-Si(2)  | 131.7(8)  | O(10)-C(9)-H(9)    | 105.2     |
| C(32)-O(11)-C(8)  | 115.3(5)  | C(10)-C(9)-H(9)    | 105.2     |
| O(1)-C(1)-O(2)    | 112.7(5)  | C(8)-C(9)-H(9)     | 105.2     |
| O(1)-C(1)-C(2)    | 107.9(6)  | O(9)-C(10)-C(9)    | 107.6(6)  |
| O(2)-C(1)-C(2)    | 109.7(5)  | O(9)-C(10)-C(11)   | 107.5(6)  |
| O(1)-C(1)-H(1A)   | 108.8     | C(9)-C(10)-C(11)   | 112.3(6)  |
| O(2)-C(1)-H(1A)   | 108.8     | O(9)-C(10)-H(10A)  | 109.8     |
| C(2)-C(1)-H(1A)   | 108.8     | C(9)-C(10)-H(10A)  | 109.8     |
| O(5)-C(2)-C(3)    | 111.7(6)  | C(11)-C(10)-H(10A) | 109.8     |
| O(5)-C(2)-C(1)    | 109.5(5)  | O(7)-C(11)-C(10)   | 111.4(6)  |
| C(3)-C(2)-C(1)    | 109.1(6)  | O(7)-C(11)-C(12)   | 98.3(9)   |
| O(5)-C(2)-H(2A)   | 108.8     | C(10)-C(11)-C(12)  | 127.9(11) |
| C(3)-C(2)-H(2A)   | 108.8     | O(7)-C(11)-C(12')  | 111.2(8)  |
| C(1)-C(2)-H(2A)   | 108.8     | C(10)-C(11)-C(12') | 100.2(10) |
| O(4)-C(3)-C(2)    | 111.6(6)  | O(7)-C(11)-H(11)   | 105.8     |
| O(4)-C(3)-C(4)    | 108.6(5)  | C(10)-C(11)-H(11)  | 105.8     |
| C(2)-C(3)-C(4)    | 109.2(6)  | C(12)-C(11)-H(11)  | 105.8     |
| O(4)-C(3)-H(3A)   | 109.1     | C(13)-O(8)-C(12)   | 117.8(12) |
| C(2)-C(3)-H(3A)   | 109.1     | O(8)-C(12)-C(11)   | 100.1(12) |
| C(4)-C(3)-H(3A)   | 109.1     | O(8)-C(12)-H(12A)  | 111.7     |

|                      |           |                      |           |
|----------------------|-----------|----------------------|-----------|
| C(11)-C(12)-H(12A)   | 111.7     | C(17')-C(18')-H(18B) | 120.0     |
| O(8)-C(12)-H(12B)    | 111.7     | C(18')-C(19')-C(14') | 120.0     |
| C(11)-C(12)-H(12B)   | 111.7     | C(18')-C(19')-H(19B) | 120.0     |
| H(12A)-C(12)-H(12B)  | 109.5     | C(14')-C(19')-H(19B) | 120.0     |
| O(8)-C(13)-C(14)     | 105.2(11) | Si(1)-C(20)-H(20A)   | 109.5     |
| O(8)-C(13)-H(13A)    | 110.7     | Si(1)-C(20)-H(20B)   | 109.5     |
| C(14)-C(13)-H(13A)   | 110.7     | H(20A)-C(20)-H(20B)  | 109.5     |
| O(8)-C(13)-H(13B)    | 110.7     | Si(1)-C(20)-H(20C)   | 109.5     |
| C(14)-C(13)-H(13B)   | 110.7     | H(20A)-C(20)-H(20C)  | 109.5     |
| H(13A)-C(13)-H(13B)  | 108.8     | H(20B)-C(20)-H(20C)  | 109.5     |
| C(15)-C(14)-C(19)    | 120.0     | Si(1)-C(21)-H(21A)   | 109.5     |
| C(15)-C(14)-C(13)    | 119.7(9)  | Si(1)-C(21)-H(21B)   | 109.5     |
| C(19)-C(14)-C(13)    | 120.0(9)  | H(21A)-C(21)-H(21B)  | 109.5     |
| C(14)-C(15)-C(16)    | 120.0     | Si(1)-C(21)-H(21C)   | 109.5     |
| C(14)-C(15)-H(15A)   | 120.0     | H(21A)-C(21)-H(21C)  | 109.5     |
| C(16)-C(15)-H(15A)   | 120.0     | H(21B)-C(21)-H(21C)  | 109.5     |
| C(17)-C(16)-C(15)    | 120.0     | C(23)-C(22)-C(25)    | 107.0(11) |
| C(17)-C(16)-H(16A)   | 120.0     | C(23)-C(22)-C(24)    | 107.6(10) |
| C(15)-C(16)-H(16A)   | 120.0     | C(25)-C(22)-C(24)    | 108.6(11) |
| C(16)-C(17)-C(18)    | 120.0     | C(23)-C(22)-Si(1)    | 113.4(8)  |
| C(16)-C(17)-H(17A)   | 120.0     | C(25)-C(22)-Si(1)    | 110.0(9)  |
| C(18)-C(17)-H(17A)   | 120.0     | C(24)-C(22)-Si(1)    | 110.0(8)  |
| C(19)-C(18)-C(17)    | 120.0     | C(22)-C(23)-H(23A)   | 109.5     |
| C(19)-C(18)-H(18A)   | 120.0     | C(22)-C(23)-H(23B)   | 109.5     |
| C(17)-C(18)-H(18A)   | 120.0     | H(23A)-C(23)-H(23B)  | 109.5     |
| C(18)-C(19)-C(14)    | 120.0     | C(22)-C(23)-H(23C)   | 109.5     |
| C(18)-C(19)-H(19A)   | 120.0     | H(23A)-C(23)-H(23C)  | 109.5     |
| C(14)-C(19)-H(19A)   | 120.0     | H(23B)-C(23)-H(23C)  | 109.5     |
| C(12')-O(8')-C(13')  | 111.2(11) | C(22)-C(24)-H(24A)   | 109.5     |
| O(8')-C(12')-C(11)   | 108.5(12) | C(22)-C(24)-H(24B)   | 109.5     |
| O(8')-C(12')-H(12C)  | 110.0     | H(24A)-C(24)-H(24B)  | 109.5     |
| C(11)-C(12')-H(12C)  | 110.0     | C(22)-C(24)-H(24C)   | 109.5     |
| O(8')-C(12')-H(12D)  | 110.0     | H(24A)-C(24)-H(24C)  | 109.5     |
| C(11)-C(12')-H(12D)  | 110.0     | H(24B)-C(24)-H(24C)  | 109.5     |
| H(12C)-C(12')-H(12D) | 108.4     | C(22)-C(25)-H(25A)   | 109.5     |
| O(8')-C(13')-C(14')  | 108.4(10) | C(22)-C(25)-H(25B)   | 109.5     |
| O(8')-C(13')-H(13C)  | 110.0     | H(25A)-C(25)-H(25B)  | 109.5     |
| C(14')-C(13')-H(13C) | 110.0     | C(22)-C(25)-H(25C)   | 109.5     |
| O(8')-C(13')-H(13D)  | 110.0     | H(25A)-C(25)-H(25C)  | 109.5     |
| C(14')-C(13')-H(13D) | 110.0     | H(25B)-C(25)-H(25C)  | 109.5     |
| H(13C)-C(13')-H(13D) | 108.4     | Si(2)-C(26)-H(26A)   | 109.5     |
| C(15')-C(14')-C(19') | 120.0     | Si(2)-C(26)-H(26B)   | 109.5     |
| C(15')-C(14')-C(13') | 118.8(10) | H(26A)-C(26)-H(26B)  | 109.5     |
| C(19')-C(14')-C(13') | 120.9(10) | Si(2)-C(26)-H(26C)   | 109.5     |
| C(14')-C(15')-C(16') | 120.0     | H(26A)-C(26)-H(26C)  | 109.5     |
| C(14')-C(15')-H(15B) | 120.0     | H(26B)-C(26)-H(26C)  | 109.5     |
| C(16')-C(15')-H(15B) | 120.0     | Si(2)-C(27)-H(27A)   | 109.5     |
| C(17')-C(16')-C(15') | 120.0     | Si(2)-C(27)-H(27B)   | 109.5     |
| C(17')-C(16')-H(16B) | 120.0     | H(27A)-C(27)-H(27B)  | 109.5     |
| C(15')-C(16')-H(16B) | 120.0     | Si(2)-C(27)-H(27C)   | 109.5     |
| C(16')-C(17')-C(18') | 120.0     | H(27A)-C(27)-H(27C)  | 109.5     |
| C(16')-C(17')-H(17B) | 120.0     | H(27B)-C(27)-H(27C)  | 109.5     |
| C(18')-C(17')-H(17B) | 120.0     | C(31)-C(28)-C(29)    | 110.1(13) |
| C(19')-C(18')-C(17') | 120.0     | C(31)-C(28)-C(30)    | 107.9(12) |
| C(19')-C(18')-H(18B) | 120.0     | C(29)-C(28)-C(30)    | 108.5(11) |

|                     |           |                     |           |
|---------------------|-----------|---------------------|-----------|
| C(31)-C(28)-Si(2)   | 112.1(10) | C(43)-C(42)-H(42A)  | 120.0     |
| C(29)-C(28)-Si(2)   | 108.8(8)  | C(41)-C(42)-H(42A)  | 120.0     |
| C(30)-C(28)-Si(2)   | 109.4(8)  | C(44)-C(43)-C(42)   | 120.0     |
| C(28)-C(29)-H(29A)  | 109.5     | C(44)-C(43)-H(43A)  | 120.0     |
| C(28)-C(29)-H(29B)  | 109.5     | C(42)-C(43)-H(43A)  | 120.0     |
| H(29A)-C(29)-H(29B) | 109.5     | C(45)-C(44)-C(43)   | 120.0     |
| C(28)-C(29)-H(29C)  | 109.5     | C(45)-C(44)-H(44A)  | 120.0     |
| H(29A)-C(29)-H(29C) | 109.5     | C(43)-C(44)-H(44A)  | 120.0     |
| H(29B)-C(29)-H(29C) | 109.5     | C(44)-C(45)-C(40)   | 120.0     |
| C(28)-C(30)-H(30A)  | 109.5     | C(44)-C(45)-H(45A)  | 120.0     |
| C(28)-C(30)-H(30B)  | 109.5     | C(40)-C(45)-H(45A)  | 120.0     |
| H(30A)-C(30)-H(30B) | 109.5     | O(4)-C(46)-C(47)    | 111.6(6)  |
| C(28)-C(30)-H(30C)  | 109.5     | O(4)-C(46)-H(46A)   | 109.3     |
| H(30A)-C(30)-H(30C) | 109.5     | C(47)-C(46)-H(46A)  | 109.3     |
| H(30B)-C(30)-H(30C) | 109.5     | O(4)-C(46)-H(46B)   | 109.3     |
| C(28)-C(31)-H(31A)  | 109.5     | C(47)-C(46)-H(46B)  | 109.3     |
| C(28)-C(31)-H(31B)  | 109.5     | H(46A)-C(46)-H(46B) | 108.0     |
| H(31A)-C(31)-H(31B) | 109.5     | C(48)-C(47)-C(52)   | 120.0     |
| C(28)-C(31)-H(31C)  | 109.5     | C(48)-C(47)-C(46)   | 121.3(4)  |
| H(31A)-C(31)-H(31C) | 109.5     | C(52)-C(47)-C(46)   | 118.5(4)  |
| H(31B)-C(31)-H(31C) | 109.5     | C(47)-C(48)-C(49)   | 120.0     |
| O(12)-C(32)-O(11)   | 122.4(6)  | C(47)-C(48)-H(48A)  | 120.0     |
| O(12)-C(32)-C(33)   | 126.0(7)  | C(49)-C(48)-H(48A)  | 120.0     |
| O(11)-C(32)-C(33)   | 111.6(6)  | C(48)-C(49)-C(50)   | 120.0     |
| C(34)-C(33)-C(38)   | 120.0     | C(48)-C(49)-H(49A)  | 120.0     |
| C(34)-C(33)-C(32)   | 122.5(4)  | C(50)-C(49)-H(49A)  | 120.0     |
| C(38)-C(33)-C(32)   | 117.5(4)  | C(51)-C(50)-C(49)   | 120.0     |
| C(33)-C(34)-C(35)   | 120.0     | C(51)-C(50)-H(50A)  | 120.0     |
| C(33)-C(34)-H(34A)  | 120.0     | C(49)-C(50)-H(50A)  | 120.0     |
| C(35)-C(34)-H(34A)  | 120.0     | C(52)-C(51)-C(50)   | 120.0     |
| C(34)-C(35)-C(36)   | 120.0     | C(52)-C(51)-H(51A)  | 120.0     |
| C(34)-C(35)-H(35A)  | 120.0     | C(50)-C(51)-H(51A)  | 120.0     |
| C(36)-C(35)-H(35A)  | 120.0     | C(51)-C(52)-C(47)   | 120.0     |
| C(37)-C(36)-C(35)   | 120.0     | C(51)-C(52)-H(52A)  | 120.0     |
| C(37)-C(36)-H(36A)  | 120.0     | C(47)-C(52)-H(52A)  | 120.0     |
| C(35)-C(36)-H(36A)  | 120.0     | O(5)-C(53)-C(54)    | 110.2(9)  |
| C(36)-C(37)-C(38)   | 120.0     | O(5)-C(53)-H(53A)   | 109.6     |
| C(36)-C(37)-H(37A)  | 120.0     | C(54)-C(53)-H(53A)  | 109.6     |
| C(38)-C(37)-H(37A)  | 120.0     | O(5)-C(53)-H(53B)   | 109.6     |
| C(37)-C(38)-C(33)   | 120.0     | C(54)-C(53)-H(53B)  | 109.6     |
| C(37)-C(38)-H(38A)  | 120.0     | H(53A)-C(53)-H(53B) | 108.1     |
| C(33)-C(38)-H(38A)  | 120.0     | C(55)-C(54)-C(59)   | 120.0     |
| O(3)-C(39)-C(40)    | 107.9(5)  | C(55)-C(54)-C(53)   | 121.1(11) |
| O(3)-C(39)-H(39A)   | 110.1     | C(59)-C(54)-C(53)   | 118.9(11) |
| C(40)-C(39)-H(39A)  | 110.1     | C(54)-C(55)-C(56)   | 120.0     |
| O(3)-C(39)-H(39B)   | 110.1     | C(54)-C(55)-H(55A)  | 120.0     |
| C(40)-C(39)-H(39B)  | 110.1     | C(56)-C(55)-H(55A)  | 120.0     |
| H(39A)-C(39)-H(39B) | 108.4     | C(55)-C(56)-C(57)   | 120.0     |
| C(41)-C(40)-C(45)   | 120.0     | C(55)-C(56)-H(56A)  | 120.0     |
| C(41)-C(40)-C(39)   | 120.1(4)  | C(57)-C(56)-H(56A)  | 120.0     |
| C(45)-C(40)-C(39)   | 119.9(4)  | C(58)-C(57)-C(56)   | 120.0     |
| C(40)-C(41)-C(42)   | 120.0     | C(58)-C(57)-H(57A)  | 120.0     |
| C(40)-C(41)-H(41A)  | 120.0     | C(56)-C(57)-H(57A)  | 120.0     |
| C(42)-C(41)-H(41A)  | 120.0     | C(59)-C(58)-C(57)   | 120.0     |
| C(43)-C(42)-C(41)   | 120.0     | C(59)-C(58)-H(58A)  | 120.0     |

|                      |           |                      |           |
|----------------------|-----------|----------------------|-----------|
| C(57)-C(58)-H(58A)   | 120.0     | O(10')-Si(2')-C(27') | 109.0(7)  |
| C(58)-C(59)-C(54)    | 120.0     | C(26')-Si(2')-C(27') | 110.3(9)  |
| C(58)-C(59)-H(59A)   | 120.0     | C(28')-Si(2')-C(27') | 112.8(7)  |
| C(54)-C(59)-H(59A)   | 120.0     | C(9)-O(10')-Si(2')   | 116.8(7)  |
| O(5)-C(53')-C(59')   | 102.4(10) | Si(1')-C(20')-H(20D) | 109.5     |
| O(5)-C(53')-H(53C)   | 111.3     | Si(1')-C(20')-H(20E) | 109.5     |
| C(59')-C(53')-H(53C) | 111.3     | H(20D)-C(20')-H(20E) | 109.5     |
| O(5)-C(53')-H(53D)   | 111.3     | Si(1')-C(20')-H(20F) | 109.5     |
| C(59')-C(53')-H(53D) | 111.3     | H(20D)-C(20')-H(20F) | 109.5     |
| H(53C)-C(53')-H(53D) | 109.2     | H(20E)-C(20')-H(20F) | 109.5     |
| C(58')-C(59')-C(54') | 120.0     | Si(1')-C(21')-H(21D) | 109.5     |
| C(58')-C(59')-C(53') | 121.2(12) | Si(1')-C(21')-H(21E) | 109.5     |
| C(54')-C(59')-C(53') | 118.6(12) | H(21D)-C(21')-H(21E) | 109.5     |
| C(59')-C(58')-C(57') | 120.0     | Si(1')-C(21')-H(21F) | 109.5     |
| C(59')-C(58')-H(58B) | 120.0     | H(21D)-C(21')-H(21F) | 109.5     |
| C(57')-C(58')-H(58B) | 120.0     | H(21E)-C(21')-H(21F) | 109.5     |
| C(56')-C(57')-C(58') | 120.0     | C(24')-C(22')-C(25') | 108.8(11) |
| C(56')-C(57')-H(57B) | 120.0     | C(24')-C(22')-C(23') | 110.3(12) |
| C(58')-C(57')-H(57B) | 120.0     | C(25')-C(22')-C(23') | 107.4(11) |
| C(57')-C(56')-C(55') | 120.0     | C(24')-C(22')-Si(1') | 109.6(9)  |
| C(57')-C(56')-H(56B) | 120.0     | C(25')-C(22')-Si(1') | 109.7(9)  |
| C(55')-C(56')-H(56B) | 120.0     | C(23')-C(22')-Si(1') | 111.0(9)  |
| C(56')-C(55')-C(54') | 120.0     | C(22')-C(23')-H(23D) | 109.5     |
| C(56')-C(55')-H(55B) | 120.0     | C(22')-C(23')-H(23E) | 109.5     |
| C(54')-C(55')-H(55B) | 120.0     | H(23D)-C(23')-H(23E) | 109.5     |
| C(55')-C(54')-C(59') | 120.0     | C(22')-C(23')-H(23F) | 109.5     |
| C(55')-C(54')-H(54A) | 120.0     | H(23D)-C(23')-H(23F) | 109.5     |
| C(59')-C(54')-H(54A) | 120.0     | H(23E)-C(23')-H(23F) | 109.5     |
| O(1)-C(60)-H(60A)    | 109.5     | C(22')-C(24')-H(24D) | 109.5     |
| O(1)-C(60)-H(60B)    | 109.5     | C(22')-C(24')-H(24E) | 109.5     |
| H(60A)-C(60)-H(60B)  | 109.5     | H(24D)-C(24')-H(24E) | 109.5     |
| O(1)-C(60)-H(60C)    | 109.5     | C(22')-C(24')-H(24F) | 109.5     |
| H(60A)-C(60)-H(60C)  | 109.5     | H(24D)-C(24')-H(24F) | 109.5     |
| H(60B)-C(60)-H(60C)  | 109.5     | H(24E)-C(24')-H(24F) | 109.5     |
| O(9)-Si(1)-C(21)     | 103.6(7)  | C(22')-C(25')-H(25D) | 109.5     |
| O(9)-Si(1)-C(20)     | 114.9(7)  | C(22')-C(25')-H(25E) | 109.5     |
| C(21)-Si(1)-C(20)    | 109.8(9)  | H(25D)-C(25')-H(25E) | 109.5     |
| O(9)-Si(1)-C(22)     | 109.5(5)  | C(22')-C(25')-H(25F) | 109.5     |
| C(21)-Si(1)-C(22)    | 109.4(8)  | H(25D)-C(25')-H(25F) | 109.5     |
| C(20)-Si(1)-C(22)    | 109.4(7)  | H(25E)-C(25')-H(25F) | 109.5     |
| O(10)-Si(2)-C(27)    | 110.4(7)  | Si(2')-C(26')-H(26D) | 109.5     |
| O(10)-Si(2)-C(26)    | 108.9(6)  | Si(2')-C(26')-H(26E) | 109.5     |
| C(27)-Si(2)-C(26)    | 109.2(7)  | H(26D)-C(26')-H(26E) | 109.5     |
| O(10)-Si(2)-C(28)    | 104.1(5)  | Si(2')-C(26')-H(26F) | 109.5     |
| C(27)-Si(2)-C(28)    | 112.1(7)  | H(26D)-C(26')-H(26F) | 109.5     |
| C(26)-Si(2)-C(28)    | 112.0(6)  | H(26E)-C(26')-H(26F) | 109.5     |
| O(9)-Si(1')-C(20')   | 114.8(7)  | Si(2')-C(27')-H(27D) | 109.5     |
| O(9)-Si(1')-C(22')   | 102.1(5)  | Si(2')-C(27')-H(27E) | 109.5     |
| C(20')-Si(1')-C(22') | 112.9(8)  | H(27D)-C(27')-H(27E) | 109.5     |
| O(9)-Si(1')-C(21')   | 103.8(7)  | Si(2')-C(27')-H(27F) | 109.5     |
| C(20')-Si(1')-C(21') | 112.1(10) | H(27D)-C(27')-H(27F) | 109.5     |
| C(22')-Si(1')-C(21') | 110.3(7)  | H(27E)-C(27')-H(27F) | 109.5     |
| O(10')-Si(2')-C(26') | 109.8(7)  | C(31')-C(28')-C(29') | 109.3(13) |
| O(10')-Si(2')-C(28') | 105.5(6)  | C(31')-C(28')-C(30') | 109.7(12) |
| C(26')-Si(2')-C(28') | 109.3(6)  | C(29')-C(28')-C(30') | 107.9(12) |

|                      |           |                      |       |
|----------------------|-----------|----------------------|-------|
| C(31')-C(28')-Si(2') | 111.1(9)  | H(30D)-C(30')-H(30E) | 109.5 |
| C(29')-C(28')-Si(2') | 109.5(9)  | C(28')-C(30')-H(30F) | 109.5 |
| C(30')-C(28')-Si(2') | 109.3(10) | H(30D)-C(30')-H(30F) | 109.5 |
| C(28')-C(29')-H(29D) | 109.5     | H(30E)-C(30')-H(30F) | 109.5 |
| C(28')-C(29')-H(29E) | 109.5     | C(28')-C(31')-H(31D) | 109.5 |
| H(29D)-C(29')-H(29E) | 109.5     | C(28')-C(31')-H(31E) | 109.5 |
| C(28')-C(29')-H(29F) | 109.5     | H(31D)-C(31')-H(31E) | 109.5 |
| H(29D)-C(29')-H(29F) | 109.5     | C(28')-C(31')-H(31F) | 109.5 |
| H(29E)-C(29')-H(29F) | 109.5     | H(31D)-C(31')-H(31F) | 109.5 |
| C(28')-C(30')-H(30D) | 109.5     | H(31E)-C(31')-H(31F) | 109.5 |
| C(28')-C(30')-H(30E) | 109.5     |                      |       |

---

Symmetry transformations used to generate equivalent atoms:

**Table 4S. Anisotropic displacement parameters ( $\text{\AA}^2 \times 10^3$ ) for 10. The anisotropic displacement factor exponent takes the form:  $-2\pi^2 [h^2 a^{*2} U^{11} + \dots + 2 h k a^* b^* U^{12}]$**

|        | U <sup>11</sup> | U <sup>22</sup> | U <sup>33</sup> | U <sup>23</sup> | U <sup>13</sup> | U <sup>12</sup> |
|--------|-----------------|-----------------|-----------------|-----------------|-----------------|-----------------|
| O(1)   | 40(3)           | 34(3)           | 122(4)          | -10(3)          | 33(3)           | 0(2)            |
| O(2)   | 42(3)           | 29(3)           | 112(4)          | -11(2)          | 21(2)           | -7(2)           |
| O(3)   | 39(2)           | 41(3)           | 93(3)           | -12(3)          | 24(2)           | -8(2)           |
| O(4)   | 43(2)           | 35(3)           | 111(4)          | -5(3)           | 31(2)           | 4(2)            |
| O(5)   | 46(3)           | 30(3)           | 99(4)           | -11(2)          | 26(2)           | -4(2)           |
| O(6)   | 36(2)           | 28(3)           | 93(3)           | -4(2)           | 9(2)            | 0(2)            |
| O(7)   | 38(2)           | 30(3)           | 131(4)          | -10(3)          | -26(2)          | 8(2)            |
| O(9)   | 65(3)           | 38(3)           | 57(3)           | 6(2)            | -20(2)          | -7(2)           |
| O(10)  | 45(6)           | 44(6)           | 41(5)           | 3(5)            | -8(4)           | -9(5)           |
| O(11)  | 45(2)           | 40(3)           | 45(3)           | -1(2)           | -8(2)           | 3(2)            |
| O(12)  | 75(3)           | 123(5)          | 59(3)           | -35(3)          | 8(3)            | -37(3)          |
| C(1)   | 43(4)           | 31(4)           | 111(5)          | -15(4)          | 23(4)           | -6(3)           |
| C(2)   | 40(3)           | 34(4)           | 103(5)          | -7(3)           | 27(3)           | -6(3)           |
| C(3)   | 39(4)           | 33(4)           | 106(5)          | -10(4)          | 24(3)           | 0(3)            |
| C(4)   | 38(3)           | 33(4)           | 98(5)           | -8(3)           | 22(3)           | -4(3)           |
| C(5)   | 40(3)           | 32(4)           | 99(5)           | -13(3)          | 27(3)           | -9(3)           |
| C(6)   | 41(4)           | 37(4)           | 109(5)          | -13(4)          | 27(4)           | -1(3)           |
| C(7)   | 37(3)           | 26(4)           | 80(5)           | -3(3)           | -8(3)           | 0(3)            |
| C(8)   | 50(4)           | 30(4)           | 68(4)           | 5(3)            | -21(3)          | 3(3)            |
| C(9)   | 92(5)           | 34(4)           | 66(4)           | 1(3)            | -42(4)          | 1(3)            |
| C(10)  | 77(4)           | 36(4)           | 82(5)           | -4(4)           | -44(4)          | -1(3)           |
| C(11)  | 64(4)           | 29(4)           | 118(6)          | -4(4)           | -44(4)          | 4(3)            |
| O(8)   | 42(6)           | 29(5)           | 68(10)          | 6(5)            | -17(6)          | 4(4)            |
| C(12)  | 53(8)           | 25(6)           | 58(14)          | 6(7)            | -18(7)          | 3(5)            |
| C(13)  | 42(7)           | 29(6)           | 61(11)          | 5(7)            | -14(7)          | 5(5)            |
| C(14)  | 39(7)           | 33(7)           | 49(9)           | 1(6)            | -11(6)          | 8(5)            |
| C(15)  | 59(8)           | 33(7)           | 43(9)           | 5(6)            | -8(7)           | 4(6)            |
| C(16)  | 52(8)           | 33(8)           | 62(10)          | -3(7)           | -5(7)           | 3(6)            |
| C(17)  | 44(9)           | 42(8)           | 53(10)          | -2(6)           | -9(7)           | -1(7)           |
| C(18)  | 64(9)           | 50(9)           | 47(10)          | 0(6)            | -4(7)           | -6(7)           |
| C(19)  | 46(9)           | 36(8)           | 52(10)          | -3(6)           | -6(7)           | 8(6)            |
| O(8')  | 40(5)           | 33(5)           | 63(8)           | 1(5)            | -7(5)           | 1(4)            |
| C(12') | 43(8)           | 34(7)           | 78(14)          | 9(7)            | -16(7)          | 5(5)            |
| C(13') | 37(7)           | 46(7)           | 98(13)          | 18(7)           | -14(8)          | 10(5)           |
| C(14') | 38(8)           | 36(6)           | 69(11)          | 3(5)            | -9(7)           | 6(5)            |
| C(15') | 50(8)           | 45(7)           | 64(10)          | 6(6)            | -7(7)           | 3(6)            |
| C(16') | 64(10)          | 42(8)           | 77(11)          | 1(7)            | -4(8)           | -9(7)           |
| C(17') | 55(8)           | 50(8)           | 76(11)          | 21(6)           | -6(7)           | 3(6)            |
| C(18') | 40(8)           | 61(8)           | 80(11)          | 12(7)           | -1(7)           | 9(6)            |
| C(19') | 37(7)           | 53(8)           | 81(11)          | 8(6)            | -6(7)           | 10(5)           |
| C(20)  | 61(10)          | 41(9)           | 76(9)           | 9(7)            | 12(7)           | 9(8)            |
| C(21)  | 53(10)          | 48(12)          | 86(10)          | 4(8)            | -10(8)          | -23(9)          |
| C(22)  | 49(7)           | 35(7)           | 74(8)           | -2(5)           | 4(6)            | 1(5)            |
| C(23)  | 54(8)           | 45(9)           | 82(8)           | 13(6)           | 10(6)           | 3(6)            |
| C(24)  | 57(7)           | 40(8)           | 99(11)          | 4(7)            | 0(7)            | -9(6)           |
| C(25)  | 52(8)           | 48(9)           | 73(9)           | -5(8)           | 5(7)            | -5(6)           |
| C(26)  | 53(7)           | 46(7)           | 40(8)           | 5(6)            | -6(6)           | -14(6)          |
| C(27)  | 69(8)           | 53(8)           | 56(9)           | 7(7)            | 7(7)            | 8(6)            |
| C(28)  | 52(7)           | 56(8)           | 50(7)           | 16(6)           | -12(6)          | -10(5)          |
| C(29)  | 82(10)          | 83(10)          | 77(10)          | 27(8)           | -23(8)          | -31(8)          |

|        |         |         |         |        |         |        |
|--------|---------|---------|---------|--------|---------|--------|
| C(30)  | 74(10)  | 68(11)  | 49(7)   | 6(7)   | -18(6)  | -4(8)  |
| C(31)  | 69(9)   | 81(12)  | 70(12)  | -3(9)  | -18(8)  | 1(9)   |
| C(32)  | 59(4)   | 53(5)   | 51(4)   | -1(4)  | 13(3)   | -8(3)  |
| C(33)  | 56(4)   | 43(4)   | 61(4)   | -4(3)  | 14(3)   | -2(3)  |
| C(34)  | 58(4)   | 90(6)   | 59(4)   | 0(4)   | 2(3)    | 32(4)  |
| C(35)  | 51(4)   | 130(8)  | 87(6)   | 9(5)   | 5(4)    | 37(5)  |
| C(36)  | 58(5)   | 79(7)   | 117(6)  | 1(5)   | 24(4)   | 13(4)  |
| C(37)  | 64(5)   | 150(10) | 137(7)  | -64(7) | 50(5)   | -21(5) |
| C(38)  | 63(5)   | 145(10) | 119(6)  | -76(7) | 37(4)   | -29(5) |
| C(39)  | 36(3)   | 40(4)   | 94(5)   | 0(4)   | 18(3)   | -3(3)  |
| C(40)  | 34(3)   | 32(4)   | 94(5)   | -8(3)  | 27(3)   | -5(3)  |
| C(41)  | 31(3)   | 40(4)   | 111(5)  | -8(4)  | 10(3)   | 4(3)   |
| C(42)  | 28(3)   | 62(5)   | 124(6)  | -20(4) | 9(4)    | -1(3)  |
| C(43)  | 59(5)   | 60(5)   | 122(7)  | -37(4) | 45(4)   | -23(4) |
| C(44)  | 102(6)  | 47(5)   | 113(6)  | -19(5) | 55(5)   | -29(4) |
| C(45)  | 80(5)   | 38(4)   | 103(6)  | 0(4)   | 40(4)   | -10(3) |
| C(46)  | 46(4)   | 50(5)   | 138(7)  | 22(5)  | 41(4)   | 10(3)  |
| C(47)  | 41(4)   | 34(4)   | 137(7)  | 2(4)   | 31(4)   | 2(3)   |
| C(48)  | 53(3)   | 42(3)   | 227(7)  | 28(4)  | 70(4)   | 10(3)  |
| C(49)  | 53(3)   | 42(3)   | 227(7)  | 28(4)  | 70(4)   | 10(3)  |
| C(50)  | 45(4)   | 35(4)   | 174(8)  | -25(5) | 31(4)   | 5(3)   |
| C(51)  | 46(4)   | 34(4)   | 114(6)  | -23(4) | 11(4)   | 2(3)   |
| C(52)  | 38(3)   | 35(4)   | 106(6)  | -14(4) | 14(3)   | -5(3)  |
| C(53)  | 33(7)   | 29(6)   | 90(10)  | -2(5)  | 25(7)   | 9(5)   |
| C(54)  | 39(8)   | 26(6)   | 68(10)  | -6(6)  | 1(6)    | 2(5)   |
| C(55)  | 84(9)   | 37(9)   | 91(13)  | 1(8)   | -29(8)  | 12(7)  |
| C(56)  | 115(12) | 36(9)   | 107(14) | 11(9)  | -13(10) | 15(8)  |
| C(57)  | 112(11) | 41(9)   | 66(10)  | -6(7)  | 7(9)    | 17(8)  |
| C(58)  | 63(8)   | 41(9)   | 51(10)  | -4(7)  | 24(7)   | -4(6)  |
| C(59)  | 36(7)   | 27(8)   | 51(10)  | -8(7)  | 16(6)   | 3(5)   |
| C(53') | 79(12)  | 28(6)   | 79(9)   | 3(5)   | 8(7)    | -3(6)  |
| C(59') | 38(8)   | 30(6)   | 47(8)   | -11(6) | 7(6)    | -1(5)  |
| C(58') | 46(8)   | 36(10)  | 51(12)  | 6(8)   | 3(7)    | 1(6)   |
| C(57') | 61(8)   | 47(10)  | 42(11)  | -2(7)  | -1(7)   | -9(6)  |
| C(56') | 65(9)   | 38(9)   | 69(11)  | -1(8)  | -20(8)  | -1(7)  |
| C(55') | 55(8)   | 46(9)   | 81(12)  | -6(8)  | -12(7)  | 8(7)   |
| C(54') | 47(7)   | 45(8)   | 60(10)  | -16(7) | 0(6)    | 2(6)   |
| C(60)  | 39(4)   | 41(5)   | 124(7)  | -11(4) | 26(4)   | 2(3)   |
| Si(1)  | 51(4)   | 29(3)   | 62(3)   | 2(2)   | 1(3)    | -3(2)  |
| Si(2)  | 43(3)   | 47(3)   | 42(3)   | 5(2)   | 0(2)    | -6(2)  |
| Si(1') | 56(4)   | 36(4)   | 53(3)   | 7(2)   | -7(3)   | -7(3)  |
| Si(2') | 46(3)   | 48(3)   | 44(3)   | 2(2)   | -5(2)   | -4(2)  |
| O(10') | 49(6)   | 38(6)   | 35(5)   | 6(5)   | -8(4)   | 1(5)   |
| C(20') | 60(10)  | 49(8)   | 94(14)  | 9(8)   | -2(10)  | -4(7)  |
| C(21') | 65(10)  | 69(12)  | 47(8)   | 10(7)  | 0(7)    | -21(8) |
| C(22') | 42(7)   | 47(9)   | 50(7)   | -4(6)  | -7(5)   | -7(6)  |
| C(23') | 54(8)   | 59(9)   | 58(9)   | -4(7)  | -9(7)   | 7(7)   |
| C(24') | 58(8)   | 63(9)   | 82(10)  | 9(8)   | -13(7)  | -22(7) |
| C(25') | 51(7)   | 52(9)   | 44(6)   | -1(6)  | -8(5)   | -11(6) |
| C(26') | 59(8)   | 49(7)   | 66(9)   | -7(6)  | -12(7)  | 2(6)   |
| C(27') | 64(10)  | 97(14)  | 40(9)   | 17(9)  | 2(7)    | -20(9) |
| C(28') | 58(8)   | 43(8)   | 56(8)   | -1(6)  | -18(6)  | 3(6)   |
| C(29') | 102(12) | 49(8)   | 76(11)  | 7(7)   | -24(9)  | 1(7)   |
| C(30') | 83(10)  | 65(10)  | 58(8)   | -4(7)  | -20(7)  | -6(9)  |
| C(31') | 53(7)   | 67(10)  | 79(9)   | 3(8)   | -13(6)  | 4(7)   |



**Table 5S. Hydrogen coordinates ( x 10<sup>4</sup>) and isotropic displacement parameters (Å<sup>2</sup>x 10<sup>-3</sup>) for 10.**

|        | x    | y     | z    | U(eq) |
|--------|------|-------|------|-------|
| H(1A)  | 578  | 2091  | 8219 | 73    |
| H(2A)  | 2704 | 1621  | 8060 | 70    |
| H(3A)  | 3202 | 2429  | 9217 | 71    |
| H(4A)  | 4052 | 3292  | 8126 | 67    |
| H(5A)  | 2231 | 4181  | 8903 | 68    |
| H(6A)  | 1802 | 5503  | 8181 | 74    |
| H(6B)  | 3211 | 5612  | 8444 | 74    |
| H(7A)  | 4088 | 6375  | 7672 | 57    |
| H(8A)  | 3722 | 5138  | 6622 | 60    |
| H(9)   | 4923 | 6833  | 6257 | 78    |
| H(10A) | 3751 | 8431  | 6484 | 79    |
| H(11)  | 3067 | 8038  | 7556 | 86    |
| H(12A) | 1003 | 7937  | 6709 | 55    |
| H(12B) | 860  | 8045  | 7407 | 55    |
| H(13A) | 113  | 10230 | 6979 | 53    |
| H(13B) | 480  | 9651  | 6378 | 53    |
| H(15A) | 1410 | 11787 | 7344 | 54    |
| H(16A) | 2723 | 13246 | 7121 | 59    |
| H(17A) | 3658 | 13332 | 6209 | 56    |
| H(18A) | 3280 | 11958 | 5522 | 64    |
| H(19A) | 1967 | 10499 | 5745 | 54    |
| H(12C) | 1574 | 7942  | 6416 | 62    |
| H(12D) | 903  | 8338  | 6997 | 62    |
| H(13C) | 416  | 10130 | 6622 | 73    |
| H(13D) | 862  | 9608  | 6020 | 73    |
| H(15B) | 1557 | 11782 | 7002 | 63    |
| H(16B) | 2571 | 13408 | 6773 | 73    |
| H(17B) | 3320 | 13683 | 5834 | 73    |
| H(18B) | 3055 | 12332 | 5124 | 73    |
| H(19B) | 2041 | 10706 | 5352 | 69    |
| H(20A) | 8070 | 8712  | 6332 | 89    |
| H(20B) | 7565 | 7501  | 6423 | 89    |
| H(20C) | 6796 | 8323  | 6006 | 89    |
| H(21A) | 8126 | 8913  | 7661 | 94    |
| H(21B) | 6853 | 8810  | 8015 | 94    |
| H(21C) | 7484 | 7750  | 7744 | 94    |
| H(23A) | 6043 | 10292 | 6009 | 90    |
| H(23B) | 4652 | 10103 | 6242 | 90    |
| H(23C) | 5285 | 11281 | 6286 | 90    |
| H(24A) | 7571 | 10740 | 7396 | 98    |
| H(24B) | 7800 | 10738 | 6709 | 98    |
| H(24C) | 6973 | 11677 | 6992 | 98    |
| H(25A) | 5347 | 10383 | 7752 | 87    |
| H(25B) | 4869 | 11336 | 7326 | 87    |
| H(25C) | 4236 | 10158 | 7282 | 87    |
| H(26A) | 4316 | 8200  | 4658 | 70    |
| H(26B) | 3595 | 8696  | 5201 | 70    |
| H(26C) | 4976 | 8194  | 5294 | 70    |
| H(27A) | 4691 | 5791  | 4559 | 89    |

|        |       |       |       |     |
|--------|-------|-------|-------|-----|
| H(27B) | 5370  | 5784  | 5191  | 89  |
| H(27C) | 4197  | 4999  | 5056  | 89  |
| H(29A) | 1886  | 4955  | 4942  | 121 |
| H(29B) | 1218  | 5524  | 5480  | 121 |
| H(29C) | 493   | 5437  | 4860  | 121 |
| H(30A) | 2525  | 6074  | 4087  | 96  |
| H(30B) | 1126  | 6554  | 4031  | 96  |
| H(30C) | 2305  | 7360  | 4090  | 96  |
| H(31A) | 1351  | 8255  | 4937  | 111 |
| H(31B) | 166   | 7460  | 4857  | 111 |
| H(31C) | 891   | 7546  | 5477  | 111 |
| H(34A) | 7292  | 5393  | 7597  | 83  |
| H(35A) | 9429  | 5170  | 7846  | 107 |
| H(36A) | 10812 | 4487  | 7158  | 101 |
| H(37A) | 10058 | 4026  | 6222  | 139 |
| H(38A) | 7921  | 4248  | 5974  | 130 |
| H(39A) | 5533  | 4648  | 8214  | 68  |
| H(39B) | 6204  | 3581  | 8479  | 68  |
| H(41A) | 7027  | 3749  | 9554  | 72  |
| H(42A) | 8249  | 4845  | 10182 | 85  |
| H(43A) | 8491  | 6694  | 9978  | 96  |
| H(44A) | 7511  | 7447  | 9145  | 104 |
| H(45A) | 6289  | 6351  | 8517  | 87  |
| H(46A) | 4239  | 655   | 9443  | 92  |
| H(46B) | 4854  | 1770  | 9669  | 92  |
| H(48A) | 6998  | 1663  | 8781  | 127 |
| H(49A) | 9010  | 896   | 8872  | 127 |
| H(50A) | 9383  | -542  | 9521  | 101 |
| H(51A) | 7744  | -1213 | 10080 | 77  |
| H(52A) | 5731  | -446  | 9989  | 71  |
| H(53A) | 3713  | -119  | 8574  | 60  |
| H(53B) | 2653  | -256  | 8068  | 60  |
| H(55A) | 3966  | -1566 | 9244  | 85  |
| H(56A) | 3223  | -3146 | 9684  | 104 |
| H(57A) | 1167  | -3746 | 9480  | 88  |
| H(58A) | -146  | -2765 | 8835  | 62  |
| H(59A) | 597   | -1184 | 8395  | 45  |
| H(53C) | 2603  | -54   | 7958  | 74  |
| H(53D) | 1103  | -15   | 8052  | 74  |
| H(58B) | 132   | -1459 | 8614  | 53  |
| H(57B) | 297   | -3012 | 9199  | 60  |
| H(56B) | 2280  | -3635 | 9518  | 69  |
| H(55B) | 4099  | -2705 | 9252  | 73  |
| H(54A) | 3934  | -1152 | 8667  | 61  |
| H(60A) | -46   | 3999  | 9040  | 101 |
| H(60B) | -629  | 3095  | 9455  | 101 |
| H(60C) | -862  | 3025  | 8764  | 101 |
| H(20D) | 5691  | 10865 | 6847  | 102 |
| H(20E) | 4418  | 10280 | 6627  | 102 |
| H(20F) | 4693  | 10459 | 7310  | 102 |
| H(21D) | 7159  | 9159  | 6148  | 91  |
| H(21E) | 7057  | 7903  | 6320  | 91  |
| H(21F) | 5917  | 8485  | 5972  | 91  |
| H(23D) | 7198  | 7208  | 7600  | 86  |
| H(23E) | 8243  | 7751  | 7203  | 86  |

|        |      |       |      |     |
|--------|------|-------|------|-----|
| H(23F) | 8406 | 7781  | 7899 | 86  |
| H(24D) | 8420 | 9808  | 7162 | 102 |
| H(24E) | 7537 | 10529 | 7564 | 102 |
| H(24F) | 8633 | 9802  | 7856 | 102 |
| H(25D) | 5843 | 8354  | 8207 | 74  |
| H(25E) | 7071 | 8921  | 8489 | 74  |
| H(25F) | 5976 | 9648  | 8197 | 74  |
| H(26D) | 2635 | 4828  | 4836 | 87  |
| H(26E) | 3428 | 4606  | 5428 | 87  |
| H(26F) | 1921 | 4614  | 5431 | 87  |
| H(27D) | 4075 | 6950  | 4667 | 101 |
| H(27E) | 4092 | 7848  | 5172 | 101 |
| H(27F) | 4866 | 6742  | 5261 | 101 |
| H(29D) | 1942 | 8564  | 5016 | 114 |
| H(29E) | 444  | 8599  | 5076 | 114 |
| H(29F) | 1335 | 8443  | 5644 | 114 |
| H(30D) | 1701 | 7093  | 4283 | 103 |
| H(30E) | 930  | 6017  | 4433 | 103 |
| H(30F) | 206  | 7148  | 4350 | 103 |
| H(31D) | 17   | 5796  | 5428 | 99  |
| H(31E) | 164  | 6758  | 5895 | 99  |
| H(31F) | -726 | 6914  | 5326 | 99  |

---

**Table 6S. Torsion angles [°] for 10.**

|                        |            |
|------------------------|------------|
| C(60)-O(1)-C(1)-O(2)   | 60.6(7)    |
| C(60)-O(1)-C(1)-C(2)   | -178.2(5)  |
| C(5)-O(2)-C(1)-O(1)    | 58.7(7)    |
| C(5)-O(2)-C(1)-C(2)    | -61.5(7)   |
| C(53)-O(5)-C(2)-C(3)   | -92.0(10)  |
| C(53')-O(5)-C(2)-C(3)  | -137.9(10) |
| C(53)-O(5)-C(2)-C(1)   | 147.0(10)  |
| C(53')-O(5)-C(2)-C(1)  | 101.1(11)  |
| O(1)-C(1)-C(2)-O(5)    | 59.0(7)    |
| O(2)-C(1)-C(2)-O(5)    | -177.9(6)  |
| O(1)-C(1)-C(2)-C(3)    | -63.5(7)   |
| O(2)-C(1)-C(2)-C(3)    | 59.6(8)    |
| C(46)-O(4)-C(3)-C(2)   | -107.0(7)  |
| C(46)-O(4)-C(3)-C(4)   | 132.6(7)   |
| O(5)-C(2)-C(3)-O(4)    | 61.2(7)    |
| C(1)-C(2)-C(3)-O(4)    | -177.6(6)  |
| O(5)-C(2)-C(3)-C(4)    | -178.7(5)  |
| C(1)-C(2)-C(3)-C(4)    | -57.5(7)   |
| C(39)-O(3)-C(4)-C(3)   | 120.1(6)   |
| C(39)-O(3)-C(4)-C(5)   | -121.0(6)  |
| O(4)-C(3)-C(4)-O(3)    | -63.9(7)   |
| C(2)-C(3)-C(4)-O(3)    | 174.2(5)   |
| O(4)-C(3)-C(4)-C(5)    | 178.3(6)   |
| C(2)-C(3)-C(4)-C(5)    | 56.4(8)    |
| C(1)-O(2)-C(5)-C(6)    | -174.3(5)  |
| C(1)-O(2)-C(5)-C(4)    | 60.3(7)    |
| O(3)-C(4)-C(5)-O(2)    | -175.5(5)  |
| C(3)-C(4)-C(5)-O(2)    | -56.7(8)   |
| O(3)-C(4)-C(5)-C(6)    | 63.1(8)    |
| C(3)-C(4)-C(5)-C(6)    | -178.1(7)  |
| C(7)-O(6)-C(6)-C(5)    | -167.7(5)  |
| O(2)-C(5)-C(6)-O(6)    | -67.2(6)   |
| C(4)-C(5)-C(6)-O(6)    | 55.6(8)    |
| C(6)-O(6)-C(7)-O(7)    | -68.0(7)   |
| C(6)-O(6)-C(7)-C(8)    | 173.8(5)   |
| C(11)-O(7)-C(7)-O(6)   | 165.8(6)   |
| C(11)-O(7)-C(7)-C(8)   | -75.4(7)   |
| C(32)-O(11)-C(8)-C(7)  | 161.8(5)   |
| C(32)-O(11)-C(8)-C(9)  | -77.9(7)   |
| O(6)-C(7)-C(8)-O(11)   | -83.9(6)   |
| O(7)-C(7)-C(8)-O(11)   | 157.7(5)   |
| O(6)-C(7)-C(8)-C(9)    | 156.2(5)   |
| O(7)-C(7)-C(8)-C(9)    | 37.7(7)    |
| Si(2)-O(10)-C(9)-C(10) | 106.4(12)  |
| Si(2)-O(10)-C(9)-C(8)  | -123.1(11) |
| O(11)-C(8)-C(9)-O(10)  | 135.3(7)   |
| C(7)-C(8)-C(9)-O(10)   | -108.7(8)  |
| O(11)-C(8)-C(9)-C(10)  | -93.5(7)   |
| C(7)-C(8)-C(9)-C(10)   | 22.5(8)    |
| O(11)-C(8)-C(9)-O(10') | 159.7(6)   |
| C(7)-C(8)-C(9)-O(10')  | -84.3(7)   |
| Si(1')-O(9)-C(10)-C(9) | 112.1(7)   |
| Si(1)-O(9)-C(10)-C(9)  | 92.6(7)    |

|                             |            |
|-----------------------------|------------|
| Si(1')-O(9)-C(10)-C(11)     | -126.7(6)  |
| Si(1)-O(9)-C(10)-C(11)      | -146.1(6)  |
| O(10)-C(9)-C(10)-O(9)       | -161.6(7)  |
| C(8)-C(9)-C(10)-O(9)        | 66.4(8)    |
| O(10')-C(9)-C(10)-O(9)      | 173.1(6)   |
| O(10)-C(9)-C(10)-C(11)      | 80.3(9)    |
| C(8)-C(9)-C(10)-C(11)       | -51.7(8)   |
| O(10')-C(9)-C(10)-C(11)     | 55.0(8)    |
| C(7)-O(7)-C(11)-C(10)       | 44.0(8)    |
| C(7)-O(7)-C(11)-C(12)       | -179.5(10) |
| C(7)-O(7)-C(11)-C(12')      | 154.9(11)  |
| O(9)-C(10)-C(11)-O(7)       | -99.2(6)   |
| C(9)-C(10)-C(11)-O(7)       | 19.0(8)    |
| O(9)-C(10)-C(11)-C(12)      | 140.7(11)  |
| C(9)-C(10)-C(11)-C(12)      | -101.1(12) |
| O(9)-C(10)-C(11)-C(12')     | 143.1(9)   |
| C(9)-C(10)-C(11)-C(12')     | -98.7(9)   |
| C(13)-O(8)-C(12)-C(11)      | 155.3(13)  |
| O(7)-C(11)-C(12)-O(8)       | 172.5(11)  |
| C(10)-C(11)-C(12)-O(8)      | -62.0(17)  |
| C(12)-O(8)-C(13)-C(14)      | -158.2(14) |
| O(8)-C(13)-C(14)-C(15)      | -80.5(13)  |
| O(8)-C(13)-C(14)-C(19)      | 94.0(12)   |
| C(19)-C(14)-C(15)-C(16)     | 0.0        |
| C(13)-C(14)-C(15)-C(16)     | 174.4(11)  |
| C(14)-C(15)-C(16)-C(17)     | 0.0        |
| C(15)-C(16)-C(17)-C(18)     | 0.0        |
| C(16)-C(17)-C(18)-C(19)     | 0.0        |
| C(17)-C(18)-C(19)-C(14)     | 0.0        |
| C(15)-C(14)-C(19)-C(18)     | 0.0        |
| C(13)-C(14)-C(19)-C(18)     | -174.4(11) |
| C(13')-O(8')-C(12')-C(11)   | -175.9(13) |
| O(7)-C(11)-C(12')-O(8')     | -178.7(11) |
| C(10)-C(11)-C(12')-O(8')    | -60.8(14)  |
| C(12')-O(8')-C(13')-C(14')  | -171.9(13) |
| O(8')-C(13')-C(14')-C(15')  | -76.2(14)  |
| O(8')-C(13')-C(14')-C(19')  | 98.5(13)   |
| C(19')-C(14')-C(15')-C(16') | 0.0        |
| C(13')-C(14')-C(15')-C(16') | 174.7(10)  |
| C(14')-C(15')-C(16')-C(17') | 0.0        |
| C(15')-C(16')-C(17')-C(18') | 0.0        |
| C(16')-C(17')-C(18')-C(19') | 0.0        |
| C(17')-C(18')-C(19')-C(14') | 0.0        |
| C(15')-C(14')-C(19')-C(18') | 0.0        |
| C(13')-C(14')-C(19')-C(18') | -174.6(10) |
| C(8)-O(11)-C(32)-O(12)      | -4.5(10)   |
| C(8)-O(11)-C(32)-C(33)      | 175.7(5)   |
| O(12)-C(32)-C(33)-C(34)     | -174.2(6)  |
| O(11)-C(32)-C(33)-C(34)     | 5.6(8)     |
| O(12)-C(32)-C(33)-C(38)     | 7.8(9)     |
| O(11)-C(32)-C(33)-C(38)     | -172.4(5)  |
| C(38)-C(33)-C(34)-C(35)     | 0.0        |
| C(32)-C(33)-C(34)-C(35)     | -177.9(6)  |
| C(33)-C(34)-C(35)-C(36)     | 0.0        |
| C(34)-C(35)-C(36)-C(37)     | 0.0        |

|                             |            |
|-----------------------------|------------|
| C(35)-C(36)-C(37)-C(38)     | 0.0        |
| C(36)-C(37)-C(38)-C(33)     | 0.0        |
| C(34)-C(33)-C(38)-C(37)     | 0.0        |
| C(32)-C(33)-C(38)-C(37)     | 178.0(5)   |
| C(4)-O(3)-C(39)-C(40)       | 174.9(5)   |
| O(3)-C(39)-C(40)-C(41)      | 70.4(5)    |
| O(3)-C(39)-C(40)-C(45)      | -108.5(5)  |
| C(45)-C(40)-C(41)-C(42)     | 0.0        |
| C(39)-C(40)-C(41)-C(42)     | -179.0(4)  |
| C(40)-C(41)-C(42)-C(43)     | 0.0        |
| C(41)-C(42)-C(43)-C(44)     | 0.0        |
| C(42)-C(43)-C(44)-C(45)     | 0.0        |
| C(43)-C(44)-C(45)-C(40)     | 0.0        |
| C(41)-C(40)-C(45)-C(44)     | 0.0        |
| C(39)-C(40)-C(45)-C(44)     | 179.0(4)   |
| C(3)-O(4)-C(46)-C(47)       | -172.7(6)  |
| O(4)-C(46)-C(47)-C(48)      | 30.1(8)    |
| O(4)-C(46)-C(47)-C(52)      | -154.2(5)  |
| C(52)-C(47)-C(48)-C(49)     | 0.0        |
| C(46)-C(47)-C(48)-C(49)     | 175.6(6)   |
| C(47)-C(48)-C(49)-C(50)     | 0.0        |
| C(48)-C(49)-C(50)-C(51)     | 0.0        |
| C(49)-C(50)-C(51)-C(52)     | 0.0        |
| C(50)-C(51)-C(52)-C(47)     | 0.0        |
| C(48)-C(47)-C(52)-C(51)     | 0.0        |
| C(46)-C(47)-C(52)-C(51)     | -175.8(6)  |
| C(2)-O(5)-C(53)-C(54)       | -177.4(9)  |
| O(5)-C(53)-C(54)-C(55)      | -111.5(12) |
| O(5)-C(53)-C(54)-C(59)      | 67.9(14)   |
| C(59)-C(54)-C(55)-C(56)     | 0.0        |
| C(53)-C(54)-C(55)-C(56)     | 179.3(12)  |
| C(54)-C(55)-C(56)-C(57)     | 0.0        |
| C(55)-C(56)-C(57)-C(58)     | 0.0        |
| C(56)-C(57)-C(58)-C(59)     | 0.0        |
| C(57)-C(58)-C(59)-C(54)     | 0.0        |
| C(55)-C(54)-C(59)-C(58)     | 0.0        |
| C(53)-C(54)-C(59)-C(58)     | -179.4(12) |
| C(2)-O(5)-C(53')-C(59')     | 164.0(9)   |
| O(5)-C(53')-C(59')-C(58')   | 99.1(12)   |
| O(5)-C(53')-C(59')-C(54')   | -75.7(14)  |
| C(54')-C(59')-C(58')-C(57') | 0.0        |
| C(53')-C(59')-C(58')-C(57') | -174.8(13) |
| C(59')-C(58')-C(57')-C(56') | 0.0        |
| C(58')-C(57')-C(56')-C(55') | 0.0        |
| C(57')-C(56')-C(55')-C(54') | 0.0        |
| C(56')-C(55')-C(54')-C(59') | 0.0        |
| C(58')-C(59')-C(54')-C(55') | 0.0        |
| C(53')-C(59')-C(54')-C(55') | 174.9(13)  |
| C(10)-O(9)-Si(1)-C(21)      | 179.7(9)   |
| C(10)-O(9)-Si(1)-C(20)      | -60.5(9)   |
| C(10)-O(9)-Si(1)-C(22)      | 63.1(8)    |
| C(23)-C(22)-Si(1)-O(9)      | -77.9(9)   |
| C(25)-C(22)-Si(1)-O(9)      | 41.9(10)   |
| C(24)-C(22)-Si(1)-O(9)      | 161.5(9)   |
| C(23)-C(22)-Si(1)-C(21)     | 169.2(10)  |

|                             |            |
|-----------------------------|------------|
| C(25)-C(22)-Si(1)-C(21)     | -71.0(11)  |
| C(24)-C(22)-Si(1)-C(21)     | 48.6(12)   |
| C(23)-C(22)-Si(1)-C(20)     | 48.8(11)   |
| C(25)-C(22)-Si(1)-C(20)     | 168.7(10)  |
| C(24)-C(22)-Si(1)-C(20)     | -71.8(11)  |
| C(9)-O(10)-Si(2)-C(27)      | 63.9(14)   |
| C(9)-O(10)-Si(2)-C(26)      | -56.0(14)  |
| C(9)-O(10)-Si(2)-C(28)      | -175.6(11) |
| C(31)-C(28)-Si(2)-O(10)     | 63.8(12)   |
| C(29)-C(28)-Si(2)-O(10)     | -58.2(12)  |
| C(30)-C(28)-Si(2)-O(10)     | -176.6(10) |
| C(31)-C(28)-Si(2)-C(27)     | -176.9(11) |
| C(29)-C(28)-Si(2)-C(27)     | 61.1(12)   |
| C(30)-C(28)-Si(2)-C(27)     | -57.2(11)  |
| C(31)-C(28)-Si(2)-C(26)     | -53.7(12)  |
| C(29)-C(28)-Si(2)-C(26)     | -175.7(10) |
| C(30)-C(28)-Si(2)-C(26)     | 65.9(11)   |
| C(10)-O(9)-Si(1')-C(20')    | 53.6(10)   |
| C(10)-O(9)-Si(1')-C(22')    | 176.1(6)   |
| C(10)-O(9)-Si(1')-C(21')    | -69.2(8)   |
| C(10)-C(9)-O(10')-Si(2')    | 128.6(8)   |
| C(8)-C(9)-O(10')-Si(2')     | -116.2(8)  |
| C(26')-Si(2')-O(10')-C(9)   | 93.7(9)    |
| C(28')-Si(2')-O(10')-C(9)   | -148.6(8)  |
| C(27')-Si(2')-O(10')-C(9)   | -27.3(12)  |
| O(9)-Si(1')-C(22')-C(24')   | -177.0(9)  |
| C(20')-Si(1')-C(22')-C(24') | -53.1(13)  |
| C(21')-Si(1')-C(22')-C(24') | 73.1(12)   |
| O(9)-Si(1')-C(22')-C(25')   | -57.6(10)  |
| C(20')-Si(1')-C(22')-C(25') | 66.2(12)   |
| C(21')-Si(1')-C(22')-C(25') | -167.5(10) |
| O(9)-Si(1')-C(22')-C(23')   | 60.9(10)   |
| C(20')-Si(1')-C(22')-C(23') | -175.2(11) |
| C(21')-Si(1')-C(22')-C(23') | -49.0(12)  |
| O(10')-Si(2')-C(28')-C(31') | -54.0(11)  |
| C(26')-Si(2')-C(28')-C(31') | 64.0(12)   |
| C(27')-Si(2')-C(28')-C(31') | -172.9(11) |
| O(10')-Si(2')-C(28')-C(29') | 66.8(11)   |
| C(26')-Si(2')-C(28')-C(29') | -175.1(11) |
| C(27')-Si(2')-C(28')-C(29') | -52.0(13)  |
| O(10')-Si(2')-C(28')-C(30') | -175.2(10) |
| C(26')-Si(2')-C(28')-C(30') | -57.1(11)  |
| C(27')-Si(2')-C(28')-C(30') | 66.0(12)   |

---

Symmetry transformations used to generate equivalent atoms:

**Table 7S. Hydrogen bonds for 10 [Å and °].**

| D-H...A                | d(D-H) | d(H...A) | d(D...A)  | <(DHA) |
|------------------------|--------|----------|-----------|--------|
| C(10)-H(10A)...O(8')   | 1.00   | 2.17     | 2.717(12) | 112.3  |
| C(12')-H(12C)...O(10') | 0.99   | 2.16     | 2.83(2)   | 124.1  |
| C(53)-H(53A)...O(4)    | 0.99   | 2.48     | 3.102(14) | 120.6  |
| C(53)-H(53B)...O(8)#1  | 0.99   | 2.59     | 3.55(2)   | 163.6  |

Symmetry transformations used to generate equivalent atoms:

#1 x,y-1,z

**Projection view with 30% probability ellipsoids- disorder components and H atoms omitted for clarity:**

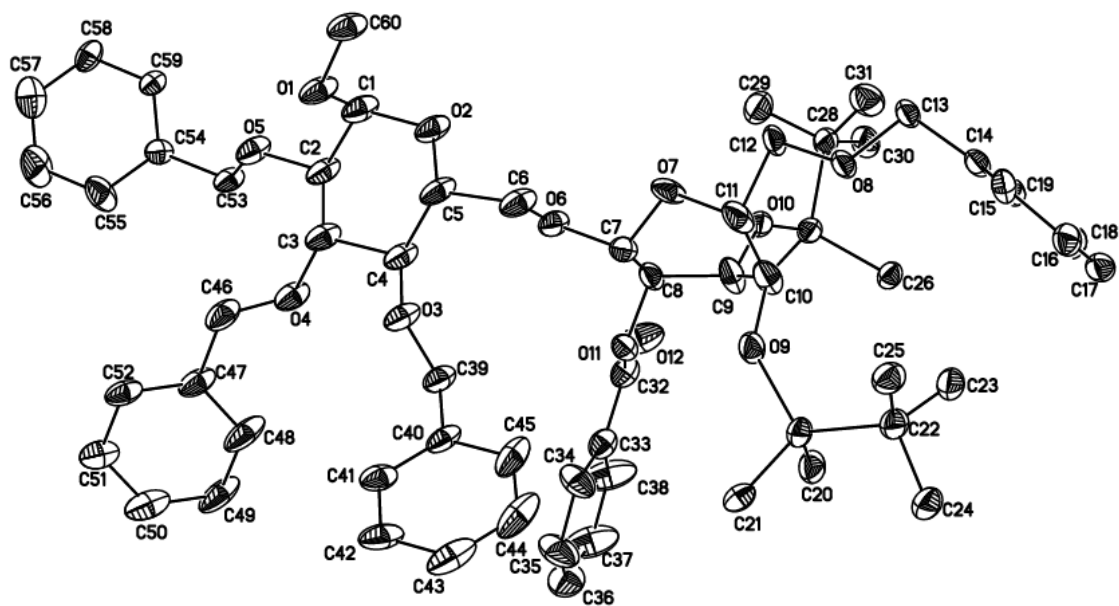

Supplement: NIHMS867355-supplement-si.pdf [file NIHMS867355-supplement-si.pdf]
